# Supplementary material for: How congenital Zika virus impacted my child’s functioning and disability: a Brazilian qualitative study guided by the ICF
Source: PubMed Central journal article supplement — BMJ Open. 2020 Dec 2;10(12):e038228. doi: 10.1136/bmjopen-2020-038228 (PMC7713226; doi:10.1136/bmjopen-2020-038228), 2020-12-02
Supplement: bmjopen-2020-038228.draft_revisions.pdf [file bmjopen-2020-038228.draft_revisions.pdf]

# BMJ Open

BMJ Open is committed to open peer review. As part of this commitment we make the peer review history of every article we publish publicly available.

When an article is published we post the peer reviewers' comments and the authors' responses online. We also post the versions of the paper that were used during peer review. These are the versions that the peer review comments apply to.

The versions of the paper that follow are the versions that were submitted during the peer review process. They are not the versions of record or the final published versions. They should not be cited or distributed as the published version of this manuscript.

BMJ Open is an open access journal and the full, final, typeset and author-corrected version of record of the manuscript is available on our site with no access controls, subscription charges or pay-per-view fees (<http://bmjopen.bmj.com>).

If you have any questions on BMJ Open's open peer review process please email [info.bmjopen@bmj.com](mailto:info.bmjopen@bmj.com)

# BMJ Open

## How Congenital Zika Virus impacted my child's functioning and disability: a Brazilian qualitative study guided by the ICF

|                               |                                                                                                                                                                                                                                                                                                                                                                                                                                                                                                                      |
|-------------------------------|----------------------------------------------------------------------------------------------------------------------------------------------------------------------------------------------------------------------------------------------------------------------------------------------------------------------------------------------------------------------------------------------------------------------------------------------------------------------------------------------------------------------|
| Journal:                      | <i>BMJ Open</i>                                                                                                                                                                                                                                                                                                                                                                                                                                                                                                      |
| Manuscript ID                 | bmjopen-2020-038228                                                                                                                                                                                                                                                                                                                                                                                                                                                                                                  |
| Article Type:                 | Original research                                                                                                                                                                                                                                                                                                                                                                                                                                                                                                    |
| Date Submitted by the Author: | 10-Apr-2020                                                                                                                                                                                                                                                                                                                                                                                                                                                                                                          |
| Complete List of Authors:     | Campos, Taynah; Universidade Federal do Rio Grande do Norte, Schiariti, Veronica; University of Victoria, Gladstone, Melissa; University of Liverpool Institute of Translational Medicine, Women and Children's Health<br>Melo, Adriana; Instituto de Pesquisa Professor Joaquim Amorim Neto<br>Tavares, Jousilene; Instituto de Pesquisa Professor Joaquim Amorim Neto<br>Magalhães, Adriana; Federal University of Rio Grande do Norte – UFRN-FACISA<br>Longo, Egmar; Universidade Federal do Rio Grande do Norte, |
| Keywords:                     | INFECTIOUS DISEASES, Public health < INFECTIOUS DISEASES, Developmental neurology & neurodisability < PAEDIATRICS                                                                                                                                                                                                                                                                                                                                                                                                    |
|                               |                                                                                                                                                                                                                                                                                                                                                                                                                                                                                                                      |

SCHOLARONE™  
Manuscripts

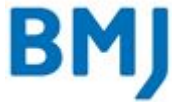

I, the Submitting Author has the right to grant and does grant on behalf of all authors of the Work (as defined in the below author licence), an exclusive licence and/or a non-exclusive licence for contributions from authors who are: i) UK Crown employees; ii) where BMJ has agreed a CC-BY licence shall apply, and/or iii) in accordance with the terms applicable for US Federal Government officers or employees acting as part of their official duties; on a worldwide, perpetual, irrevocable, royalty-free basis to BMJ Publishing Group Ltd ("BMJ") its licensees and where the relevant Journal is co-owned by BMJ to the co-owners of the Journal, to publish the Work in this journal and any other BMJ products and to exploit all rights, as set out in our [licence](#).

The Submitting Author accepts and understands that any supply made under these terms is made by BMJ to the Submitting Author unless you are acting as an employee on behalf of your employer or a postgraduate student of an affiliated institution which is paying any applicable article publishing charge ("APC") for Open Access articles. Where the Submitting Author wishes to make the Work available on an Open Access basis (and intends to pay the relevant APC), the terms of reuse of such Open Access shall be governed by a Creative Commons licence – details of these licences and which [Creative Commons](#) licence will apply to this Work are set out in our licence referred to above.

Other than as permitted in any relevant BMJ Author's Self Archiving Policies, I confirm this Work has not been accepted for publication elsewhere, is not being considered for publication elsewhere and does not duplicate material already published. I confirm all authors consent to publication of this Work and authorise the granting of this licence.

1  
2  
3  
4 ***How Congenital Zika Virus impacted my child's functioning and disability: a Brazilian***  
5 ***qualitative study guided by the ICF***  
6

7  
8 Taynah Neri Correia Campos, Verónica Schiariti, Melissa Gladstone, Adriana Melo,  
9 Jousilene Sales Tavares, Adriana Gomes Magalhães & Egmar Longo

10  
11 **Correspondence to:**

12  
13 **Egmar Longo, PhD**  
14 **Graduate Program in Collective Health – Federal University of Rio Grande do Norte –**  
15 **UFRN-FACISA**  
16 **Rua Vila Trairi S/N, Centro, Santa Cruz, RN**  
17 **59200-000, Brazil, +5584 32912411**  
18 **egmarlongo@yahoo.es**  
19

20  
21 Taynah Neri Correia Campos, MsC  
22 Graduate Program in Collective Health  
23 Federal University of Rio Grande do Norte – UFRN-FACISA  
24 Rua Vila Trairi S/N, Centro, Santa Cruz, RN  
25 59200-000, Brazil  
26

27  
28 Verónica Schiariti, PhD  
29 Adjunct Associate Professor – Division of Medical Sciences  
30 University of Victoria  
31 Victoria, BC, Canada  
32

33  
34 Melissa Gladstone, PhD  
35 Professor of International Child Health and Neurodevelopmental Paediatrics  
36 Department of Women and Children's Health  
37 Institute of Translational Medicine  
38 University of Liverpool  
39 Eaton Road, Liverpool, L12 2AP, UK  
40

41  
42 Adriana Melo, PhD  
43 Instituto de Pesquisa Professor Joaquim Amorim Neto  
44 Campina Grande – Paraiba Brazil  
45

46  
47 Jousilene Sales Tavares, PhD  
48 Instituto de Pesquisa Professor Joaquim Amorim Neto  
49 Campina Grande – Paraiba Brazil  
50

51  
52 Adriana Gomes Magalhães, PhD  
53 Graduate Program in Rehabilitation Sciences – Federal University of Rio Grande do Norte –  
54 UFRN-FACISA  
55 Rua Vila Trairi S/N, Centro, Santa Cruz, RN  
56 59200-000, Brazil  
57

58 **3.861 words**

59 **Keywords:** Zika Virus Infection. Zika Virus. International Classification of Functioning,  
60 Disability and Health. Measures of Association, Exposure, Risk or Outcome

## Abstract

**Introduction:** The Zika Virus outbreak in Brazil had devastating social, medical and financial consequences. Many researchers and clinicians are now following up the children to understand the impact of the Zika on child development, functioning and disability, but outcome measured are heterogenous, and often; it is not clear how meaningful they are to families and children. This study aimed to identify the parents' perspectives on relevant areas of functioning and disability that should be included as outcome measures for children with congenital Zika Syndrome (CZS), guided by the International Classification of Functioning, Disability and Health (ICF).

**Methods:** Participants were recruited from child rehabilitation centers in two states in northeastern Brazil. Parents of children aged 0 to 6 years with confirmed CZS were included. Interviews were conducted using focus groups. Saturation was achieved with six focus groups. Content mapping followed the WHO's ICF linking rules. Three raters analyzed the content using NVIVO 11.

**Results:** eighty-eight percent of participants were mothers, average age 30 years. Most of their children were male (59%), all GMFCS level V. Overall, 825 themes were mapped to the 36 ICF categories. Functioning and disability themes were predominantly linked to environmental factors, activities and participation, and body functions. Although parents mentioned areas across all ICF domains, they reported that areas of mobility, eating and recreation were very relevant for them. In addition, environmental factors were highly identified as barriers, specifically services, policies and access to assistive devices. The most predominant facilitators were immediate family support, kind relationships with therapists and extended family.

**Conclusions:** Although parents emphasized issues related to mobility, their greatest concerns involved environmental factors, such as access and quality of health and social services, systems and policies. These results reinforce the importance of including the parents' perspective when selecting or developing outcome measures for CZS.

### Strengths and limitations of this study

- This is the first qualitative study that has explored the perception of parents regarding the aspects considered relevant in children with CZS based on the ICF model.
- Focus groups provided rich qualitative data and in-depth understanding of the perspectives and experiences of parents/caregivers of children with CZS.
- Several ICF categories were identified by parents as very relevant and these need to be considered within a global context for the establishment of a set of main outcomes and for implementing rehabilitation interventions.
- The role of environmental factors in the statements of parents reflects the real need to include the context as an aspect to be assessed in the follow-up of children with CZS.
- The sample was extracted from three Brazilian cities and generated the views of mothers predominantly with very few fathers taking part. In addition, all children had GMFCS level V.

## INTRODUCTION

The Zika virus (ZIKV) was identified in Brazil at the beginning of 2015. Concurrently, rates of microcephaly and other congenital brain abnormalities increased, thus suggesting a causal relationship between this congenital infection and the clinical presentation.<sup>1</sup> Since then, clinical reports have documented the teratogenic effect of ZIKV in pregnant women, particularly with infection in the first trimester.<sup>2,3,4</sup> The most prominent among the congenital anomalies is microcephaly, but other manifestations such as; spasticity, seizures, eating difficulties, irritability, ocular abnormalities, hearing loss, calcifications, cortical disorders and ventriculomegaly in neuroimaging have been described thus suggesting a new syndrome, called the Congenital Zika Syndrome (CZS).<sup>5,6,7</sup> There is still no complete definition of the scope of this new health condition, and adequate outlines are still needed. As a result, surveillance systems are aware of a wider spectrum of congenital malformations which may be associated with ZIKV infection.<sup>8,9</sup>

A precise estimate of the ZIKV infection incidence is difficult to determine due to the variations between countries regarding the commitment to notifications and the small number of individuals who manifest the health condition caused by ZIKV.<sup>10</sup> There are currently 3,406 confirmed cases of children with microcephaly and/or other neurological signs due to CZS in Brazil, with a further 2,596 cases under investigation.<sup>11</sup>

Given the severity of the syndrome, the scientific community has mobilized efforts to understand the mechanisms of this health condition and to establish outcome measures, which means to define what should be measured and reported in all trials in this area, since creating a standardized core outcome set (COS) validated by specialists in the field will reduce the heterogeneity of the studies and the result bias, and further enable development of meta-analyses and data sharing between the studies.<sup>12</sup>

1  
2  
3  
4 The Core Outcomes Measures in Effectiveness Trials (COMET) initiative identifies and  
5 disseminates the most relevant outcomes for each clinical health situation through a database  
6 and recommends (among other aspects) the involvement of families in developing these  
7 outcomes in order to ensure that the research process is more relevant and appropriate to the  
8 patient's needs.<sup>13, 14</sup> In this context, parents are encouraged to express their children's strengths  
9 and weaknesses in terms of function/structure, activity and participation, environmental factors  
10 and personal factors, following the International Classification of Functionality, Disability and  
11 Health (ICF) which incorporates a biopsychosocial model of disability.<sup>14</sup> The ICF can be used  
12 as a guiding framework which comprises functioning and disability as a dynamic interaction  
13 between health and health-related disorders and contextual factors, including personal and  
14 environmental factors. In addition, the ICF establishes a scientific basis for studying health  
15 determinants and their related conditions, as well as providing a common language for  
16 describing health.<sup>15</sup>

17  
18  
19  
20  
21  
22  
23  
24  
25  
26  
27  
28  
29  
30  
31  
32  
33  
34  
35 This study will contribute to the development of "Zika Cos and congenital infections:  
36 a study to develop the Core Outcome Set (COS) for children with CZS and other congenital  
37 infections" project which is coordinated by the University of Liverpool in partnership with the  
38 University of Victoria (Canada), and integrates the 1<sup>st</sup> phase of this initiative, consisting of the  
39 qualitative stage.<sup>16</sup> Therefore, the objective of this study is to identify the parents' perspectives  
40 on relevant areas of functioning and disability which should be included as outcome measures  
41 for children with CZS, guided by the ICF.

## 52 53 **METHODS**

54  
55  
56 This study implemented a qualitative methodology with an exploratory approach  
57 through focus groups. We chose to use a qualitative approach as it enables investigation and in-  
58  
59  
60

1  
2  
3  
4 depth understanding of the perspectives and experiences of parents/caregivers of children with  
5  
6 CZS. Focus groups, in particular, provide the potential to explore and clarify points of view and  
7  
8 reveal dimensions of understanding which would be less easily accessible in other data  
9  
10 collection formats.<sup>17, 18</sup>  
11  
12  
13

14 This research was approved by the Ethics and Research Committee of the Faculty of  
15  
16 Health Sciences of Trairi/Federal University of Rio Grande do Norte, it was also re-approved  
17  
18 at Liverpool University Ethics Committee and developed in three Brazilian rehabilitation  
19  
20 centers for CZS in the states of Rio Grande do Norte (Physical Therapy School Clinic at UFRN-  
21  
22 FACISA, in Santa Cruz) and Paraíba (Center for the Care of Children with Microcephaly at the  
23  
24 Professor Joaquim Amorim Neto Research Institute - IPESQ, in Campina Grande, and Physical  
25  
26 Therapy School Clinic at UNIPE, in Joao Pessoa). Parents/guardians signed a Consent Form  
27  
28 after being provided with an information sheet which was read out to them. Parents also signed  
29  
30 an authorization for Voice Recording and use of images, (considering Resolution 466/2012 of  
31  
32 the National Health Council which provides for regulatory guidelines and standards for human  
33  
34 research).  
35  
36  
37  
38  
39  
40

41 Participants were purposively selected with members having important common  
42  
43 characteristics. These inclusion criteria included being; parents/caregivers of children with  
44  
45 confirmed diagnosis of CZS by polymerase chain reaction (PCR) or presumed diagnosis based  
46  
47 on obstetric ultrasound, transfontanellar ultrasound, computed tomography (CT) and magnetic  
48  
49 resonance imaging (MRI), who were from zero to six years old and who lived in the area  
50  
51 covered by the study (states of Rio Grande do Norte and Paraíba) and who attended the  
52  
53 respective rehabilitation services. This study did not include parents whose children had  
54  
55 congenital syndromes due to other etiologies.  
56  
57  
58  
59  
60



1  
2  
3  
4 All parents responded to a sociodemographic questionnaire with information about their  
5 relationship with the child, marital status, age, income, government benefit, education, housing  
6 and self-reported health, in addition to information from children about gender, age, mobility,  
7 rehabilitation, frequency day care centers or schools, and difficulties with vision, hearing, sleep  
8 and epilepsy. The physiotherapist who accompanied the children in the rehabilitation centers  
9 also classified their motor abilities using the Gross Motor Function Classification System  
10 (GMFCS). This is an age-specific scheme designed for children with CP based on five levels  
11 of gross motor function, ranging from level I (most able) to level V (least able)<sup>19</sup> and provided  
12 some clear information on the severity of the children whose parents took part in the study. The  
13 study flowchart can be viewed in Figure 1 and the COREQ guidelines were considered.  
14  
15  
16  
17  
18  
19  
20  
21  
22  
23  
24  
25  
26  
27

28 The focus groups were conducted by research assistants, trained both in qualitative  
29 studies and in conducting focus groups. We continued to do focus groups until saturation was  
30 reached where the testimonies became repetitive, predictable, and were not providing any  
31 additional information. Saturation was achieved by the sixth group. Furthermore, we decided  
32 not to exceed six parents/caregivers per group in order to enable effective participation of the  
33 participants and appropriate discussion of themes.  
34  
35  
36  
37  
38  
39  
40  
41  
42

43 A questionnaire adapted from a previous ICF-based qualitative study was used to  
44 conduct the focus group, covering the different ICF domains (Supplementary material 1).<sup>20</sup>  
45 Visual tags were produced with images from the ICF illustrated gallery (Supplementary  
46 material 2)<sup>21</sup> to assist in understanding the concepts, as studies indicate that visualization has  
47 the potential to support data production during the qualitative interview process.<sup>22</sup> The duration  
48 of the focus groups ranged from 60 to 90 minutes. The participants were given a therapeutic  
49 toy developed by research team at the end of the groups, called “fun fishing”, and were  
50 encouraged by the professional team to use it as one of their tools for stimulation and fun.  
51  
52  
53  
54  
55  
56  
57  
58  
59  
60

1  
2  
3  
4 All groups were recorded and later transcribed in full. Names and identification  
5 characteristics were excluded from the transcripts. The transcribed content was analyzed by  
6 three researchers experienced in qualitative research (TC, EL, VS). They split the content into  
7 significant units with using NVIVO software, version 11.0 (QSR International, 2019), and  
8 associated them with each ICF domain and category using the WHO's linking rules<sup>23</sup> as  
9 follows: TC and EL, trained in ICF, performed a blind reading of the content and established  
10 the ICF domain and category for each significant unit of the interview to which it was judged  
11 to be relevant. VS, a specialist in ICF and with extensive experience in childhood disability,  
12 analyzed the disagreements of the two researchers, establishing consensus in relation to the  
13 domain/category of the ICF regarding the significant units. Next, the content was analyzed by  
14 the researchers who interpreted the data through an inductive and deductive analysis process  
15 based on a permanent dialogue throughout the process to ensure consistency and reliability of  
16 the interpretations. Any verbatim which did not exceed "five mentions" was discarded as it was  
17 felt not to be representative enough of the data.  
18  
19  
20  
21  
22  
23  
24  
25  
26  
27  
28  
29  
30  
31  
32  
33  
34  
35

36 Aspects of credibility, transferability, reliability and confirmability were considered  
37 during all stages in order to guarantee the quality of the qualitative research.<sup>24</sup> Credibility was  
38 ensured by thoroughly conducting six focus groups until response saturation was reached, with  
39 subsequent blind analysis, review and triangulation, and then a consensus was reached after  
40 meetings and debates regarding the interpretation of results. The researchers have general  
41 experience and robust training in the area of childhood disabilities and in the use of the ICF for  
42 neuro disabilities. Transferability occurred through observation of the rigor to which the  
43 research group stopped to describe how the data was obtained through the focus groups, the  
44 selection and description of the sample, which in this case involved the participants. Reliability  
45 was guaranteed by detailing the data collection processes, presenting the multiple steps  
46 followed by the researchers, and showing how the pair analysis and data interpretation took  
47  
48  
49  
50  
51  
52  
53  
54  
55  
56  
57  
58  
59  
60

1  
2  
3  
4 place. A measure of reliability through using the kappa statistic was also used to verify the  
5  
6 agreement between the judges, with results indicating almost perfect agreement (0.916)  
7  
8 considering the 95% confidence intervals. Finally, verification was achieved through a peer  
9  
10 discussion of the data at each stage of the analysis by the research team.  
11  
12  
13

14 **Patient and public involvement:** No patient involved.  
15  
16  
17  
18  
19  
20  
21  
22  
23

## 24 RESULTS

25  
26  
27 Six focus groups were conducted with 32 caregivers of children with severe  
28  
29 neurodevelopmental disorders associated with CZS. Information related to children can be  
30  
31 found in Figure 2 and the characteristics of families are in Figure 3. Most of the children were  
32  
33 male, had vision problems and underwent rehabilitation follow-up. The average age was 32.5  
34  
35 (SD= 6.2) months and all presented GMFCS level V. Although none of the children walked,  
36  
37 only 37.5% of them had a wheelchair.  
38  
39  
40

41  
42 Thirty-six categories of the ICF were identified (without considering the personal  
43  
44 factors), as demonstrated in Figure 4. This figure represents the parents' perspectives on  
45  
46 relevant areas of functioning and disability of their children.  
47

48  
49 The parents mentioned relevant areas that covered all ICF domains, but a greater  
50  
51 diversity of categories was observed in the domains of activity and participation and bodily  
52  
53 functions. However, the environmental factors domain led the ranking of 12 categories, as can  
54  
55 be seen in Table 1.  
56  
57  
58  
59  
60

| CATEGORY                                                                                    | QTY | DOMAIN                       |
|---------------------------------------------------------------------------------------------|-----|------------------------------|
| 1° e580 Health services, systems and policies                                               | 59  | Environmental Factors        |
| 2° b760 Control of voluntary movement functions                                             | 37  | Body Functions               |
| 3° e115 Products and technology for personal use in daily living                            | 33  | Environmental Factors        |
| 4° d415 Maintaining a body position                                                         | 33  | Activities and Participation |
| 5° e110 Products or substances for personal consumption                                     | 31  | Environmental Factors        |
| 6° b230 Hearing functions                                                                   | 31  | Body Functions               |
| 7° b134 Sleep functions                                                                     | 31  | Body Functions               |
| 8° d450 Walking                                                                             | 28  | Activities and Participation |
| 9° e120 Products and technology for personal indoor and outdoor mobility and transportation | 25  | Environmental Factors        |
| 10° b210 Seeing functions                                                                   | 24  | Body Functions               |
| 11° d445 Hand and arm use                                                                   | 23  | Activities and Participation |
| 12° s750 Structure of lower extremity                                                       | 22  | Body Structures              |

Table 1: Table demonstrating the ranking of the 12 most frequent categories of the ICF mentioned by parents

Table 2 shows the distribution of categories related to the environmental factors domain in detail.

| Environmental Factors                                                                    |       |       |        |
|------------------------------------------------------------------------------------------|-------|-------|--------|
| e580 Health services, systems and policies                                               | 59    | 33,0% |        |
| e115 Products and technology for personal use in daily living                            | 33    | 18,4% |        |
| e110 Products or substances for personal consumption                                     | 31    | 17,3% |        |
| e120 Products and technology for personal indoor and outdoor mobility and transportation | 25    | 14,0% |        |
| e310 Immediate family                                                                    | 16    | 8,9%  |        |
| e540 Transportation services, systems and policies                                       | 9     | 5,0%  |        |
| e410 Individual attitudes of immediate family members                                    | 6     | 3,4%  |        |
|                                                                                          | TOTAL | 179   | 100,0% |

Table 2: Table of areas of the ICF considered important for parents within the area of Environmental factors

Among the categories, **Health services, systems and policies** (e580) was the most expressed by parents and received 59 mentions. This category includes the prevention and treatment of health problems, the provision of rehabilitation services and the promotion of a

1  
2  
3  
4 healthy lifestyle. In the following verbatim, it is possible to observe the father's desire to have  
5  
6 access to a rehabilitation service in his own city.  
7

8  
9 *“Also that in Alagoas state has been the same possibilities that here in*  
10 *Campina, to don't need to move from one place to other, it's so*  
11 *complicated spend 3 months here, searching treatment that there it*  
12 *should have. I don't know they can't leave this treatment there, to every*  
13 *states have, for us don't need to move a lot to do a treatment. For them*  
14 *could at least sit, maintain their trunk, catch and walk.”* Mother 20.  
15  
16

17  
18 Another area which emerged often by the parent/caregivers as a barrier was; the lack of  
19  
20 information, of professionals specialized in the management of CZS, the desire for healing and  
21  
22 the difficulty in transport to travel to rehabilitation services in other larger cities. Examples of  
23  
24 this are evidenced in the statements below.  
25

26  
27 *“I guess that it would help a lot if the access is facilitated, on your city,*  
28 *if I have physiotherapy on my city, sure I would go more often.”* Mother  
29 03.  
30

31  
32 *“I would like science produces medicines for this disease, because is a*  
33 *new disease. Other thing, my great difficulty is absent of answers, you*  
34 *go to see a doctor with a child, and doctor is stalling, he never says the*  
35 *reality for you.”* Mother 24.  
36

37  
38 *“If our city would have the treatment, moving is tiring. And if when we*  
39 *arrive would be taken care. We suffer some experiences, in some days*  
40 *I spent many hours.”* Mother 04.  
41  
42

43  
44 Some parents pointed to assistive products and technologies as facilitators. They  
45  
46 described how adapted or specially designed equipment improved the functioning of their  
47  
48 children and contributed to greater participation;  
49

50  
51 *“For E\* which facilitates activities it's on first the glasses, because I*  
52 *take her glasses and the vision been worse, put the glasses and she*  
53 *animates.”* Mother 06.  
54  
55

56  
57 The support of the nuclear family was expressed by participants of all focus groups  
58  
59 always as a facilitator of the environment, as described below.  
60

1  
2  
3  
4  
5  
6  
7  
8  
9  
10  
11  
12  
13  
14  
15  
16  
17  
18  
19  
20  
21  
22  
23  
24  
25  
26  
27  
28  
29  
30  
31  
32  
33  
34  
35  
36  
37  
38  
39  
40  
41  
42  
43  
44  
45  
46  
47  
48  
49  
50  
51  
52  
53  
54  
55  
56  
57  
58  
59  
60

*“What does facilitate? I have a lot of support from my husband and my sister. I live close to my sister, my parents don't live in the same city than I, but they always are present, always, until the beginning they are present. My family helps me a lot, and this helps me, when I want to go out and can't take she together, I leave her with my sister. Then, the family support it's the main factor that facilitates, because alone, it's hard.”* Mother 14.

Table 3 presents the categories referring to the activity and participation domain.

| <b>Activities and Participation</b>   |     |        |
|---------------------------------------|-----|--------|
| d415 Maintaining a body position      | 33  | 14,5%  |
| d450 Walking                          | 28  | 12,3%  |
| d445 Hand and arm use                 | 23  | 10,1%  |
| d550 Eating                           | 21  | 9,3%   |
| d920 Recreation and leisure           | 19  | 8,4%   |
| d430 Lifting and carrying objects     | 15  | 6,6%   |
| d110 Watching                         | 15  | 6,6%   |
| d330 Speaking                         | 12  | 5,3%   |
| d760 Family relationships             | 11  | 4,8%   |
| d160 Focusing attention               | 11  | 4,8%   |
| d410 Changing basic body position     | 9   | 4,0%   |
| d455 Moving around                    | 9   | 4,0%   |
| d710 Basic interpersonal interactions | 8   | 3,5%   |
| d730 Relating with strangers          | 7   | 3,1%   |
| d440 Fine hand use                    | 6   | 2,6%   |
| TOTAL                                 | 227 | 100,0% |

Table 3: Table demonstrating areas of the ICF within Activity and participation found as important to parents

As shown in Table 3, the most expressive categories were those related to movement, such as **Maintaining a body position - d415**, **Walking - d450**, and **Hand and arm use - d445**. Such aspects were pointed out by the parents as being responsible for limiting activity and restricting participation in daily activities, as evidenced in the statements below.

*“M\* has difficulty to maintain the body position, when I put him stand position supported on the wall he can stay a long time. Sit, he also doesn't sit alone, but if you put him, he stays, he creeps in, rolls. He doesn't go to lying down position to sitting, but to sitting to lying he can.”* Mother 15.

*“Eat, she holds but doesn't know how put it in her mouth.”* Mother 01.

1  
2  
3  
4  
5  
6  
7  
8  
9  
10  
11  
12  
13  
14  
15  
16  
17  
18  
19  
20  
21  
22  
23  
24  
25  
26  
27  
28  
29  
30  
31  
32  
33  
34  
35  
36  
37  
38  
39  
40  
41  
42  
43  
44  
45  
46  
47  
48  
49  
50  
51  
52  
53  
54  
55  
56  
57  
58  
59  
60

*“His major difficulties are to catch things, he doesn't catch, we need to put in his hand, than he holds, if he needs to pick up some think, he doesn't do, holds if I open his hand he catches, because is difficult for him to open his hand”* Mother 08.

*“I guess it's too hard these children who doesn't walk, doesn't sit yet, if when arrive in some place and it has a wheelchair, if have how to sit him, but he doesn't sit. My great problem is his weight, it's my concern.”* Mother 17.

Finally, the areas of Body Function and Structure identified most by parents is shown in Table 4.

| <b>Body Functions</b>                        |              |            |             |
|----------------------------------------------|--------------|------------|-------------|
| b760 Control of voluntary movement functions | 37           | 16,70%     |             |
| b230 Hearing functions                       | 31           | 14,00%     |             |
| b210 Seeing functions                        | 24           | 10,80%     |             |
| b510 Ingestion functions                     | 19           | 8,60%      |             |
| b134 Sleep functions                         | 31           | 14,00%     |             |
| b710 Mobility of joint functions             | 18           | 8,10%      |             |
| b280 Sensation of pain                       | 16           | 7,20%      |             |
| b735 Muscle tone functions                   | 15           | 6,80%      |             |
| b320 Articulation functions                  | 10           | 4,50%      |             |
| b152 Emotional functions                     | 8            | 3,60%      |             |
| b440 Respiration functions                   | 7            | 3,20%      |             |
| b770 Gait pattern functions                  | 6            | 2,70%      |             |
|                                              | <b>TOTAL</b> | <b>222</b> | <b>100%</b> |
| <b>Body Structures</b>                       |              |            |             |
| s750 Structure of lower extremity            | 22           | 78,60%     |             |
| s730 Structure of upper extremity            | 6            | 21,40%     |             |
|                                              | <b>TOTAL</b> | <b>28</b>  | <b>100%</b> |

Table 4: Table demonstrating the categories of d Body Functions and Structures (within the ICF) identified as important by parents

Regarding the body function domain, there was a predominance of the category related to the **Control of voluntary movement - b760**. Many parents expressed concerns about voluntary movements, both simple and more complex, coordination, support functions of the

1  
2  
3  
4 upper and lower limbs and right-left motor coordination, as shown below in this mother's  
5  
6 speech.

7  
8  
9 *“Movements control, L\* has a lot of difficulties, she can't lift her arm,*  
10 *her hand. About mobility function, she also has difficulties, she can't*  
11 *lift her arm and hand, she doesn't have a lot problems with her legs,*  
12 *but can't move.”* Mother 24.

13  
14  
15  
16 Parents also pointed out problems related to **Hearing functions - b230, Seeing**  
17 **functions - b210** and **Sleep functions - b134**, as can be seen below.

18  
19  
20 *“The listen function doesn't work well , only in one side , in the other it*  
21 *doesn't work , we would make a raffle to earn money and buy a device*  
22 *, because on exam showed that the left one he listens, but on the right*  
23 *he doesn't anything.”* Mother 22.

24  
25  
26 *“About vision function, he doesn't see everything, his vision is low, he*  
27 *has difficulties.”* Father 01.

28  
29  
30 *“He has sleep difficulties, but when he falls on sleep (begins to sleep)*  
31 *he sleeps the whole night.”* Mother 28.

32  
33  
34 For “body structure”, the category relating to **Structure of lower extremity - s750** most  
35 commonly emerged within the parent focus groups. Many parents described issues with foot  
36 positioning and how this prevented walking and standing.

37  
38  
39  
40  
41 *“The knees, because she could crawl and it something that I guess she*  
42 *won't do. And her feet, to can walk, that will be a great difficulty,*  
43 *because she has a dislocation, we don't know if she will walk or if she*  
44 *will need a wheelchair for the rest of her life.”* Mother 27.

45  
46  
47 *“About S\* is his little foot, when I will put him on stand up position, his*  
48 *foot turn to the side.”* Mother 10.

## 51 52 **DISCUSSION**

53  
54  
55 This is a pioneering study which revealed the perceptions of parents and caregivers  
56 regarding the aspects considered relevant in children with CZS based on the ICF model.  
57 Parent/caregiver views, such as these, deserves consideration in constructing core outcome set  
58  
59  
60



1  
2  
3  
4 of measures for this health condition. The use of the ICF as a guide for this study enabled us to  
5  
6 provide a holistic model which enables the care perspective to be extended beyond problems  
7  
8 with the functions and structures of the body in children with CZS. Despite the number of new  
9  
10 cases becoming more stabilized, the complex clinical presentation of CZS and its effect on  
11  
12 children's developmental trajectories requires standardized and individualized care during their  
13  
14 growth.<sup>25</sup> It also requires researchers to think a bit beyond outcomes which only relate to  
15  
16 functioning such as those often measured in child development measures.  
17  
18  
19  
20

21  
22 Several ICF categories were identified by parents as very relevant for them and their  
23  
24 lives and these need to be considered within a global context for the establishment of a set of  
25  
26 main outcomes and for implementing rehabilitation interventions.<sup>26</sup> The role of environmental  
27  
28 factors in the statements of parents reflects the real need to include the context as an aspect to  
29  
30 be assessed in the follow-up of children with CZS.<sup>27, 28</sup> Barriers such as those relating to the  
31  
32 lack of specialized professionals who can support the clinical aspects of children with CZS need  
33  
34 to be addressed.<sup>29</sup> The CDC has produced a pocket guide summarizing pediatric guidelines on  
35  
36 initial assessment and outpatient treatment,<sup>30</sup> but a carefully planned public health approach  
37  
38 with contributions and partnerships between specialists in various clinical and public health  
39  
40 disciplines, improving the ability to anticipating needs, providing adequate care and ensuring  
41  
42 that children reach their full potential is very necessary.<sup>31, 32</sup> This is particularly crucial to really  
43  
44 address the environmental issues which so hinder many parents and families.  
45  
46  
47  
48  
49

50  
51 Many parents/caregivers in our study expressed a desire to receive all treatments and  
52  
53 support in a single place or city. Moving from place to place for services and different types of  
54  
55 rehabilitation in different places/cities is a real barrier for families. Parents in our study signaled  
56  
57 a definite need for reorganizing health services in order to provide more of a "one stop"  
58  
59 approach to supporting them. This same aspect has been highlighted in other studies.<sup>33</sup> From  
60

1  
2  
3  
4 our study, it is clear that services for support and rehabilitation in a single location minimize  
5  
6 problems such as low attendance and/or avoidance. Lack of attendance of course interferes  
7  
8 hugely with creating good outcomes through focused, context-based and evidence-based  
9  
10 rehabilitation.<sup>34</sup>  
11  
12

13  
14 Parents who took part in our study voiced particular concerns around aspects of their  
15  
16 children's movement. This permeated the domains of activity and participation, function and  
17  
18 body structure and was, of course, expressed as a limiting factor in their participation in daily  
19  
20 and leisure activities. It was clear that parents were disappointed and were desperate for a  
21  
22 change in mobility of their children and had had little counselling about adaptations to support  
23  
24 children in their daily lives through other means. The focus still seems to be on the perspective  
25  
26 of "fixing" the disability through therapies.<sup>35</sup>  
27  
28  
29

30  
31 Alongside this, parents voiced their desires relating to gait acquisition (walking) in the  
32  
33 context of their comparison of their children with typical children. This is well documented in  
34  
35 previous research with children with cerebral palsy (CP).<sup>36</sup> We know that many parents who  
36  
37 have children who will never walk often still resist early introduction of mobility aids such as  
38  
39 adapted toy cars despite the fact that studies involving children with CP with severe motor  
40  
41 impairment demonstrate positive results using these adaptations in terms of autonomy, self-  
42  
43 esteem, social skills and participation.<sup>37</sup> At the same time, a recent study has shown that  
44  
45 promoting participation can result in improved body function and structure in children and  
46  
47 young people with physical disabilities.<sup>38</sup>  
48  
49  
50  
51

52  
53 Within the verbatim from parents is a constant viewpoint surrounding the child's  
54  
55 incapacity and a desire for healing. There is little acceptance of the child for what they are  
56  
57 within their context. This negative view of disability is common for parents with children with  
58  
59 similar conditions,<sup>39</sup> with parents tending to focus concerns on the challenges of their children  
60

1  
2  
3  
4 in their daily activities, expressing factors which negatively affected their children's  
5 performance.  
6  
7

8  
9  
10 Our research has demonstrated what areas of the ICF parents of children with congenital  
11 infections such as CZS consider important. This is extremely important when attempting to  
12 establish a core set of measures which should be used as outcomes for children with CZS in the  
13 future. We know that it is essential to also consider the child's own perspective as to what he/she  
14 considers to be relevant in outcome measures, however, children with CZS in this case are not  
15 yet old enough to express their opinions.  
16  
17  
18  
19  
20  
21  
22

23  
24 The results obtained in this study must be interpreted taking into account some  
25 limitations. The sample was extracted from three Brazilian cities, from public or philanthropic  
26 rehabilitation centers, so our findings may not represent the perspectives of all parents of  
27 children with CZS. Our study generated the views of mothers predominantly with very few  
28 fathers taking part. They may have a very different perspective.  
29  
30  
31  
32  
33  
34  
35  
36  
37  
38  
39

## 40 CONCLUSION

41  
42  
43 This is a unique study which aims to understand the views and perception of parents  
44 with regard to the needs of their children with CZS framed within the perspective of the ICF.  
45 Although our series of parents did concentrate on issues related to the lack of movement of their  
46 children, overall their emphasis of discourse was centred around environmental factors. These  
47 factors included issues such as; the context of services, systems and policies for prevention and  
48 treatment of health problems through rehabilitation as well as factors supporting a healthy  
49 lifestyle to promote the physical and psychological well-being and social status of their  
50 children.  
51  
52  
53  
54  
55  
56  
57  
58  
59  
60

1  
2  
3  
4 Our results reinforce the importance of including the parents' perspective in the  
5 development of a core outcome set. Parents are the ones who live and experience the main  
6 limitations and potential of their children and it is them who highlight the urgent need for  
7 environmental changes to improve the lives of children with CZS and their families in Brazil.  
8  
9 In the future, when children with CZS are able to express their own opinions, we should also  
10 hear their views as to what they consider relevant for outcome measures.  
11  
12  
13  
14  
15  
16  
17  
18

19 Figure 1 – Study flowchart

20  
21 Figure 2 – Sociodemographic data of children

22  
23 Figure 3 – Sociodemographic data for parent/caregivers

24  
25  
26 Figure 4: ICF categories representing the parents' perspective  
27  
28  
29  
30  
31  
32  
33  
34  
35  
36  
37  
38  
39  
40  
41  
42  
43  
44  
45  
46  
47  
48  
49  
50  
51  
52  
53  
54  
55  
56  
57  
58  
59  
60

## REFERENCES

1. Rasmussen SA, Jamieson DJ, Honein MA, Petersen LR. Zika virus and birth defects—reviewing the evidence for causality. *New England Journal of Medicine*. 2016;374(20):1981-7.
2. Krauer F, Riesen M, Reveiz L, Oladapo OT, Martinez-Vega R, Porgo TV, et al. Zika virus infection as a cause of congenital brain abnormalities and Guillain–Barré syndrome: systematic review. *PLoS medicine*. 2017;14(1):e1002203.
3. Reyes MM, et al. Zika Virus Detection in Amniotic Fluid and Zika-Associated Birth Defects. *American Journal of Obstetrics and Gynecology*, 2020.
4. Pereira AM, et al. Zika Virus and Pregnancy: Association between Acute Infection and Microcephaly in Newborns in the State of Rio de Janeiro, Brazil. *Geburtshilfe und Frauenheilkunde*, v. 80, n. 01, p. 60-65, 2020
5. Teixeira GA, et al. Analysis of the concept of the Zika Virus congenital syndrome. *Ciencia & saude coletiva*, v. 25, n. 2, p. 567, 2020
6. Oliveira Melo AS, Malinger G, Ximenes R, Szejnfeld PO, Alves Sampaio S, Bispo de Filippis AM. Zika virus intrauterine infection causes fetal brain abnormality and microcephaly: tip of the iceberg? *Ultrasound in obstetrics & gynecology* 2016; 47: 6-7.
7. Melo AS, Aguiar RS, Amorim MM, Arruda MB, Melo FO, Ribeiro ST et al. Congenital Zika Virus Infection: Beyond Neonatal Microcephaly. *JAMA Neurol* 2016; 73: 1407-16
8. Costello A, Dua T, Duran P, Gülmezoglu M, Oladapo OT, Perea W, et al. Defining the syndrome associated with congenital Zika virus infection. *Bulletin of the World Health Organization*. 2016;94(6):406.
9. Niemeyer B, et al. What We Can Find Beyond the Classic Neuroimaging Findings of Congenital Zika Virus Syndrome?. *European Neurology*, p. 1-8, 2020.
10. MacDonald, Pia DM, and E. Wayne Holden. "Zika and public health: Understanding the epidemiology and information environment." *Pediatrics* 141.Supplement 2 (2018): S137-S145.
11. Ministério da Saúde (BR). Secretaria de Vigilância em Saúde. Vigilância em saúde no Brasil 2003|2019: da criação da Secretaria de Vigilância em Saúde aos dias atuais. *Bol Epidemiol* [Internet]. 2019 set [acesso em janeiro 2020]; 50(n.esp.):1-154. Disponível em: <http://www.saude.gov.br/boletins-epidemiologicos>.
12. Williamson P, Altman D, Blazeby J, Clarke M, Gargon E. *Driving up the quality and relevance of research through the use of agreed core outcomes*. SAGE Publications Sage UK: London, England; 2012
13. Prinsen, Cecilia AC, et al. "Core Outcome Measures in Effectiveness Trials (COMET) initiative: protocol for an international Delphi study to achieve consensus on how to select outcome measurement instruments for outcomes included in a 'core outcome set'." *Trials* 15.1 (2014): 247.
14. Schiariti V, Mâsse LC. Identifying relevant areas of functioning in children and youth with Cerebral Palsy using the ICF-CY coding system: From whose perspective? *European Journal of Paediatric Neurology*. 2014;18(5):609-17
15. Organization WH. *International classification of functioning, disability and health: ICF*: Geneva: World Health Organization; 2001
16. Schiariti V, et al. "Implementation of the International Classification of Functioning, Disability, and Health (ICF) core sets for children and youth with cerebral palsy: global initiatives promoting optimal functioning." *International journal of environmental research and public health* 15.9 (2018): 1899.

17. Pope C, Mays N. Reaching the parts other methods cannot reach: an introduction to qualitative methods in health and health services research. *BMJ* 1995;311:42–5
18. Kitzinger J. Qualitative research. Introducing focus groups. *BMJ* 1995;311:299–302
19. Silva DBR, Pfeifer LI, Funayama CAR. GMFCS-E&R: Sistema de classificação da função motora grossa-ampliado e revisado. 2010
20. Schiariti V, et al. ‘He does not see himself as being different’: the perspectives of children and caregivers on relevant areas of functioning in cerebral palsy. *Developmental Medicine & Child Neurology*, v. 56, n. 9, p. 853-861, 2014
21. Takahashi T, Okochi J; Kostanjsek N. Development of ICF Illustration library. In: Tokyo Japan: WHO-Family of International Classifications Network Meeting. 2005.
22. Glegg SM. Facilitating interviews in qualitative research with visual tools: a typology. *Qualitative health research*. 2019;29(2):301-10
23. Cieza A, et al. Refinements of the ICF Linking Rules to strengthen their potential for establishing comparability of health information. *Disability and rehabilitation*, v. 41, n. 5, p. 574-583, 2019.
24. Letts L, Wilkins S, Law M, Stewart D, Bosch J, Westmorland M. Guidelines for critical review form: Qualitative studies (Version 2.0). McMaster University
25. Longo E, de Campos AC, Schiariti V. Zika Virus After Emergency Response: Can the ICF Guide Rehabilitation of Children With Microcephaly? *Pediatric Physical Therapy*. 2019;31(4):370-2
26. Smythe T, et al. Engagement of Fathers in Parent Group Interventions for Children with Congenital Zika Syndrome: A Qualitative Study. *International journal of environmental research and public health*, v. 16, n. 20, p. 3862, 2019
27. Sá MRC, et al. The need to act together in every way possible: inter-sector action in health and education for children living with the congenital Zika syndrome. *Cadernos de saude publica*, v. 35, n. 12, p. e00233718, 2019
28. Darrah J, et al. Context therapy: a new intervention approach for children with cerebral palsy. *Developmental Medicine & Child Neurology*, v. 53, n. 7, p. 615-620, 2011
29. Duarte JS, et al. Necessidades de crianças com síndrome congênita pelo Zika vírus no contexto domiciliar. *Cadernos Saúde Coletiva*, v. 27, n. 3, p. 249-256, 2019.
30. Adebajo T, Godfred-Cato S, Viens L, Fischer M, Staples JE, Kuhnert-Tallman W, et al. Update: interim guidance for the diagnosis, evaluation, and management of infants with possible congenital Zika virus infection—United States, October 2017
31. Broussard CS, Shapiro-Mendoza CK, Peacock G, Rasmussen SA, Mai CT, Petersen EE, et al. Public Health Approach to Addressing the Needs of Children Affected by Congenital Zika Syndrome. *Pediatrics*. 2018;141(Supplement 2):S146-S53
32. Freitas PSS, et al. How do mothers feel? Life with children with congenital Zika syndrome. *International Journal of Gynecology & Obstetrics*, v. 148, p. 20-28, 2020
33. Albuquerque MSV, et al. Access to healthcare for children with Congenital Zika Syndrome in Brazil: perspectives of mothers and health professionals. *Health policy and planning*, v. 34, n. 7, p. 499-507, 2019.
34. Longo E, De Campos AC, Palisano RJ. Let's make pediatric physical therapy a true evidence-based field! Can we count on you?. *Brazilian journal of physical therapy*, v. 23, n. 3, p. 187, 2019
35. Rosenbaum P. The importance of context: what are our assumptions about childhood disability? *Developmental Medicine & Child Neurology*. 2015;57(12):1084
36. Vargus-Adams JN, Martin LK. Domains of importance for parents, medical professionals and youth with cerebral palsy considering treatment outcomes. *Child: care, health and development*, v. 37, n. 2, p. 276-281, 2011

- 1  
2  
3  
4 37. Martin MR, Dischino M. GO BABY GO! THE FREEDOM OF  
5 MOVEMENT. *Palaestra*, v. 31, n. 3, 2017  
6  
7 38. Imms C, Granlund M, Wilson PH, Steenberg B, Rosenbaum PL, Gordon AM.  
8 Participation, both a means and an end: a conceptual analysis of processes and outcomes  
9 in childhood disability. *Developmental Medicine & Child Neurology*. 2017;59(1):16-25  
10  
11 39. Dunn, N., Shields, N., Taylor, N. F., & Dodd, K. J. (2009). Comparing the self concept  
12 of children with cerebral palsy to the perceptions of their parents. *Disability and  
13 rehabilitation*, 31(5), 387-393.  
14  
15  
16  
17  
18

19  
20 **Contributors:** VS, MG and EL designed the study. TNCC recruited the participants and  
21 conducted the interviews. VS, MG, EL, TNCC reviewed and refined the data. TNCC wrote the  
22 article. VS, MG, EL, AM, JST and AGM revised the article. TNCC received qualitative  
23 research training through participation in a qualitative health research methods course at the  
24 Federal University of Rio Grande do Norte/Brazil.  
25

26  
27  
28  
29 **Funding:** This study was not funded  
30

31  
32  
33 **Competing interests:** None declared.  
34

35  
36 **Acknowledgments:** The authors would like to thank all the participants who took part in this  
37 study: without them this study would not have been possible.  
38

39  
40 **Patient consent for publication:** Not required  
41

42  
43 **Data availability statement:** Data are available upon request to the corresponding author. As  
44 data contain information which may lead to the identification of study participants, funding  
45 would be required to support anonymisation of the data  
46  
47

48  
49 **Ethics approval:** This research was approved by the Ethics and Research Committee of the  
50 Faculty of Health Sciences of Trairi/Federal University of Rio Grande do Norte  
51 (75053417.1.0000.5568), it was also re-approved at Liverpool University Ethics Committee  
52 (#2083)  
53  
54  
55

56  
57  
58 **Patient and public involvement:** No patient involved  
59  
60

Figure 1: Study flowchart

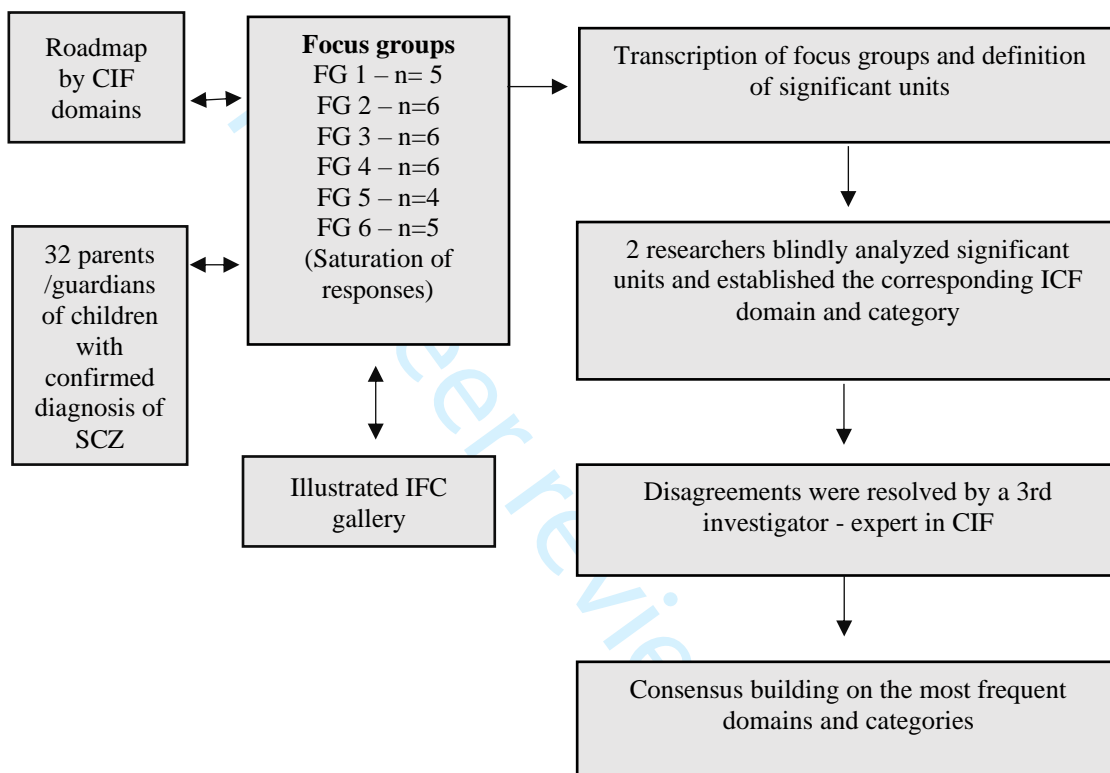



Figure 2 – Sociodemographic data of children

### Sociodemographic Data - Children

#### Structured Interview

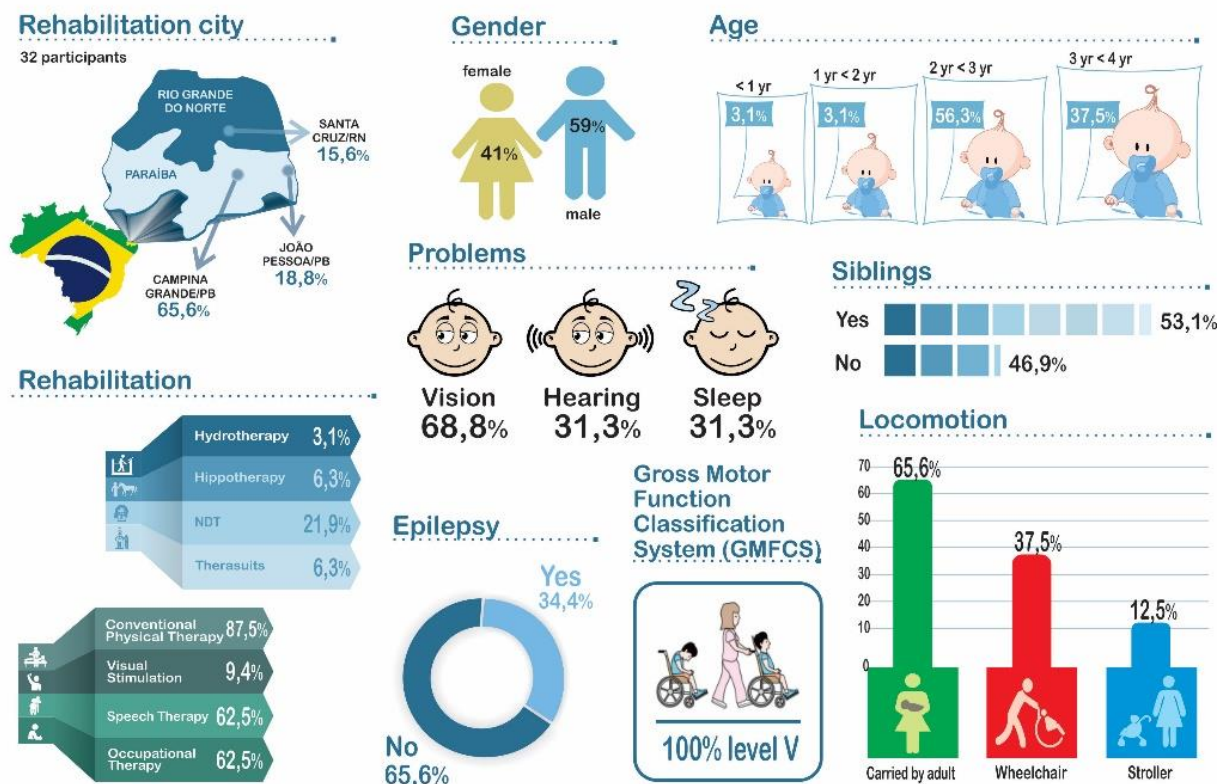

Figure 2 – Sociodemographic data of children

Figure 3 – Sociodemographic data for parent/caregivers

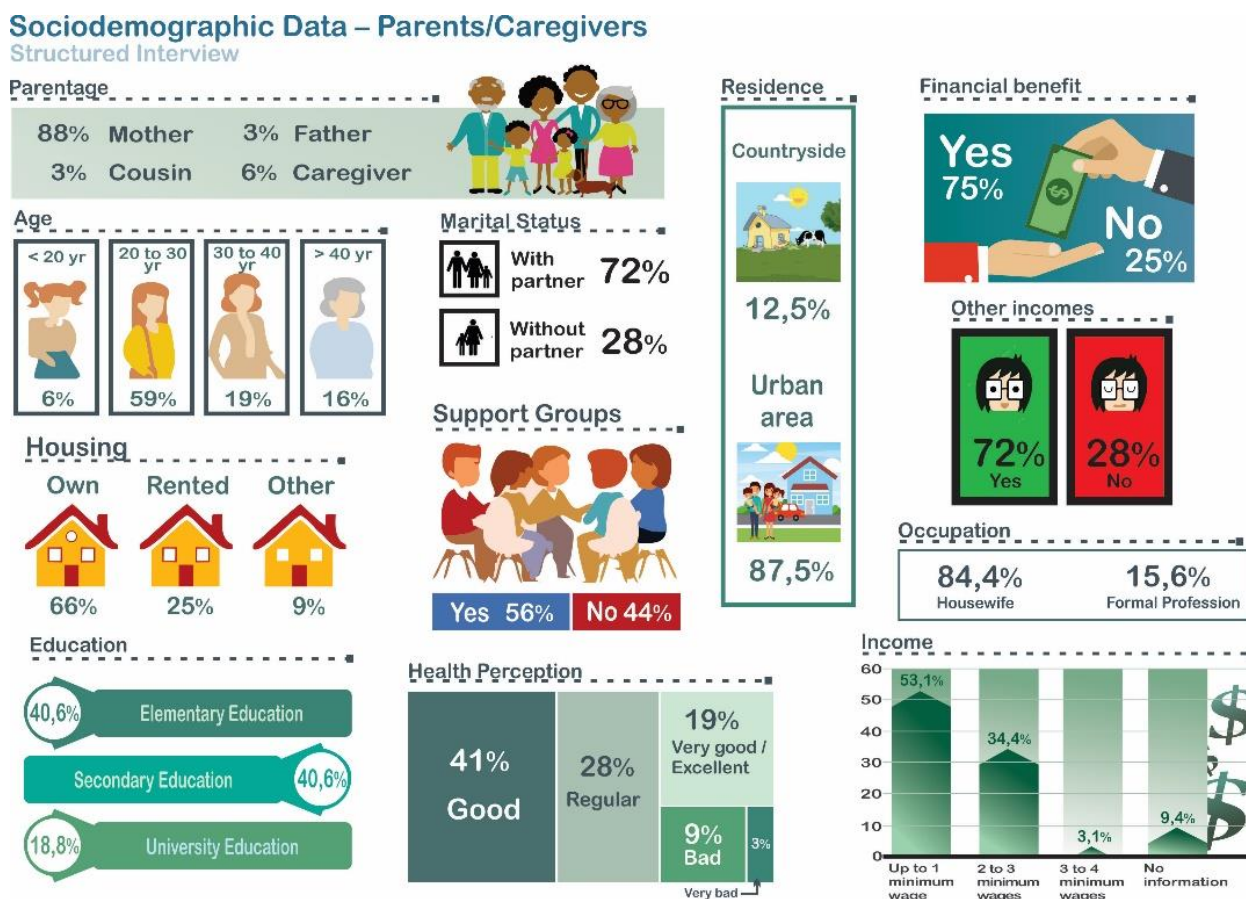

Figure 3 – Sociodemographic data for parent/caregivers

Figure 4: ICF categories representing the parents' perspective

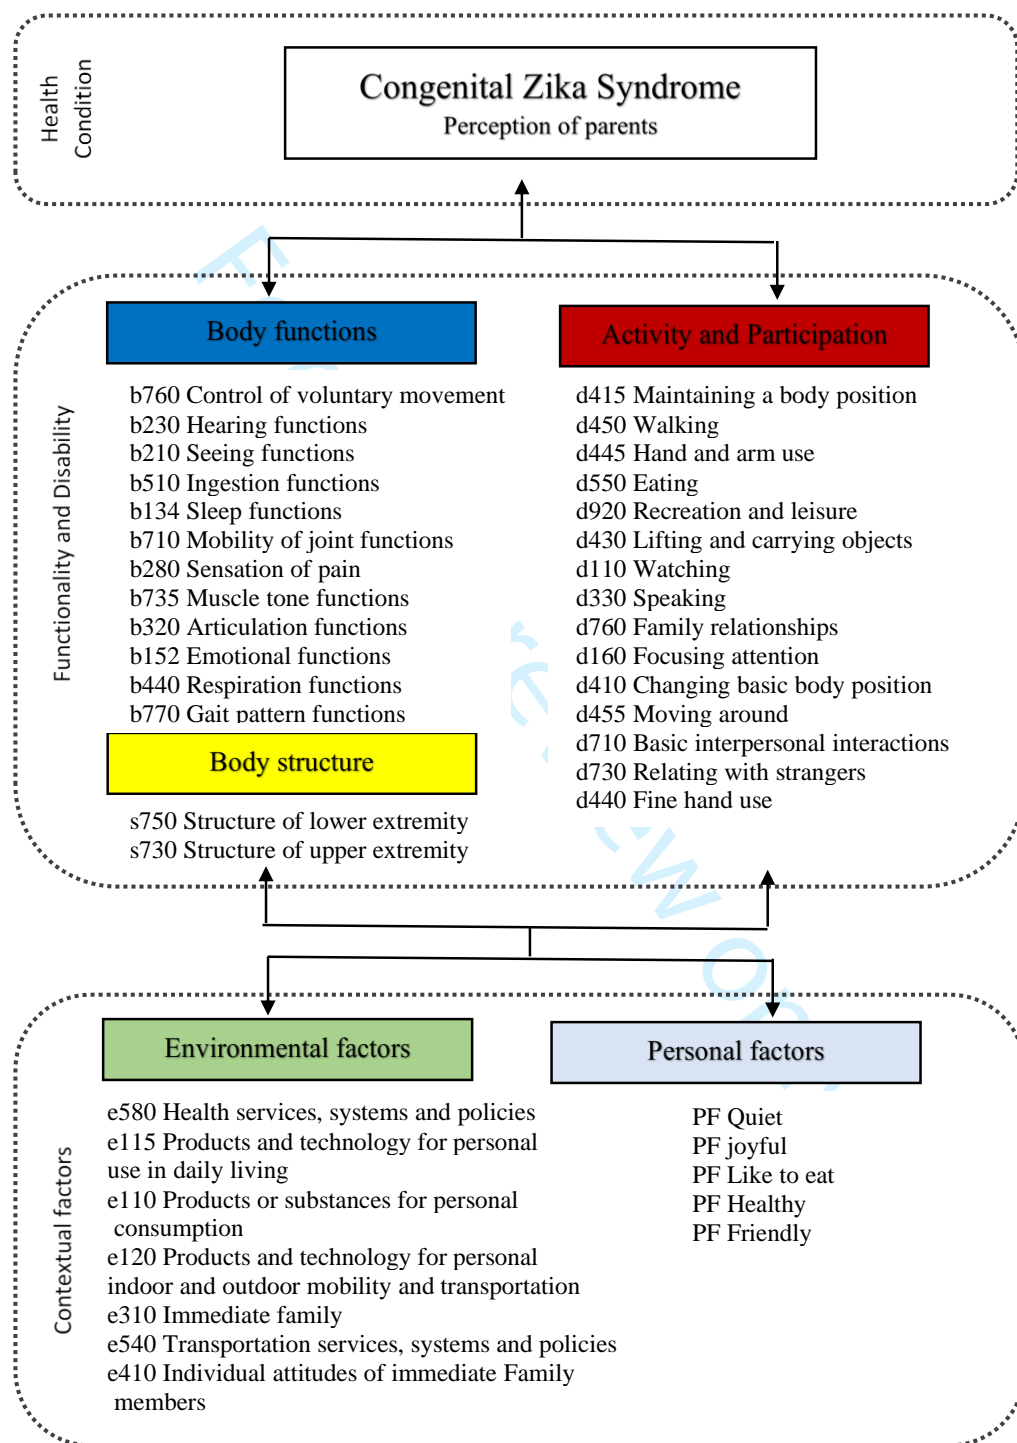

Figure 4: ICF categories representing the parents' perspective

## Supplementary material 1

**ZIKA FOCUS GROUPS****Aims of focus groups:**

To elicit **what outcomes** are considered important to parents and caregivers of children with Zika virus and therefore what should be included in an outcome measure.

**Population:**

Parents and/or Caregivers of children who have had infants born with congenital infections or similar conditions who have children from 0-10 years and who are willing to take part in a focus group. We will attempt to sample parents of children with a range of severity of disorders and will attempt to sample from both urban and rural settings.

**Framework:**

The ICF and ICF Core Sets for children and youth with CP will be used as an overarching framework to ensure a comprehensive representation of outcomes.

**Questionnaire:**

1. If you think about your child as an individual, what **personal characteristics** are important about him/her? (Moderator provide an example) **PERSONAL FACTORS**
2. If you think about the **daily activities**, (Moderator provide an example, show pictures of activities)
  - a. What activities your child is able to do?
  - b. What activities does your child find hard/difficult to do?
3. If you think about the **physical and social environment (family, school, and neighborhood)** of your child, (Moderator provide an example, show pictures, ask HOME, SCHOOL, COMMUNITY)
  - a. What do you find **helpful or supportive** in facilitating participation in different activities?
  - b. What **challenges or barriers** does your child experience?
4. If you think about the **body** of your child, which body parts cause your child some difficulties, if any? (Moderator provide an example, may be a picture of the body and they can mark areas with an X)
5. If you think about the **body** of your child, what parts of his/her body do not work the way it supposes to, if any? (Moderator provide an example, may be a list from the ICF Core Sets then they can mark functions from the list) **BODY FUNCTIONS**
6. Tell me about the **biggest problems** for you at the moment.
7. If people were looking into treatments for your child, what are the things you might **hope to improve:**
  - a. In terms of their **daily activities**?
  - b. In terms of making it **easier for your child to participate** in daily activities (in the neighbourhood, at home with the family and at school or nursery, if they attend)?

Supplementary material 2

Visual cards with images from the ICF illustrated gallery

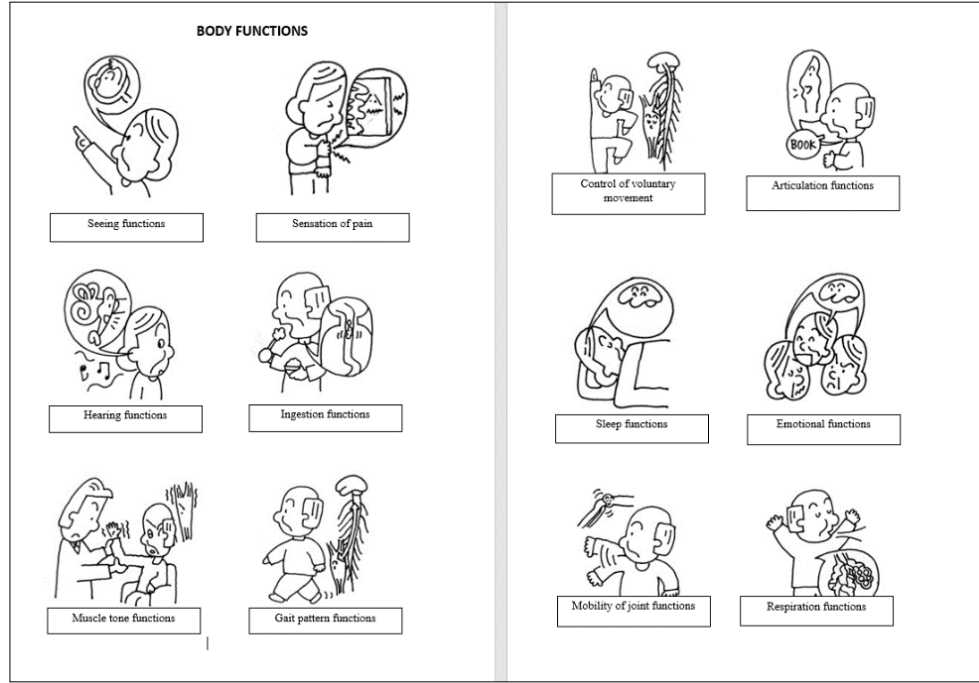

**Consolidated criteria for reporting qualitative studies (COREQ): 32-item checklist**

| <b>Domain 1: Research team and reflexivity</b> |                                          |                                                                                                                                                          |                                                                                                                                                                                                                                                                          |
|------------------------------------------------|------------------------------------------|----------------------------------------------------------------------------------------------------------------------------------------------------------|--------------------------------------------------------------------------------------------------------------------------------------------------------------------------------------------------------------------------------------------------------------------------|
| <b>Personal Characteristics</b>                |                                          |                                                                                                                                                          |                                                                                                                                                                                                                                                                          |
| 1                                              | Interviewer/facilitator                  | Which author/s conducted the interview or focus group?                                                                                                   | The first and the last authors conducted the focus groups.                                                                                                                                                                                                               |
| 2                                              | Credentials                              | What were the researcher's credentials? E.g. PhD, MD                                                                                                     | Msc Candidate - nurse; PhD- Physical Therapist.                                                                                                                                                                                                                          |
| 3                                              | Occupation                               | What was their occupation at the time of the study?                                                                                                      | Msc candidate - nurse; Professor.                                                                                                                                                                                                                                        |
| 4                                              | Gender                                   | Was the researcher male or female?                                                                                                                       | Female.                                                                                                                                                                                                                                                                  |
| 5                                              | Experience and training                  | What experience or training did the researcher have?                                                                                                     | She was training by the last author, who has a lot of experience conducting focus group in Brazil and Spain. She was following previous qualitative studies as a trainee before start her research.                                                                      |
| <b>Relationship with participant</b>           |                                          |                                                                                                                                                          |                                                                                                                                                                                                                                                                          |
| 6                                              | Relationship established                 | Was a relationship established prior to study commencement?                                                                                              | No.                                                                                                                                                                                                                                                                      |
| 7                                              | Participant knowledge of the interviewer | What did the participants know about the researcher? e.g. personal goals, reasons for doing the research                                                 | Participants were informed that they would be interviewed by a nurse who was conducting research in partnership with the university of liverpool, with the aim of developing a set of outcome measures for children with CZS.                                            |
| 8                                              | Interviewer characteristics              | What characteristics were reported about the interviewer/facilitator? e.g. Bias, assumptions, reasons and interests in the research topic                | Participants were informed that they would be interviewed by a nurse who was conducting research in partnership with the university of liverpool, with the aim of developing a set of outcome measures for children with CZS.                                            |
| <b>Domain 2: study design</b>                  |                                          |                                                                                                                                                          |                                                                                                                                                                                                                                                                          |
| <b>Theoretical framework</b>                   |                                          |                                                                                                                                                          |                                                                                                                                                                                                                                                                          |
| 9                                              | Methodological orientation and Theory    | What methodological orientation was stated to underpin the study? e.g. grounded theory, discourse analysis, ethnography, phenomenology, content analysis | The methodological orientation used for the study was the current model of the World Health Organization (WHO), the International Classification of Functioning (ICF). The data were analyzed considering the linking rules methodology proposed by Cieza et al. (2019). |
| <b>Participant selection</b>                   |                                          |                                                                                                                                                          |                                                                                                                                                                                                                                                                          |
| 10                                             | Sampling                                 | How were participants selected? e.g. purposive,                                                                                                          | Participants were purposively selected.                                                                                                                                                                                                                                  |

|                        |                              |                                                                                   |                                                                                                                                                                                                                   |
|------------------------|------------------------------|-----------------------------------------------------------------------------------|-------------------------------------------------------------------------------------------------------------------------------------------------------------------------------------------------------------------|
|                        |                              | convenience, consecutive, snowball                                                |                                                                                                                                                                                                                   |
| 11                     | Method of approach           | How were participants approached? e.g. face-to-face, telephone, mail, email       | Participants were invited via phone call or in person at the rehabilitation clinics. Participants were interviewed face to face, through focus groups.                                                            |
| 12                     | Sample size                  | How many participants were in the study?                                          | Six focus groups were conducted with 32 caregivers of children with severe neurodevelopmental disorders associated with CZS.                                                                                      |
| 13                     | Non-participation            | How many people refused to participate or dropped out? Reasons?                   | No one refused to participate or was absent during the interview.                                                                                                                                                 |
| <b>Setting</b>         |                              |                                                                                   |                                                                                                                                                                                                                   |
| 14                     | Setting of data collection   | Where was the data collected? e.g. home, clinic, workplace                        | Data were collected at the rehabilitation clinic linked to each participant.                                                                                                                                      |
| 15                     | Presence of non-participants | Was anyone else present besides the participants and researchers?                 | In the focus groups held in Campina Grande the psychologist accompanied the interviews.                                                                                                                           |
| 16                     | Description of sample        | What are the important characteristics of the sample? e.g. demographic data, date | Information on children are in the Figure 4 and the characteristics of the families are in the Figure 5.                                                                                                          |
| <b>Data collection</b> |                              |                                                                                   |                                                                                                                                                                                                                   |
| 17                     | Interview guide              | Were questions, prompts, guides provided by the authors? Was it pilot tested?     | A questionnaire adapted from a previous ICF-based qualitative study was used to conduct the focus group, covering the different ICF domains.                                                                      |
| 18                     | Repeat interviews            | Were repeat interviews carried out? If yes, how many?                             | In the sixth focus group, the content started to repeat itself, when the saturation criterion was established.                                                                                                    |
| 19                     | Audio/visual recording       | Did the research use audio or visual recording to collect the data?               | All groups were recorded and later transcribed in full.                                                                                                                                                           |
| 20                     | Field notes                  | Were field notes made during and/or after the interview or focus group?           | Yes, the researcher used a field diary.                                                                                                                                                                           |
| 21                     | Duration                     | What was the duration of the interviews or focus group?                           | The duration of the focus groups ranged from 60 to 90 minutes                                                                                                                                                     |
| 22                     | Data saturation              | Was data saturation discussed?                                                    | We continued to do focus groups until saturation was reached where the testimonies became repetitive, predictable, and were not providing any additional information. Saturation was achieved by the sixth group. |
| 23                     | Transcripts returned         | Were transcripts returned to participants for comment and/or correction?          | No                                                                                                                                                                                                                |

| <b>Domain 3: analysis and findingsz</b> |                                |                                                                                                                                   |                                                                                                                                                                                                                                                                                                                                                                                                                                                                                                                                                                                                                                                                                |
|-----------------------------------------|--------------------------------|-----------------------------------------------------------------------------------------------------------------------------------|--------------------------------------------------------------------------------------------------------------------------------------------------------------------------------------------------------------------------------------------------------------------------------------------------------------------------------------------------------------------------------------------------------------------------------------------------------------------------------------------------------------------------------------------------------------------------------------------------------------------------------------------------------------------------------|
| <b>Data analysis</b>                    |                                |                                                                                                                                   |                                                                                                                                                                                                                                                                                                                                                                                                                                                                                                                                                                                                                                                                                |
| 24                                      | Number of data coders          | How many data coders coded the data?                                                                                              | The transcribed content was analyzed by three researchers experienced in qualitative research (TC, EL, VS).                                                                                                                                                                                                                                                                                                                                                                                                                                                                                                                                                                    |
| 25                                      | Description of the coding tree | Did authors provide a description of the coding tree?                                                                             | They split the content into significant units with using NVIVO software, version 11.0 (QSR International, 2019), and associated them with each ICF domain and category using the WHO's linking rules (Cieza et al, 2019) as follows: TC and EL, trained in ICF, performed a blind reading of the content and established the ICF domain and category for each significant unit of the interview to which it was judged to be relevant. VS, a specialist in ICF and with extensive experience in childhood disability, analyzed the disagreements of the two researchers, establishing consensus in relation to the domain/category of the ICF regarding the significant units. |
| 26                                      | Derivation of themes           | Were themes identified in advance or derived from the data?                                                                       | The themes were identified from the study data using the ICF model.                                                                                                                                                                                                                                                                                                                                                                                                                                                                                                                                                                                                            |
| 27                                      | Software                       | What software, if applicable, was used to manage the data?                                                                        | NVIVO software, version 11.0 (QSR International, 2019).                                                                                                                                                                                                                                                                                                                                                                                                                                                                                                                                                                                                                        |
| 28                                      | Participant checking           | Did participants provide feedback on the findings?                                                                                | No.                                                                                                                                                                                                                                                                                                                                                                                                                                                                                                                                                                                                                                                                            |
| <b>Reporting</b>                        |                                |                                                                                                                                   |                                                                                                                                                                                                                                                                                                                                                                                                                                                                                                                                                                                                                                                                                |
| 29                                      | Quotations presented           | Were participant quotations presented to illustrate the themes / findings? Was each quotation identified? e.g. participant number | The participants' quotes were presented to illustrate the themes and identified with the initials of each participant.                                                                                                                                                                                                                                                                                                                                                                                                                                                                                                                                                         |
| 30                                      | Data and findings consistent   | Was there consistency between the data presented and the findings?                                                                | Yes.                                                                                                                                                                                                                                                                                                                                                                                                                                                                                                                                                                                                                                                                           |
| 31                                      | Clarity of major themes        | Were major themes clearly presented in the findings?                                                                              | Yes.                                                                                                                                                                                                                                                                                                                                                                                                                                                                                                                                                                                                                                                                           |
| 32                                      | Clarity of minor themes        | Is there a description of diverse cases or discussion of minor themes?                                                            | Yes.                                                                                                                                                                                                                                                                                                                                                                                                                                                                                                                                                                                                                                                                           |



# BMJ Open

## How Congenital Zika Virus impacted my child's functioning and disability: a Brazilian qualitative study guided by the ICF

|                                 |                                                                                                                                                                                                                                                                                                                                                                                                                                                                                                                      |
|---------------------------------|----------------------------------------------------------------------------------------------------------------------------------------------------------------------------------------------------------------------------------------------------------------------------------------------------------------------------------------------------------------------------------------------------------------------------------------------------------------------------------------------------------------------|
| Journal:                        | <i>BMJ Open</i>                                                                                                                                                                                                                                                                                                                                                                                                                                                                                                      |
| Manuscript ID                   | bmjopen-2020-038228.R1                                                                                                                                                                                                                                                                                                                                                                                                                                                                                               |
| Article Type:                   | Original research                                                                                                                                                                                                                                                                                                                                                                                                                                                                                                    |
| Date Submitted by the Author:   | 27-Aug-2020                                                                                                                                                                                                                                                                                                                                                                                                                                                                                                          |
| Complete List of Authors:       | Campos, Taynah; Universidade Federal do Rio Grande do Norte, Schiariti, Veronica; University of Victoria, Gladstone, Melissa; University of Liverpool Institute of Translational Medicine, Women and Children's Health<br>Melo, Adriana; Instituto de Pesquisa Professor Joaquim Amorim Neto<br>Tavares, Jousilene; Instituto de Pesquisa Professor Joaquim Amorim Neto<br>Magalhães, Adriana; Federal University of Rio Grande do Norte – UFRN-FACISA<br>Longo, Egmar; Universidade Federal do Rio Grande do Norte, |
| <b>Primary Subject Heading</b>: | Global health                                                                                                                                                                                                                                                                                                                                                                                                                                                                                                        |
| Secondary Subject Heading:      | Public health                                                                                                                                                                                                                                                                                                                                                                                                                                                                                                        |
| Keywords:                       | INFECTIOUS DISEASES, Public health < INFECTIOUS DISEASES, Developmental neurology & neurodisability < PAEDIATRICS                                                                                                                                                                                                                                                                                                                                                                                                    |
|                                 |                                                                                                                                                                                                                                                                                                                                                                                                                                                                                                                      |

SCHOLARONE™  
Manuscripts



I, the Submitting Author has the right to grant and does grant on behalf of all authors of the Work (as defined in the below author licence), an exclusive licence and/or a non-exclusive licence for contributions from authors who are: i) UK Crown employees; ii) where BMJ has agreed a CC-BY licence shall apply, and/or iii) in accordance with the terms applicable for US Federal Government officers or employees acting as part of their official duties; on a worldwide, perpetual, irrevocable, royalty-free basis to BMJ Publishing Group Ltd ("BMJ") its licensees and where the relevant Journal is co-owned by BMJ to the co-owners of the Journal, to publish the Work in this journal and any other BMJ products and to exploit all rights, as set out in our [licence](#).

The Submitting Author accepts and understands that any supply made under these terms is made by BMJ to the Submitting Author unless you are acting as an employee on behalf of your employer or a postgraduate student of an affiliated institution which is paying any applicable article publishing charge ("APC") for Open Access articles. Where the Submitting Author wishes to make the Work available on an Open Access basis (and intends to pay the relevant APC), the terms of reuse of such Open Access shall be governed by a Creative Commons licence – details of these licences and which [Creative Commons](#) licence will apply to this Work are set out in our licence referred to above.

Other than as permitted in any relevant BMJ Author's Self Archiving Policies, I confirm this Work has not been accepted for publication elsewhere, is not being considered for publication elsewhere and does not duplicate material already published. I confirm all authors consent to publication of this Work and authorise the granting of this licence.

1  
2  
3  
4 ***How Congenital Zika Virus impacted my child's functioning and disability: a Brazilian***  
5 ***qualitative study guided by the ICF***  
6

7  
8 Taynah Neri Correia Campos, Verónica Schiariti, Melissa Gladstone, Adriana Melo,  
9 Jousilene Sales Tavares, Adriana Gomes Magalhães & Egmar Longo

10  
11 **Correspondence to:**

12  
13 **Egmar Longo, PhD**  
14 **Graduate Program in Collective Health – Federal University of Rio Grande do Norte –**  
15 **UFRN-FACISA**  
16 **Rua Vila Trairi S/N, Centro, Santa Cruz, RN**  
17 **59200-000, Brazil, +5584 32912411**  
18 **egmarlongo@yahoo.es**  
19

20  
21  
22 Taynah Neri Correia Campos, MsC  
23 Graduate Program in Collective Health  
24 Federal University of Rio Grande do Norte – UFRN-FACISA  
25 Rua Vila Trairi S/N, Centro, Santa Cruz, RN  
26 59200-000, Brazil  
27

28  
29 Verónica Schiariti, PhD  
30 Adjunct Associate Professor – Division of Medical Sciences  
31 University of Victoria  
32 Victoria, BC, Canada  
33

34  
35 Melissa Gladstone, PhD  
36 Professor of International Child Health and Neurodevelopmental Paediatrics  
37 Department of Women and Children's Health  
38 Institute of Translational Medicine  
39 University of Liverpool  
40 Eaton Road, Liverpool, L12 2AP, UK  
41

42  
43 Adriana Melo, PhD  
44 Instituto de Pesquisa Professor Joaquim Amorim Neto  
45 Campina Grande – Paraiba Brazil  
46

47  
48 Jousilene Sales Tavares, PhD  
49 Instituto de Pesquisa Professor Joaquim Amorim Neto  
50 Campina Grande – Paraiba Brazil  
51

52  
53 Adriana Gomes Magalhães, PhD  
54 Graduate Program in Rehabilitation Sciences – Federal University of Rio Grande do Norte –  
55 UFRN-FACISA  
56 Rua Vila Trairi S/N, Centro, Santa Cruz, RN  
57 59200-000, Brazil  
58

59 **4.509 words**

60 **Keywords:** Zika Virus Infection. Zika Virus. International Classification of Functioning,  
Disability and Health. Measures of Association, Exposure, Outcome, child

## Abstract

**Introduction:** The Zika Virus outbreak in Brazil had devastating social, medical and financial consequences. Many researchers and clinicians are following up the children to understand the impact of the Zika on child development, functioning and disability, but outcome measures are heterogeneous, and it is not clear how meaningful they are to families and children. This study aimed to identify the parents' perspectives on relevant areas of functioning and disability that should be included as outcome measures for children with congenital Zika Syndrome (CZS), guided by the International Classification of Functioning, Disability and Health (ICF).

**Methods:** This qualitative study included parents or caregivers of children aged 0 to 5 years with confirmed CZS from two states in northeastern Brazil. Interviews were conducted using focus groups. Content mapping followed the WHO's ICF linking rules. Three raters analyzed the content using NVIVO 11.

**Results:** Thirty-two caregivers participated in six focus groups, 88% were mothers, average age 30 years. Most of their children were male (59%), all level V according to the Gross Motor Function Classification System (GMFCS). Overall, 825 themes were mapped to 36 ICF categories. Functioning and disability themes were predominantly linked to environmental factors, activities and participation, and body functions. Although parents mentioned areas across all ICF domains, they reported that areas of mobility, eating and recreation were very relevant for them. In addition, environmental factors were highly identified as barriers, specifically services, policies and access to assistive devices. The most predominant facilitators were immediate family support, kind relationships with therapists and extended family.

**Conclusions:** Although parents emphasized issues related to mobility, their greatest concerns involved environmental factors, such as access and quality of health and social services, systems and policies. These results reinforce the importance of including the parents' perspective when selecting or developing outcome measures for CZS.

#### Strengths and limitations of this study

- This is the first ICF-based qualitative study describing caregivers' perceptions on relevant areas of function in children with CZS in Brazil.
- Several ICF categories were identified by parents as very relevant which contribute to the creation of a set of main outcomes for rehabilitation interventions.
- A limitation is the misrepresentation of fathers' perspectives, as the majority of participants were mothers.

## INTRODUCTION

The Zika virus (ZIKV) was identified in Brazil at the beginning of 2015. Concurrently, rates of microcephaly and other congenital brain abnormalities increased, thus suggesting a causal relationship between this congenital infection and the clinical presentation.<sup>1</sup> Since then, clinical reports have documented the teratogenic effect of ZIKV in pregnant women, particularly with infection in the first trimester.<sup>2,3,4</sup> The most prominent among the congenital anomalies is microcephaly, but other manifestations such as; spasticity, seizures, eating difficulties, irritability, ocular abnormalities, hearing loss, calcifications, cortical disorders and ventriculomegaly in neuroimaging have been described, suggesting a new syndrome, called the Congenital Zika Syndrome (CZS).<sup>5,6,7</sup> There is still no complete definition of the scope of this new health condition, and adequate outlines are still needed. As a result, surveillance systems are aware of a wider spectrum of congenital malformations which may be associated with ZIKV infection.<sup>8,9</sup>

A precise estimate of the ZIKV infection incidence is difficult to determine due to the variations between countries regarding the commitment to notifications and the small number of individuals who manifest the health condition caused by ZIKV.<sup>10</sup> There are currently 3,406 confirmed cases of children with microcephaly and/or other neurological signs due to CZS in Brazil, with a further 2,596 cases under investigation.<sup>11</sup>

Given the severity of the syndrome, the scientific community has mobilized efforts to understand the mechanisms of this health condition and to establish outcome measures, to define what should be measured and reported in all trials in this area. As such, creating a standardized core outcome set (COS) for CZS will reduce the heterogeneity of the studies and the result bias, and further enable development of meta-analyses and data sharing between the studies.<sup>12</sup>

1  
2  
3  
4 The Core Outcomes Measures in Effectiveness Trials (COMET) initiative identifies and  
5 disseminates the most relevant outcomes for each clinical health situation through a database  
6 and recommends (among other aspects) the involvement of families in developing these  
7 outcomes to ensure that the research process is more relevant and appropriate to the patient's  
8 needs.<sup>13, 14</sup> As part of the COS developing process, parents are encouraged to describe their  
9 children's strengths and weaknesses following the International Classification of Functioning,  
10 Disability and Health (ICF) biopsychosocial model.<sup>14</sup> The ICF can be used as a guiding  
11 framework providing a common language for describing the dynamic interaction between the  
12 person functional abilities and the role of the environment.<sup>15</sup>  
13  
14  
15  
16  
17  
18  
19  
20  
21  
22  
23  
24  
25

26 Currently, there is no COS for children with CZS. To fill this gap, we are developing  
27 the "Zika COS and congenital infections: a study to develop a COS for children with CZS and  
28 other congenital infections" project. This project is coordinated by the University of Liverpool  
29 in partnership with the University of Victoria (Canada) and Federal University of Rio Grande  
30 do Norte - UFRN-FACISA (Brazil). This paper describes a qualitative study that is part of the  
31 1<sup>st</sup> phase of the COS for CZS project.<sup>16</sup> The specific objective of this qualitative study is to  
32 identify the parents' perspectives on relevant areas of functioning and disability which should  
33 be included as outcome measures for children with CZS, guided by the ICF.  
34  
35  
36  
37  
38  
39  
40  
41  
42  
43  
44  
45  
46

## 47 **METHODS**

48  
49 This study used a qualitative methodology with an exploratory approach through focus  
50 groups. We chose to use a qualitative approach as it enables investigation and in-depth  
51 understanding of the perspectives and experiences of parents/caregivers of children with CZS.  
52 Focus groups, in particular, provide the potential to explore and clarify points of view and reveal  
53  
54  
55  
56  
57  
58  
59  
60

1  
2  
3  
4 dimensions of understanding which would be less easily accessible in other data collection  
5  
6 formats.<sup>17, 18</sup>  
7  
8  
9

10 This research was approved by the Ethics and Research Committee of the Faculty of  
11 Health Sciences of Trairi/Federal University of Rio Grande do Norte (2.357.552), it was also  
12 re-approved at Liverpool University Ethics Committee (#2083) and developed in three  
13 Brazilian rehabilitation centers for CZS in the states of Rio Grande do Norte (Physical Therapy  
14 School Clinic at UFRN-FACISA, in Santa Cruz) and Paraíba (Center for the Care of Children  
15 with Microcephaly at the Professor Joaquim Amorim Neto Research Institute - IPESQ, in  
16 Campina Grande, and Physical Therapy School Clinic at UNIPE, in Joao Pessoa).  
17 Parents/guardians signed a Consent Form after being provided with an information sheet which  
18 was read out to them. Parents also signed an authorization for Voice Recording and use of  
19 images (considering Resolution 466/2012 of the National Health Council which provides for  
20 regulatory guidelines and standards for human research).  
21  
22  
23  
24  
25  
26  
27  
28  
29  
30  
31  
32  
33  
34  
35

36 Participants with important common characteristics were purposively selected by  
37 members of the research team, through active search by phone call or direct personal approach.  
38 The inclusion criteria included: 1) being parents/caregivers of children with confirmed  
39 diagnosis of CZS by polymerase chain reaction (PCR) or presumed diagnosis based on obstetric  
40 ultrasound, transfontanellar ultrasound, computed tomography (CT) and magnetic resonance  
41 imaging (MRI), 2) who were aged zero to five years, and 3) who lived in the area covered by  
42 the study (states of Rio Grande do Norte and Paraíba) and attended the respective rehabilitation  
43 services.  
44  
45  
46  
47  
48  
49  
50  
51  
52  
53  
54

55 The habilitation centers are public services linked to research institutions and higher  
56 education in the region. This study did not include parents whose children had congenital  
57 syndromes due to other etiologies.  
58  
59  
60

1  
2  
3  
4 All parents responded to a sociodemographic questionnaire, applied by the researchers  
5 before the realization of the focus groups, at rehabilitation services, with information about their  
6 relationship with the child, marital status, age, income, government benefit, education, housing  
7 and self-reported health, in addition to information from children about gender, age, mobility,  
8 rehabilitation, frequency day care centers or schools, and difficulties with vision, hearing, sleep  
9 and epilepsy. This questionnaire was applied to the first group and observed whether the  
10 questions were well understood by the respondents. Two research assistants were involved in  
11 the data collection. In each center, the physiotherapist who accompanied the children classified  
12 their motor abilities using the GMFCS. This is an age-specific scheme designed for children  
13 with cerebral palsy (CP) based on five levels of gross motor function, ranging from level I (most  
14 able) to level V (least able)<sup>19</sup> and provided some clear information on the severity of the children  
15 whose parents took part in the study. The study flowchart can be viewed in Figure 1. The  
16 consolidated criteria for notification of qualitative studies (COREQ) guidelines were  
17 considered.

18  
19  
20  
21  
22  
23  
24  
25  
26  
27  
28  
29  
30  
31  
32  
33  
34  
35  
36  
37 The focus groups were carried out between September/2018 and January/2019, by  
38 research assistants (TC, EL), trained both in qualitative studies and in conducting focus groups.  
39 We continued to do focus groups until saturation was reached - where the testimonies became  
40 repetitive, predictable, and were not providing any additional information. Saturation was  
41 achieved by the sixth group. Furthermore, we decided not to exceed six parents/caregivers per  
42 group in order to enable effective participation of the participants and appropriate discussion of  
43 themes. Of the 36 parents identified and invited to the study, 32 agreed to participate.

44  
45  
46  
47  
48  
49  
50  
51  
52  
53  
54 A questionnaire adapted from a previous ICF-based qualitative study was used to  
55 conduct the focus group, covering the different ICF domains (Supplementary material 1).<sup>20</sup>  
56  
57  
58  
59  
60  
Visual tags were produced with images from the ICF illustrated gallery (Supplementary



1  
2  
3  
4 material 2)<sup>21</sup> to assist in understanding the concepts, as studies indicate that visualization has  
5 the potential to support data production during the qualitative interview process.<sup>22</sup> The duration  
6 of the focus groups ranged from 60 to 90 minutes. The participants were given a therapeutic  
7 toy developed by research team at the end of the groups, called “fun fishing”, in order to thank  
8 the parents for participating in the study. They were encouraged by the professional team to use  
9 it as one therapeutic toy for stimulation of their children at home and promote fun. All groups  
10 were recorded and later transcribed in full. Names and identification characteristics were  
11 excluded from the transcripts. The transcribed content was analyzed by three researchers  
12 experienced in qualitative research (TC, EL, VS). They split the content into significant units  
13 with using NVIVO software, version 11.0 (QSR International, 2019), and associated them with  
14 each ICF domain and category using the WHO’s linking rules<sup>23</sup> as follows: TC and EL, trained  
15 in ICF, performed a blind reading of the content and established the ICF domain and category  
16 for each significant unit of the interview to which it was judged to be relevant. VS, a specialist  
17 in ICF and with extensive experience in childhood disability, analyzed the disagreements of the  
18 two researchers, establishing consensus in relation to the domain/category of the ICF regarding  
19 the significant units.

20  
21  
22  
23  
24  
25  
26  
27  
28  
29  
30  
31  
32  
33  
34  
35  
36  
37  
38  
39  
40  
41  
42 Next, the content was analyzed by the researchers who interpreted the data through an  
43 inductive and deductive analysis process based on a permanent dialogue throughout the process  
44 to ensure consistency and reliability of the interpretations. Any verbatim which did not exceed  
45 “five mentions” was discarded as it was felt not to be representative enough of the data. The  
46 frequency of each ICF category in the statements of parents / caregivers was used as a parameter  
47 to determine the order of importance of ICF domains/categories. After this process, the content  
48 was translated from Brazilian Portuguese into English by a bilingual member of the research  
49 team and the content checked by two others, to ensure that there was no loss of meaning.  
50  
51  
52  
53  
54  
55  
56  
57  
58  
59  
60

1  
2  
3  
4 Aspects of credibility, transferability, reliability and confirmability were considered  
5 during all stages in order to guarantee the quality of the qualitative research.<sup>24</sup> Credibility was  
6 ensured by thoroughly conducting six focus groups until response saturation was reached, with  
7 subsequent blind analysis, review and triangulation, and then a consensus was reached after  
8 meetings and debates regarding the interpretation of results. The researchers have general  
9 experience and robust training in the area of childhood disabilities and in the use of the ICF for  
10 neuro disabilities. Transferability occurred through observation of the rigor to which the  
11 research group stopped to describe how the data was obtained through the focus groups, the  
12 selection and description of the sample, which in this case involved the participants. Reliability  
13 was guaranteed by detailing the data collection processes, presenting the multiple steps  
14 followed by the researchers, and showing how the pair analysis and data interpretation took  
15 place. A measure of reliability through using the kappa statistic was also used to verify the  
16 agreement between the judges, with results indicating almost perfect agreement (0.916)  
17 considering the 95% confidence intervals. Finally, verification was achieved through a peer  
18 discussion of the data at each stage of the analysis by the research team.  
19  
20  
21  
22  
23  
24  
25  
26  
27  
28  
29  
30  
31  
32  
33  
34  
35  
36  
37  
38  
39  
40  
41  
42

43 **Patient and public involvement:** Families were not involved in the design, recruitment or  
44 conduct of the study. However, the results will be presented to families, professionals and  
45 managers at each participating center, with a view to discussing strategies to meet the needs of  
46 children with CZS and their families.  
47  
48  
49  
50  
51  
52  
53  
54  
55  
56  
57  
58  
59  
60

## RESULTS

Six focus groups were conducted with 32 caregivers of children with severe neurodevelopmental disorders associated with CZS. Information related to children can be found in Figure 2 and the characteristics of families are in Figure 3. The average age of the children was 32.5 (SD = 6.2) months, with a predominance of males and all of them had severe motor impairment, according to the GMFCS. Although none of the children walked, only 37.5% of them had a wheelchair.

Thirty-six categories of the ICF were identified, as demonstrated in Figure 4 (personal factors were expressed only minimally). This figure represents the parents' perspectives on relevant areas of functioning and disability of their children.

The parents mentioned relevant areas that covered all ICF domains, but a greater diversity of categories was observed in the domains of activities and participation and body functions. However, the environmental factors domain led the ranking of 12 categories, as can be seen in Table 1.

| CATEGORY                                                                                    | QTY | DOMAIN                       |
|---------------------------------------------------------------------------------------------|-----|------------------------------|
| 1° e580 Health services, systems and policies                                               | 59  | Environmental Factors        |
| 2° b760 Control of voluntary movement functions                                             | 37  | Body Functions               |
| 3° e115 Products and technology for personal use in daily living                            | 33  | Environmental Factors        |
| 4° d415 Maintaining a body position                                                         | 33  | Activities and Participation |
| 5° e110 Products or substances for personal consumption                                     | 31  | Environmental Factors        |
| 6° b230 Hearing functions                                                                   | 31  | Body Functions               |
| 7° b134 Sleep functions                                                                     | 31  | Body Functions               |
| 8° d450 Walking                                                                             | 28  | Activities and Participation |
| 9° e120 Products and technology for personal indoor and outdoor mobility and transportation | 25  | Environmental Factors        |
| 10° b210 Seeing functions                                                                   | 24  | Body Functions               |
| 11° d445 Hand and arm use                                                                   | 23  | Activities and Participation |
| 12° s750 Structure of lower extremity                                                       | 22  | Body Structures              |

Table 1: Table demonstrating the ranking of the 12 most frequent categories of the ICF mentioned by parents

Table 2 shows the distribution of categories related to the environmental factors domain in detail.

| <b>Environmental Factors</b> |                                                                                     |     |        |
|------------------------------|-------------------------------------------------------------------------------------|-----|--------|
| e580                         | Health services, systems and policies                                               | 59  | 33,0%  |
| e115                         | Products and technology for personal use in daily living                            | 33  | 18,4%  |
| e110                         | Products or substances for personal consumption                                     | 31  | 17,3%  |
| e120                         | Products and technology for personal indoor and outdoor mobility and transportation | 25  | 14,0%  |
| e310                         | Immediate Family                                                                    | 16  | 8,9%   |
| e540                         | Transportation services, systems and policies                                       | 9   | 5,0%   |
| e410                         | Individual attitudes of immediate family members                                    | 6   | 3,4%   |
| TOTAL                        |                                                                                     | 179 | 100,0% |

Table 2: Table of areas of the ICF considered important for parents within the area of Environmental factors

Among the categories, **Health services, systems and policies** (e580) was the barrier most expressed by parents and received 59 mentions. This category includes the prevention and treatment of health problems, the provision of rehabilitation services and the promotion of a healthy lifestyle. In the following verbatim, it is possible to observe the mother's desire to have access to a rehabilitation service in his own city.

*“Also that in Alagoas state has been the same possibilities that here in Campina, to don't need to move from one place to other, it's so complicated spend 3 months here, searching treatment that there it should have. I don't know they can't leave this treatment there, to every states have, for us don't need to move a lot to do a treatment. For them could at least sit, maintain their trunk, catch and walk.”* Mother 20.

Another barrier reported by parents/caregivers was the lack of information, professionals specialized in the management of CZS and the difficulty in transport to travel to rehabilitation services in other larger cities. Examples of this are evidenced in the statements below.

1  
2  
3  
4  
5  
6  
7  
8  
9  
10  
11  
12  
13  
14  
15  
16  
17  
18  
19  
20  
21  
22  
23  
24  
25  
26  
27  
28  
29  
30  
31  
32  
33  
34  
35  
36  
37  
38  
39  
40  
41  
42  
43  
44  
45  
46  
47  
48  
49  
50  
51  
52  
53  
54  
55  
56  
57  
58  
59  
60

*“I guess that it would help a lot if the access is facilitated, on your city, if I have physiotherapy on my city, sure I would go more often.”* Mother 03.

*“I would like science produces medicines for this disease, because is a new disease. Other thing, my great difficulty is absent of answers, you go to see a doctor with a child, and doctor is stalling, he never says the reality for you.”* Mother 24.

*“If our city would have the treatment, moving is tiring. And if when we arrive would be taken care. We suffer some experiences, in some days I spent many hours.”* Mother 04.

Some parents pointed to assistive products and technologies as facilitators. They described how adapted or specially designed equipment improved the functioning of their children and contributed to greater participation;

*“For E\* which facilitates activities it’s on first the glasses, because I take her glasses and the vision been worse, put the glasses and she animates.”* Mother 06.

The support of the nuclear family was expressed by participants of all focus groups always as a facilitator of the environment, as described below.

*“What does facilitate? I have a lot of support from my husband and my sister. I live close to my sister, my parents don’t live in the same city than I, but they always are present, always, until the beginning they are present. My family helps me a lot, and this helps me, when I want to go out and can’t take she together, I leave her with my sister. Then, the family support it’s the main factor that facilitates, because alone, it’s hard.”* Mother 14.

Table 3 presents the categories referring to the activities and participation domain.

| <b>Activities and Participation</b>   |     |        |
|---------------------------------------|-----|--------|
| d415 Maintaining a body position      | 33  | 14,5%  |
| d450 Walking                          | 28  | 12,3%  |
| d445 Hand and arm use                 | 23  | 10,1%  |
| d550 Eating                           | 21  | 9,3%   |
| d920 Recreation and leisure           | 19  | 8,4%   |
| d430 Lifting and carrying objects     | 15  | 6,6%   |
| d110 Watching                         | 15  | 6,6%   |
| d330 Speaking                         | 12  | 5,3%   |
| d760 Family relationships             | 11  | 4,8%   |
| d160 Focusing attention               | 11  | 4,8%   |
| d410 Changing basic body position     | 9   | 4,0%   |
| d455 Moving around                    | 9   | 4,0%   |
| d710 Basic interpersonal interactions | 8   | 3,5%   |
| d730 Relating with strangers          | 7   | 3,1%   |
| d440 Fine hand use                    | 6   | 2,6%   |
| TOTAL                                 | 227 | 100,0% |

Table 3: Table demonstrating areas of the ICF within Activity and participation found as important to parents

As shown in Table 3, the most expressive categories were those related to movement, such as **Maintaining a body position - d415**, **Walking - d450**, and **Hand and arm use - d445**. Such aspects were pointed out by the parents as being responsible for limiting activity and restricting participation in daily activities, as evidenced in the statements below.

*“M\* has difficulty to maintain the body position, when I put him stand position supported on the wall he can stay a long time. Sit, he also doesn’t sit alone, but if you put him, he stays, he creeps in, rolls. He doesn’t go to lying down position to sitting, but to sitting to lying he can.”* Mother 15.

*“Eat, she holds but doesn’t know how put it in her mouth.”* Mother 01.

*“His major difficulties are to catch things, he doesn’t catch, we need to put in his hand, than he holds, if he needs to pick up some think, he doesn’t do, holds if I open his hand he catches, because is difficult for him to open his hand”* Mother 08.

1  
2  
3  
4  
5  
6  
7  
8  
9  
10  
11  
12  
13  
14  
15  
16  
17  
18  
19  
20  
21  
22  
23  
24  
25  
26  
27  
28  
29  
30  
31  
32  
33  
34  
35  
36  
37  
38  
39  
40  
41  
42  
43  
44  
45  
46  
47  
48  
49  
50  
51  
52  
53  
54  
55  
56  
57  
58  
59  
60

*“I guess it’s too hard these children who doesn’t walk, doesn’t sit yet, if when arrive in some place and it has a wheelchair, if have how to sit him, but he doesn’t sit. My great problem is his weight, it’s my concern.”* Mother 17.

Finally, the areas of Body Function and Structure identified most by parents is shown in Table 4.

| <b>Body Functions</b>                        |              |            |             |
|----------------------------------------------|--------------|------------|-------------|
| b760 Control of voluntary movement functions | 37           | 16,70%     |             |
| b230 Hearing functions                       | 31           | 14,00%     |             |
| b210 Seeing functions                        | 24           | 10,80%     |             |
| b510 Ingestion functions                     | 19           | 8,60%      |             |
| b134 Sleep functions                         | 31           | 14,00%     |             |
| b710 Mobility of joint functions             | 18           | 8,10%      |             |
| b280 Sensation of pain                       | 16           | 7,20%      |             |
| b735 Muscle tone functions                   | 15           | 6,80%      |             |
| b320 Articulation functions                  | 10           | 4,50%      |             |
| b152 Emotional functions                     | 8            | 3,60%      |             |
| b440 Respiration functions                   | 7            | 3,20%      |             |
| b770 Gait pattern functions                  | 6            | 2,70%      |             |
|                                              | <b>TOTAL</b> | <b>222</b> | <b>100%</b> |
| <b>Body Structures</b>                       |              |            |             |
| s750 Structure of lower extremity            | 22           | 78,60%     |             |
| s730 Structure of upper extremity            | 6            | 21,40%     |             |
|                                              | <b>TOTAL</b> | <b>28</b>  | <b>100%</b> |

Table 4: Table demonstrating the categories of d Body Functions and Structures (within the ICF) identified as important by parents

Regarding the body function domain, there was a predominance of the category related to the **Control of voluntary movement - b760**. Many parents expressed concerns about voluntary movements, both simple and more complex, coordination, support functions of the upper and lower limbs and right-left motor coordination, as shown below in this mother’s speech.

1  
2  
3  
4  
5  
6  
7  
8  
9  
10  
11  
12  
13  
14  
15  
16  
17  
18  
19  
20  
21  
22  
23  
24  
25  
26  
27  
28  
29  
30  
31  
32  
33  
34  
35  
36  
37  
38  
39  
40  
41  
42  
43  
44  
45  
46  
47  
48  
49  
50  
51  
52  
53  
54  
55  
56  
57  
58  
59  
60

*“Movements control, L\* has a lot of difficulties, she can't lift her arm, her hand. About mobility function, she also has difficulties, she can't lift her arm and hand, she doesn't have a lot problems with her legs, but can't move.”* Mother 24.

As shown below, parents also pointed out problems related to **Hearing functions - b230, Seeing functions - b210 and Sleep functions - b134.**

*“The listen function doesn't work well , only in one side , in the other it doesn't work , we would make a raffle to earn money and buy a device , because on exam showed that the left one he listens, but on the right he doesn't anything.”* Mother 22.

*“About vision function, he doesn't see everything, his vision is low, he has difficulties.”* Father 01.

*“He has sleep difficulties, but when he falls on sleep (begins to sleep) he sleeps the whole night.”* Mother 28.

For “body structure”, the category relating to **Structure of lower extremity - s750** most commonly emerged within the parent focus groups. Many parents described issues with foot positioning and how this prevented walking and standing.

*“The knees, because she could crawl and it something that I guess she won't do. And her feet, to can walk, that will be a great difficulty, because she has a dislocation, we don't know if she will walk or if she will need a wheelchair for the rest of her life.”* Mother 27.

*“About S\* is his little foot, when I will put him on stand up position, his foot turn to the side.”* Mother 10.

## DISCUSSION

This is a pioneering research which revealed the perceptions of parents and caregivers regarding the aspects considered relevant in children with CZS based on the ICF model. Parents/caregivers highlighted the importance of environmental factors and motor function for



1  
2  
3  
4 the follow-up of children with CZS and it deserves be considerate in constructing core outcome  
5 set of measures for this health condition. The use of the ICF as a guide for this study enabled  
6  
7 us to provide a holistic model which enables the care perspective to be extended beyond  
8  
9 problems with body functions and structures in children with CZS.  
10  
11  
12

13  
14  
15 Despite the number of new cases becoming more stabilized, the complex clinical  
16 presentation of CZS and its effect on children's developmental trajectories requires  
17 standardized and individualized care during their growth.<sup>25</sup> It also requires researchers to  
18 consider a holistic approach and the complex needs of children with neurodevelopmental  
19 disabilities.<sup>26</sup>  
20  
21  
22  
23  
24  
25

26  
27 Several ICF categories were identified by parents as very relevant for them and their  
28 lives and these need to be considered within a global context for the creation of COS for CZS  
29 for implementing rehabilitation interventions.<sup>27</sup> The role of environmental factors in the  
30 statements of parents reflects the real need to include the context as an aspect to be assessed in  
31 the follow-up of children with CZS.<sup>28, 29</sup> Barriers such as those relating to the lack of specialized  
32 professionals need to be addressed.<sup>30</sup> Parents expressed a great need for information about the  
33 condition of their children.<sup>31</sup> The Centers for Disease Control and Prevention (CDC) has  
34 produced a pocket guide summarizing pediatric guidelines on initial assessment and outpatient  
35 treatment for CZS,<sup>32</sup> but a carefully planned public health approach, improving the ability to  
36 anticipate needs, providing adequate care and ensuring that children reach their full potential is  
37 still lacking.<sup>33, 34</sup> This is particularly crucial to really address the environmental issues which  
38 hinder many parents and families' every day functioning.  
39  
40  
41  
42  
43  
44  
45  
46  
47  
48  
49  
50  
51  
52  
53  
54

55  
56 Many parents/caregivers in our study expressed a desire to receive all treatments and  
57 support in a single place or city. Moving from place to place for services and different types of  
58  
59  
60

1  
2  
3  
4 rehabilitation in different places/cities is a real barrier for families. Parents in our study signaled  
5 a definite need for reorganizing health services in order to provide more of a “one stop”  
6  
7 approach to supporting them. This same aspect has been highlighted in other studies.<sup>35</sup> The lack  
8  
9 of access to services, mainly due to distance, cost and lack of availability has been a big need  
10  
11 expressed by families of children with SCZ as well as families with children with CP.<sup>36</sup> From  
12  
13 our study, it is clear that services for support and rehabilitation in a single location minimize  
14  
15 problems such as low attendance and/or avoidance. Lack of attendance of course interferes  
16  
17 hugely with creating good outcomes through focused, context-based and evidence-based  
18  
19 rehabilitation.<sup>37</sup>  
20  
21  
22  
23  
24  
25

26 Parents who took part in our study voiced particular concerns around aspects of their  
27  
28 children’s movement. This permeated the domains of activities and participation, functions and  
29  
30 body structure and was, of course, expressed as a limiting factor in their participation in daily  
31  
32 and leisure activities. It was clear that parents were disappointed and were desperate for a  
33  
34 change in mobility of their children and had had little counselling about adaptations to support  
35  
36 children in their daily lives through other means. The focus still seems to be on the perspective  
37  
38 of “fixing” the disability through therapies.<sup>38</sup>  
39  
40  
41  
42

43 Alongside this, parents voiced their desires relating to gait acquisition (walking) in the  
44  
45 context of their comparison of their children with typical children. This is well documented in  
46  
47 previous research with children with CP.<sup>39</sup> We know that many parents who have children who  
48  
49 will never walk often still resist early introduction of mobility aids such as adapted toy cars  
50  
51 despite the fact that studies involving children with CP with severe motor impairment  
52  
53 demonstrate positive results using these adaptations in terms of autonomy, self-esteem, social  
54  
55 skills and participation.<sup>40</sup> At the same time, a recent study has shown that promoting  
56  
57  
58  
59  
60

1  
2  
3  
4 participation can result in improved body function and structure in children and young people  
5  
6 with physical disabilities.<sup>41</sup>  
7  
8  
9

10 Our findings also showed that parents concentrate on the child's impairments and  
11  
12 parents have high expectations for healing or a cure. Unfortunately, in Brazil, there is little  
13  
14 acceptance of disabled children for what they are within their context. This negative view of  
15  
16 disability is common for parents with children with similar conditions,<sup>42</sup> with parents tending  
17  
18 to focus on their children's performing daily activities, and environmental barriers at home,  
19  
20 school and in the community. This shows that there is a need for actions including education at  
21  
22 a local and national level to change attitudes towards disability, for example using accessible  
23  
24 and open access educational tools such as MY ABILITIES FIRST.<sup>43</sup>  
25  
26  
27  
28

29 Our research has demonstrated what areas of the ICF parents of children with congenital  
30  
31 infections such as CZS consider important. This is extremely important when attempting to  
32  
33 establish a COS for CZS. We know that it is essential to also consider the child's own  
34  
35 perspective as to what he/she considers to be relevant in outcome measures, however, children  
36  
37 with CZS in this case are not yet old enough to express their opinions.  
38  
39  
40

41 We also acknowledge that parents' perceptions of the needs of their children with CZS  
42  
43 will change throughout their lives, and adaptations and further studies will be needed.  
44  
45 Professionals will need to remain vigilant as scientific knowledge about the impact of CZS will  
46  
47 evolve in the coming years.<sup>44</sup> However, due to the similarity with CP, it is known that in the  
48  
49 early years it is important to stimulate the child's development and support caregivers, and over  
50  
51 time to support inclusion, independent living, maintaining health and function.<sup>36</sup>  
52  
53  
54  
55

56 The results obtained in this study must be interpreted taking into account some  
57  
58 limitations. The sample was extracted from three Brazilian cities, from public or not-for profit  
59  
60

1  
2  
3  
4 rehabilitation centers, so our findings may not represent the perspectives of all parents of  
5 children with CZS and should not be generalized. Our study generated the views of mothers  
6 predominantly with very few fathers taking part. They may have a very different perspective.  
7  
8  
9

## 10 11 12 13 14 **CONCLUSION**

15  
16  
17  
18 This is a unique study which aims to understand the views and perception of parents  
19 with regard to the needs of their children with CZS guided by the ICF. Although the parents  
20 did concentrate on issues related to movement abilities of their children, overall their emphasis  
21 of concerns was centred around environmental factors. These factors included issues such as;  
22 the context of services, systems and policies for prevention and treatment of health problems  
23 through rehabilitation as well as factors supporting a healthy lifestyle to promote the physical  
24 and psychological well-being and social status of their children.  
25  
26  
27  
28  
29  
30  
31  
32

33  
34 Our results reinforce the importance of including the parents' perspective in the  
35 development of a COS. Parents are the ones who live and experience the main limitations and  
36 potential of their children, they highlight the urgent need for environmental changes to improve  
37 the lives of children with CZS and their families in Brazil. In the future, when children with  
38 CZS are able to express their own opinions, we should also hear their views as to what they  
39 consider relevant for outcome measures.  
40  
41  
42  
43  
44  
45  
46  
47  
48  
49  
50

51 Figure 1 – Study flowchart

52  
53 Figure 2 – Sociodemographic data of children

54  
55 Figure 3 – Sociodemographic data for parent/caregivers

56  
57  
58 Figure 4: ICF categories representing the parents' perspective  
59  
60

## REFERENCES

1. Rasmussen SA, Jamieson DJ, Honein MA, Petersen LR. Zika virus and birth defects—reviewing the evidence for causality. *New England Journal of Medicine*. 2016;374(20):1981-7.
2. Krauer F, Riesen M, Reveiz L, Oladapo OT, Martinez-Vega R, Porgo TV, et al. Zika virus infection as a cause of congenital brain abnormalities and Guillain–Barré syndrome: systematic review. *PLoS medicine*. 2017;14(1):e1002203.
3. Reyes MM, et al. Zika Virus Detection in Amniotic Fluid and Zika-Associated Birth Defects. *American Journal of Obstetrics and Gynecology*, 2020.
4. Pereira AM, et al. Zika Virus and Pregnancy: Association between Acute Infection and Microcephaly in Newborns in the State of Rio de Janeiro, Brazil. *Geburtshilfe und Frauenheilkunde*, v. 80, n. 01, p. 60-65, 2020
5. Teixeira GA, et al. Analysis of the concept of the Zika Virus congenital syndrome. *Ciencia & saude coletiva*, v. 25, n. 2, p. 567, 2020
6. Oliveira Melo AS, Malinger G, Ximenes R, Szejnfeld PO, Alves Sampaio S, Bispo de Filippis AM. Zika virus intrauterine infection causes fetal brain abnormality and microcephaly: tip of the iceberg? *Ultrasound in obstetrics & gynecology* 2016; 47: 6-7.
7. Melo AS, Aguiar RS, Amorim MM, Arruda MB, Melo FO, Ribeiro ST et al. Congenital Zika Virus Infection: Beyond Neonatal Microcephaly. *JAMA Neurol* 2016; 73: 1407-16
8. Costello A, Dua T, Duran P, Gülmezoglu M, Oladapo OT, Perea W, et al. Defining the syndrome associated with congenital Zika virus infection. *Bulletin of the World Health Organization*. 2016;94(6):406.
9. Niemeyer B, et al. What We Can Find Beyond the Classic Neuroimaging Findings of Congenital Zika Virus Syndrome?. *European Neurology*, p. 1-8, 2020.
10. MacDonald, Pia DM, and E. Wayne Holden. "Zika and public health: Understanding the epidemiology and information environment." *Pediatrics* 141.Supplement 2 (2018): S137-S145.
11. Ministério da Saúde (BR). Secretaria de Vigilância em Saúde. Vigilância em saúde no Brasil 2003|2019: da criação da Secretaria de Vigilância em Saúde aos dias atuais. *Bol Epidemiol* [Internet]. 2019 set [acesso em janeiro 2020]; 50(n.esp.):1-154. Disponível em: <http://www.saude.gov.br/boletins-epidemiologicos>.
12. Williamson P, Altman D, Blazeby J, Clarke M, Gargon E. *Driving up the quality and relevance of research through the use of agreed core outcomes*. SAGE Publications Sage UK: London, England; 2012
13. Prinsen, Cecilia AC, et al. "Core Outcome Measures in Effectiveness Trials (COMET) initiative: protocol for an international Delphi study to achieve consensus on how to select outcome measurement instruments for outcomes included in a 'core outcome set'." *Trials* 15.1 (2014): 247.
14. Schiariti V, Mâsse LC. Identifying relevant areas of functioning in children and youth with Cerebral Palsy using the ICF-CY coding system: From whose perspective? *European Journal of Paediatric Neurology*. 2014;18(5):609-17
15. Organization WH. *International classification of functioning, disability and health: ICF*: Geneva: World Health Organization; 2001
16. Schiariti V, et al. "Implementation of the International Classification of Functioning, Disability, and Health (ICF) core sets for children and youth with cerebral palsy: global initiatives promoting optimal functioning." *International journal of environmental research and public health* 15.9 (2018): 1899.

17. Pope C, Mays N. Reaching the parts other methods cannot reach: an introduction to qualitative methods in health and health services research. *BMJ* 1995;311:42–5
18. Kitzinger J. Qualitative research. Introducing focus groups. *BMJ* 1995;311:299–302
19. Silva DBR, Pfeifer LI, Funayama CAR. GMFCS-E&R: Sistema de classificação da função motora grossa-ampliado e revisito. 2010
20. Schiariti V, et al. ‘He does not see himself as being different’: the perspectives of children and caregivers on relevant areas of functioning in cerebral palsy. *Developmental Medicine & Child Neurology*, v. 56, n. 9, p. 853-861, 2014
21. Takahashi T, Okochi J; Kostanjsek N. Development of ICF Illustration library. In: Tokyo Japan: WHO-Family of International Classifications Network Meeting. 2005.
22. Glegg SM. Facilitating interviews in qualitative research with visual tools: a typology. *Qualitative health research*. 2019;29(2):301-10
23. Cieza A, et al. Refinements of the ICF Linking Rules to strengthen their potential for establishing comparability of health information. *Disability and rehabilitation*, v. 41, n. 5, p. 574-583, 2019.
24. Letts L, Wilkins S, Law M, Stewart D, Bosch J, Westmorland M. Guidelines for critical review form: Qualitative studies (Version 2.0). McMaster University
25. Longo E, de Campos AC, Schiariti V. Zika Virus After Emergency Response: Can the ICF Guide Rehabilitation of Children With Microcephaly? *Pediatric Physical Therapy*. 2019;31(4):370-2
26. Kuper, H.; Smythe, T.; Duttine, A. Reflections on Health Promotion and Disability in Low and Middle-Income Countries: Case Study of Parent-Support Programmes for Children with Congenital Zika Syndrome. *Int. J. Environ. Res. Public Health* 2018, 15, 514.
27. Smythe T, et al. Engagement of Fathers in Parent Group Interventions for Children with Congenital Zika Syndrome: A Qualitative Study. *International journal of environmental research and public health*, v. 16, n. 20, p. 3862, 2019
28. Sá MRC, et al. The need to act together in every way possible: inter-sector action in health and education for children living with the congenital Zika syndrome. *Cadernos de saude publica*, v. 35, n. 12, p. e00233718, 2019
29. Darrah J, et al. Context therapy: a new intervention approach for children with cerebral palsy. *Developmental Medicine & Child Neurology*, v. 53, n. 7, p. 615-620, 2011
30. Duarte JS, et al. Necessidades de crianças com síndrome congênita pelo Zika vírus no contexto domiciliar. *Cadernos Saúde Coletiva*, v. 27, n. 3, p. 249-256, 2019.
31. Saygi, E.K.; Giray, E.; Cersit, H.P.; Ulutatar, F.; Aydin, R. Assessment of Family Environment and Needs of Families Who Have Children with Cerebral Palsy. *Turk. J. Phys. Med. Rehabil.* 2015, 61, 320–325.
32. Adebajo T, Godfred-Cato S, Viens L, Fischer M, Staples JE, Kuhnert-Tallman W, et al. Update: interim guidance for the diagnosis, evaluation, and management of infants with possible congenital Zika virus infection—United States, October 2017
33. Broussard CS, Shapiro-Mendoza CK, Peacock G, Rasmussen SA, Mai CT, Petersen EE, et al. Public Health Approach to Addressing the Needs of Children Affected by Congenital Zika Syndrome. *Pediatrics*. 2018;141(Supplement 2):S146-S53
34. Freitas PSS, et al. How do mothers feel? Life with children with congenital Zika syndrome. *International Journal of Gynecology & Obstetrics*, v. 148, p. 20-28, 2020
35. Albuquerque MSV, et al. Access to healthcare for children with Congenital Zika Syndrome in Brazil: perspectives of mothers and health professionals. *Health policy and planning*, v. 34, n. 7, p. 499-507, 2019.
36. Duttine, A, Smythe, T, Ribiero Calheiro de Sá, M, Ferrite, S, Zuurmond, M, Moreira, M. E., ... & Kuper, H. (2020). Congenital Zika Syndrome—Assessing the Need for a

- 1  
2  
3  
4 Family Support Programme in Brazil. *International Journal of Environmental Research and Public Health*, 17(10), 3559.
- 5  
6  
7 37. Longo E, De Campos AC, Palisano RJ. Let's make pediatric physical therapy a true  
8 evidence-based field! Can we count on you?. *Brazilian journal of physical therapy*, v.  
9 23, n. 3, p. 187, 2019
- 10  
11 38. Rosenbaum P. The importance of context: what are our assumptions about childhood  
12 disability? *Developmental Medicine & Child Neurology*. 2015;57(12):1084
- 13  
14 39. Vargus-Adams JN, Martin LK. Domains of importance for parents, medical  
15 professionals and youth with cerebral palsy considering treatment outcomes. *Child: care,  
16 health and development*, v. 37, n. 2, p. 276-281, 2011
- 17  
18 40. Martin MR, Dischino M. GO BABY GO! THE FREEDOM OF  
19 MOVEMENT. *Palaestra*, v. 31, n. 3, 2017
- 20  
21 41. Imms C, Granlund M, Wilson PH, Steenbergen B, Rosenbaum PL, Gordon AM.  
22 Participation, both a means and an end: a conceptual analysis of processes and outcomes  
23 in childhood disability. *Developmental Medicine & Child Neurology*. 2017;59(1):16-25
- 24  
25 42. Dunn N, Shields N, Taylor NF, & Dodd, KJ. Comparing the self concept of children  
26 with cerebral palsy to the perceptions of their parents. *Disability and  
27 rehabilitation*, 31(5), 387-393.
- 28  
29 43. Schiariti V. MY ABILITIES FIRST: Positive language in health care. *Clin Teach*. 2020  
30 Jun;17(3):272-274.
- 31  
32 44. Porter S, & Mimm N. (2017). Infants With Congenital Zika Virus Infection. *Infants &  
33 Young Children*, 30(1), 17-27.
- 34  
35

36  
37 **Contributors:** VS, MG and EL designed the study. TNCC recruited the participants and  
38 conducted the interviews. VS, MG, EL, TNCC reviewed and refined the data. TNCC wrote the  
39 article. VS, MG, EL, AM, JST and AGM revised the article. TNCC received qualitative  
40 research training through participation in a qualitative health research methods course at the  
41 Federal University of Rio Grande do Norte/Brazil.

42  
43  
44  
45  
46  
47 **Funding:** This study was not funded

48  
49  
50  
51 **Competing interests:** None declared.

52  
53  
54  
55 **Acknowledgments:** The authors would like to thank all the participants who took part in this  
56 study: without them this study would not have been possible.

57  
58  
59  
60 **Patient consent for publication:** Not required

1  
2  
3  
4 **Data availability statement:** Data are available upon request to the corresponding author. As  
5  
6 data contain information which may lead to the identification of study participants, funding  
7  
8 would be required to support anonymisation of the data  
9

10  
11 **Ethics approval:** This research was approved by the Ethics and Research Committee of the  
12  
13 Faculty of Health Sciences of Trairi/Federal University of Rio Grande do Norte  
14  
15 (75053417.1.0000.5568), it was also re-approved at Liverpool University Ethics Committee  
16  
17 (#2083)  
18

19  
20 **Patient and public involvement:** Families were not involved in the design, recruitment or  
21  
22 conduct of the study. However, the results will be presented to families, professionals and  
23  
24 managers at each participating center, with a view to discussing strategies to meet the needs of  
25  
26 children with CZS and their families.  
27  
28  
29  
30  
31  
32  
33  
34  
35  
36  
37  
38  
39  
40  
41  
42  
43  
44  
45  
46  
47  
48  
49  
50  
51  
52  
53  
54  
55  
56  
57  
58  
59  
60



Figure 1: Study flowchart

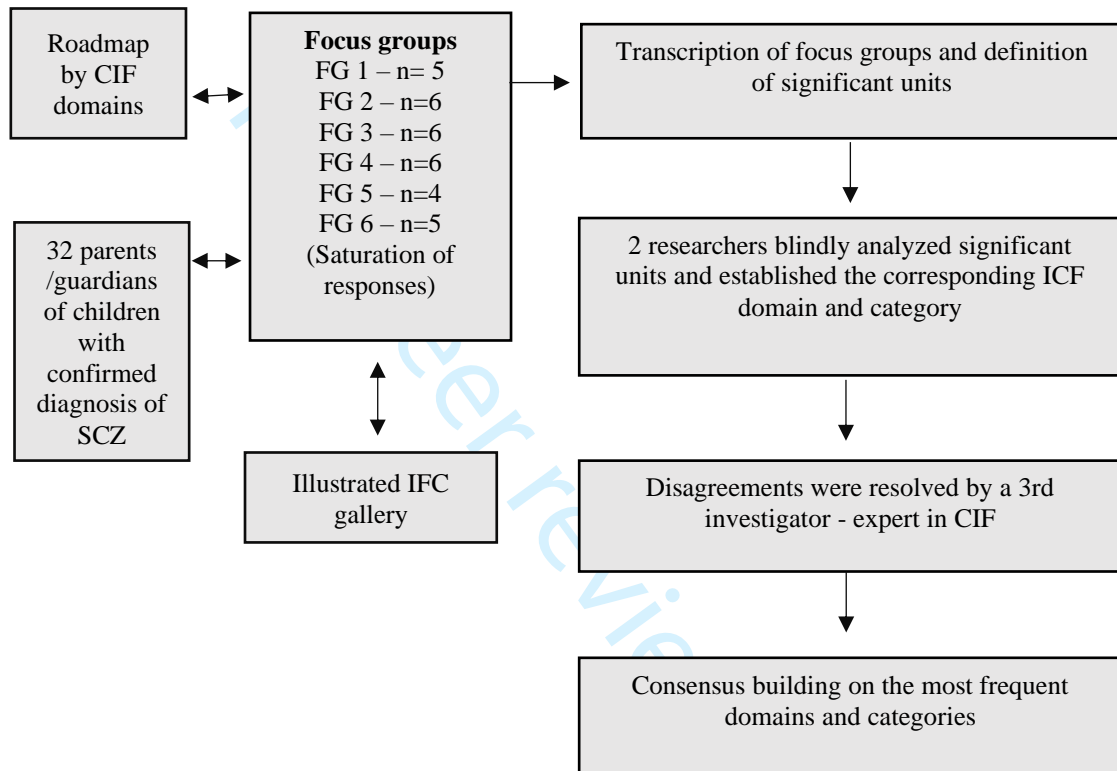

Figure 2 – Sociodemographic data of children

### Sociodemographic Data - Children Structured Interview

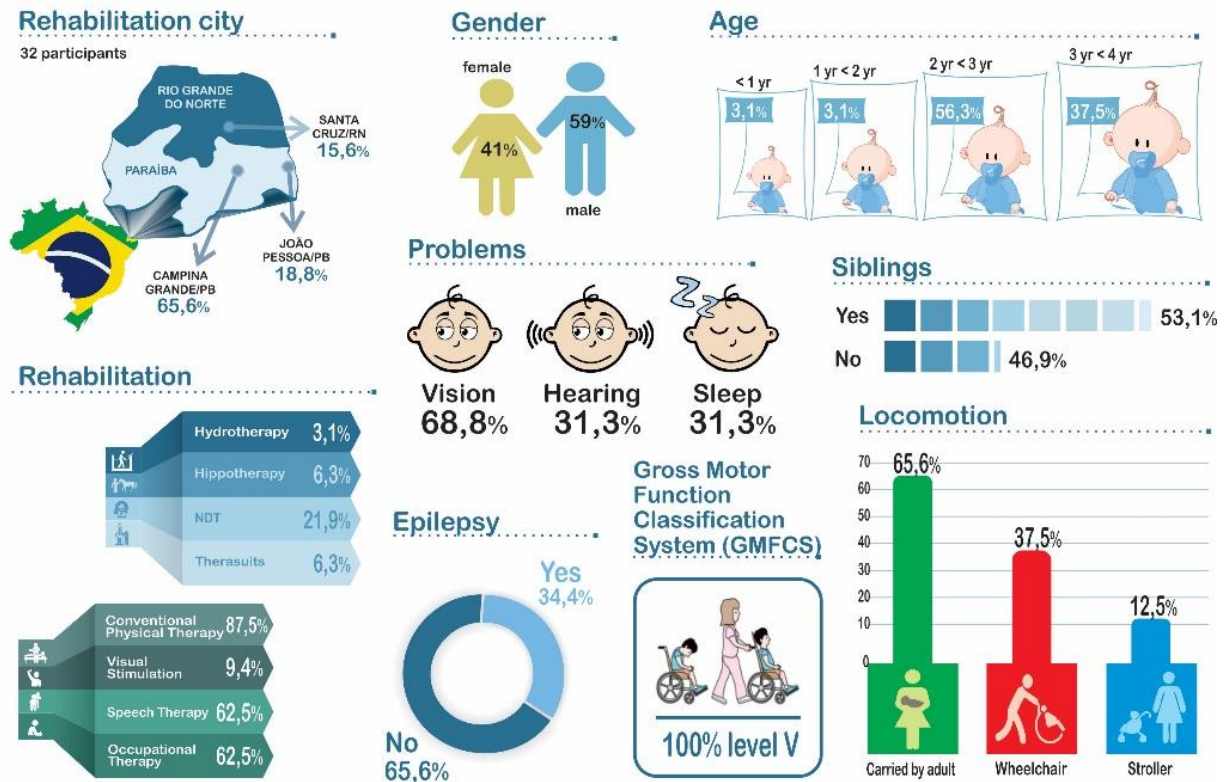

Figure 2 – Sociodemographic data of children

Figure 3 – Sociodemographic data for parent/caregivers

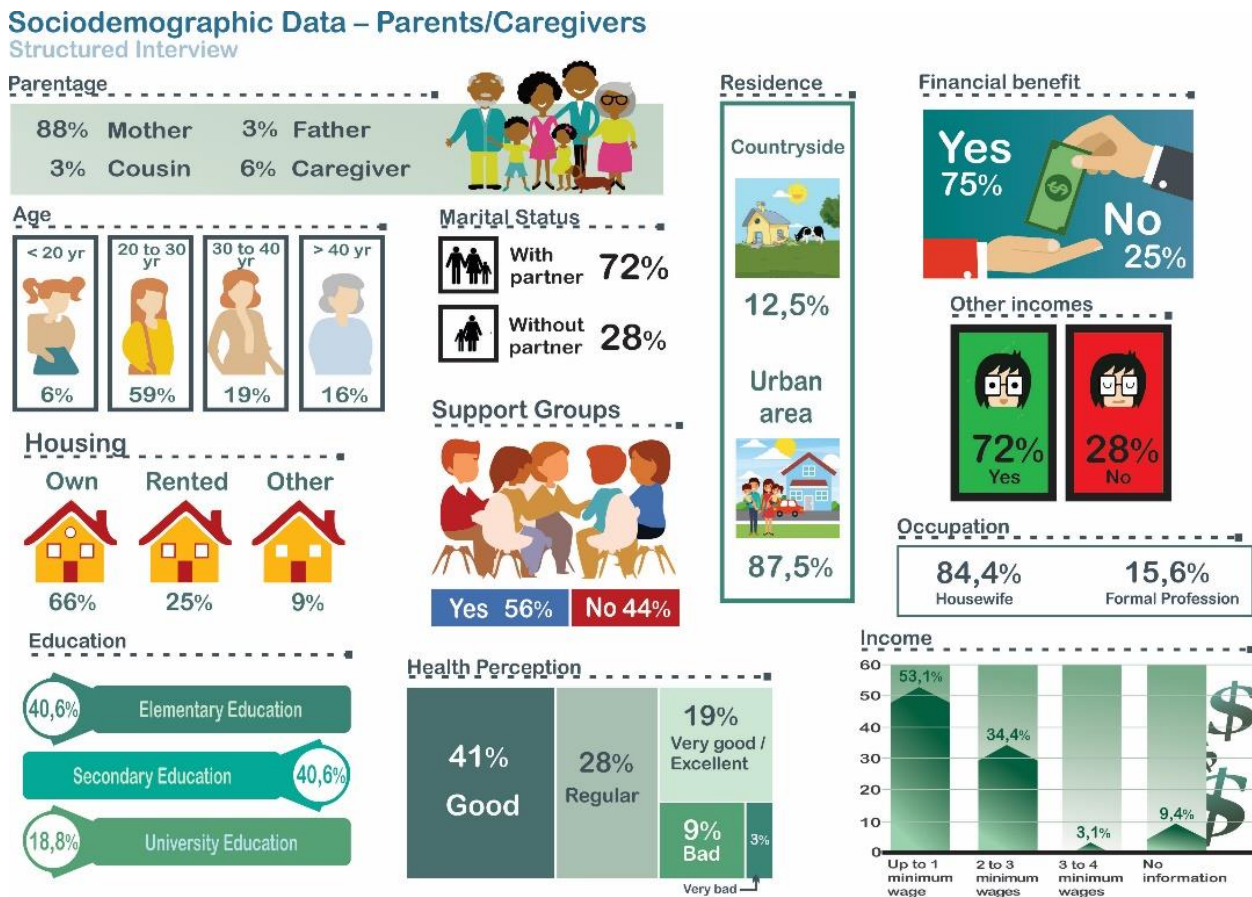

Figure 3 – Sociodemographic data for parent/caregivers

Figure 4: ICF categories representing the parents' perspective



Figure 4: ICF categories representing the parents' perspective

## Supplementary material 1

**ZIKA FOCUS GROUPS****Aims of focus groups:**

To elicit **what outcomes** are considered important to parents and caregivers of children with Zika virus and therefore what should be included in an outcome measure.

**Population:**

Parents and/or Caregivers of children who have had infants born with congenital infections or similar conditions who have children from 0-10 years and who are willing to take part in a focus group. We will attempt to sample parents of children with a range of severity of disorders and will attempt to sample from both urban and rural settings.

**Framework:**

The ICF and ICF Core Sets for children and youth with CP will be used as an overarching framework to ensure a comprehensive representation of outcomes.

**Questionnaire:**

1. If you think about your child as an individual, what **personal characteristics** are important about him/her? (Moderator provide an example) **PERSONAL FACTORS**
2. If you think about the **daily activities**, (Moderator provide an example, show pictures of activities)
  - a. What activities your child is able to do?
  - b. What activities does your child find hard/difficult to do?
3. If you think about the **physical and social environment (family, school, and neighborhood)** of your child, (Moderator provide an example, show pictures, ask HOME, SCHOOL, COMMUNITY)
  - a. What do you find **helpful or supportive** in facilitating participation in different activities?
  - b. What **challenges or barriers** does your child experience?
4. If you think about the **body** of your child, which body parts cause your child some difficulties, if any? (Moderator provide an example, may be a picture of the body and they can mark areas with an X)
5. If you think about the **body** of your child, what parts of his/her body do not work the way it supposes to, if any? (Moderator provide an example, may be a list from the ICF Core Sets then they can mark functions from the list) **BODY FUNCTIONS**
6. Tell me about the **biggest problems** for you at the moment.
7. If people were looking into treatments for your child, what are the things you might **hope to improve:**
  - a. In terms of their **daily activities**?
  - b. In terms of making it **easier for your child to participate** in daily activities (in the neighbourhood, at home with the family and at school or nursery, if they attend)?

Supplementary material 2

Visual cards with images from the ICF illustrated gallery

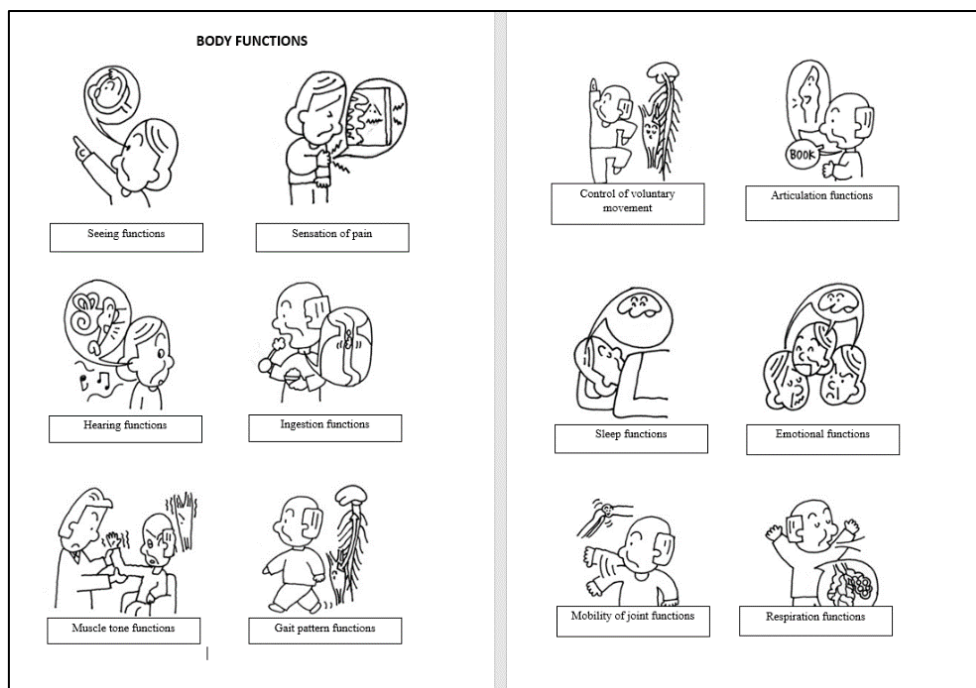

**Consolidated criteria for reporting qualitative studies (COREQ): 32-item checklist**

| <b>Domain 1: Research team and reflexivity</b> |                                          |                                                                                                                                                          |                                                                                                                                                                                                                                                                                         |
|------------------------------------------------|------------------------------------------|----------------------------------------------------------------------------------------------------------------------------------------------------------|-----------------------------------------------------------------------------------------------------------------------------------------------------------------------------------------------------------------------------------------------------------------------------------------|
| <b>Personal Characteristics</b>                |                                          |                                                                                                                                                          |                                                                                                                                                                                                                                                                                         |
| 1                                              | Interviewer/facilitator                  | Which author/s conducted the interview or focus group?                                                                                                   | The first and the last authors conducted the focus groups. <b>Pag 6</b>                                                                                                                                                                                                                 |
| 2                                              | Credentials                              | What were the researcher's credentials? E.g. PhD, MD                                                                                                     | Msc Candidate - nurse; PhD- Physical Therapist. <b>Pag 1</b>                                                                                                                                                                                                                            |
| 3                                              | Occupation                               | What was their occupation at the time of the study?                                                                                                      | Msc candidate - nurse; Professor.                                                                                                                                                                                                                                                       |
| 4                                              | Gender                                   | Was the researcher male or female?                                                                                                                       | Female.                                                                                                                                                                                                                                                                                 |
| 5                                              | Experience and training                  | What experience or training did the researcher have?                                                                                                     | She was training by the last author, who has a lot of experience conducting focus group in Brazil and Spain. She was following previous qualitative studies as a trainee before start her research.                                                                                     |
| <b>Relationship with participant</b>           |                                          |                                                                                                                                                          |                                                                                                                                                                                                                                                                                         |
| 6                                              | Relationship established                 | Was a relationship established prior to study commencement?                                                                                              | No. <b>Pag 22</b>                                                                                                                                                                                                                                                                       |
| 7                                              | Participant knowledge of the interviewer | What did the participants know about the researcher? e.g. personal goals, reasons for doing the research                                                 | Participants were informed that they would be interviewed by a nurse who was conducting research in partnership with the university of Liverpool, with the aim of developing a set of outcome measures for children with CZS. <b>Pag 5</b>                                              |
| 8                                              | Interviewer characteristics              | What characteristics were reported about the interviewer/facilitator? e.g. Bias, assumptions, reasons and interests in the research topic                | Participants were informed that they would be interviewed by a nurse who was conducting research in partnership with the university of Liverpool, with the aim of developing a set of outcome measures for children with CZS. <b>Pag 5</b>                                              |
| <b>Domain 2: study design</b>                  |                                          |                                                                                                                                                          |                                                                                                                                                                                                                                                                                         |
| <b>Theoretical framework</b>                   |                                          |                                                                                                                                                          |                                                                                                                                                                                                                                                                                         |
| 9                                              | Methodological orientation and Theory    | What methodological orientation was stated to underpin the study? e.g. grounded theory, discourse analysis, ethnography, phenomenology, content analysis | The methodological orientation used for the study was the current model of the World Health Organization (WHO), the International Classification of Functioning (ICF). The data were analyzed considering the linking rules methodology proposed by Cieza et al. (2019). <b>Pag. 07</b> |
| <b>Participant selection</b>                   |                                          |                                                                                                                                                          |                                                                                                                                                                                                                                                                                         |
| 10                                             | Sampling                                 | How were participants selected? e.g. purposive,                                                                                                          | Participants were purposively selected. <b>Pag. 05</b>                                                                                                                                                                                                                                  |

|                        |                              |                                                                                   |                                                                                                                                                                                                                                  |
|------------------------|------------------------------|-----------------------------------------------------------------------------------|----------------------------------------------------------------------------------------------------------------------------------------------------------------------------------------------------------------------------------|
|                        |                              | convenience, consecutive, snowball                                                |                                                                                                                                                                                                                                  |
| 11                     | Method of approach           | How were participants approached? e.g. face-to-face, telephone, mail, email       | Participants were invited via phone call or in person at the rehabilitation clinics. Participants were interviewed face to face, through focus groups. <b>Pag. 05</b>                                                            |
| 12                     | Sample size                  | How many participants were in the study?                                          | Six focus groups were conducted with 32 caregivers of children with severe neurodevelopmental disorders associated with CZS. <b>Pag. 06</b>                                                                                      |
| 13                     | Non-participation            | How many people refused to participate or dropped out? Reasons?                   | Of the 36 parents identified and invited to the study, 32 agreed to participate. <b>Pag. 06</b>                                                                                                                                  |
| <b>Setting</b>         |                              |                                                                                   |                                                                                                                                                                                                                                  |
| 14                     | Setting of data collection   | Where was the data collected? e.g. home, clinic, workplace                        | Data were collected at the rehabilitation clinic linked to each participant. <b>Pag. 06</b>                                                                                                                                      |
| 15                     | Presence of non-participants | Was anyone else present besides the participants and researchers?                 | In the focus groups held in Campina Grande the psychologist accompanied the interviews.                                                                                                                                          |
| 16                     | Description of sample        | What are the important characteristics of the sample? e.g. demographic data, date | Information on children are in the Figure 2 and the characteristics of the families are in the Figure 3. <b>Pag. 09</b>                                                                                                          |
| <b>Data collection</b> |                              |                                                                                   |                                                                                                                                                                                                                                  |
| 17                     | Interview guide              | Were questions, prompts, guides provided by the authors? Was it pilot tested?     | A questionnaire adapted from a previous ICF-based qualitative study was used to conduct the focus group, covering the different ICF domains. <b>Pag. 06</b>                                                                      |
| 18                     | Repeat interviews            | Were repeat interviews carried out? If yes, how many?                             | In the sixth focus group, the content started to repeat itself, when the saturation criterion was established. <b>Pag. 06</b>                                                                                                    |
| 19                     | Audio/visual recording       | Did the research use audio or visual recording to collect the data?               | All groups were recorded and later transcribed in full. <b>Pag. 07</b>                                                                                                                                                           |
| 20                     | Field notes                  | Were field notes made during and/or after the interview or focus group?           | Yes, the researcher used a field diary.                                                                                                                                                                                          |
| 21                     | Duration                     | What was the duration of the interviews or focus group?                           | The duration of the focus groups ranged from 60 to 90 minutes <b>Pag. 07</b>                                                                                                                                                     |
| 22                     | Data saturation              | Was data saturation discussed?                                                    | We continued to do focus groups until saturation was reached where the testimonies became repetitive, predictable, and were not providing any additional information. Saturation was achieved by the sixth group. <b>Pag. 06</b> |
| 23                     | Transcripts returned         | Were transcripts returned to participants for comment and/or correction?          | No                                                                                                                                                                                                                               |



| <b>Domain 3: analysis and findingsz</b> |                                |                                                                                                                                   |                                                                                                                                                                                                                                                                                                                                                                                                                                                                                                                                                                                                                                                                                               |
|-----------------------------------------|--------------------------------|-----------------------------------------------------------------------------------------------------------------------------------|-----------------------------------------------------------------------------------------------------------------------------------------------------------------------------------------------------------------------------------------------------------------------------------------------------------------------------------------------------------------------------------------------------------------------------------------------------------------------------------------------------------------------------------------------------------------------------------------------------------------------------------------------------------------------------------------------|
| <b>Data analysis</b>                    |                                |                                                                                                                                   |                                                                                                                                                                                                                                                                                                                                                                                                                                                                                                                                                                                                                                                                                               |
| 24                                      | Number of data coders          | How many data coders coded the data?                                                                                              | The transcribed content was analyzed by three researchers experienced in qualitative research (TC, EL, VS). <b>Pag. 07</b>                                                                                                                                                                                                                                                                                                                                                                                                                                                                                                                                                                    |
| 25                                      | Description of the coding tree | Did authors provide a description of the coding tree?                                                                             | They split the content into significant units with using NVIVO software, version 11.0 (QSR International, 2019), and associated them with each ICF domain and category using the WHO's linking rules (Cieza et al, 2019) as follows: TC and EL, trained in ICF, performed a blind reading of the content and established the ICF domain and category for each significant unit of the interview to which it was judged to be relevant. VS, a specialist in ICF and with extensive experience in childhood disability, analyzed the disagreements of the two researchers, establishing consensus in relation to the domain/category of the ICF regarding the significant units. <b>Pag. 07</b> |
| 26                                      | Derivation of themes           | Were themes identified in advance or derived from the data?                                                                       | The themes were identified from the study data using the ICF model. <b>Pag. 07</b>                                                                                                                                                                                                                                                                                                                                                                                                                                                                                                                                                                                                            |
| 27                                      | Software                       | What software, if applicable, was used to manage the data?                                                                        | NVIVO software, version 11.0 (QSR International, 2019). <b>Pag. 07</b>                                                                                                                                                                                                                                                                                                                                                                                                                                                                                                                                                                                                                        |
| 28                                      | Participant checking           | Did participants provide feedback on the findings?                                                                                | No.                                                                                                                                                                                                                                                                                                                                                                                                                                                                                                                                                                                                                                                                                           |
| <b>Reporting</b>                        |                                |                                                                                                                                   |                                                                                                                                                                                                                                                                                                                                                                                                                                                                                                                                                                                                                                                                                               |
| 29                                      | Quotations presented           | Were participant quotations presented to illustrate the themes / findings? Was each quotation identified? e.g. participant number | The participants' quotes were presented to illustrate the themes without identification. <b>Pag 10-14</b>                                                                                                                                                                                                                                                                                                                                                                                                                                                                                                                                                                                     |
| 30                                      | Data and findings consistent   | Was there consistency between the data presented and the findings?                                                                | Yes. <b>Pag 9-14</b>                                                                                                                                                                                                                                                                                                                                                                                                                                                                                                                                                                                                                                                                          |
| 31                                      | Clarity of major themes        | Were major themes clearly presented in the findings?                                                                              | Yes. <b>Pag 9-14</b>                                                                                                                                                                                                                                                                                                                                                                                                                                                                                                                                                                                                                                                                          |
| 32                                      | Clarity of minor themes        | Is there a description of diverse cases or discussion of minor themes?                                                            | Yes. <b>Pag 9-14</b>                                                                                                                                                                                                                                                                                                                                                                                                                                                                                                                                                                                                                                                                          |

# BMJ Open

## How Congenital Zika Virus impacted my child's functioning and disability: a Brazilian qualitative study guided by the ICF

|                                 |                                                                                                                                                                                                                                                                                                                                                                                                                                                                                                                      |
|---------------------------------|----------------------------------------------------------------------------------------------------------------------------------------------------------------------------------------------------------------------------------------------------------------------------------------------------------------------------------------------------------------------------------------------------------------------------------------------------------------------------------------------------------------------|
| Journal:                        | <i>BMJ Open</i>                                                                                                                                                                                                                                                                                                                                                                                                                                                                                                      |
| Manuscript ID                   | bmjopen-2020-038228.R2                                                                                                                                                                                                                                                                                                                                                                                                                                                                                               |
| Article Type:                   | Original research                                                                                                                                                                                                                                                                                                                                                                                                                                                                                                    |
| Date Submitted by the Author:   | 20-Oct-2020                                                                                                                                                                                                                                                                                                                                                                                                                                                                                                          |
| Complete List of Authors:       | Campos, Taynah; Universidade Federal do Rio Grande do Norte, Schiariti, Veronica; University of Victoria, Gladstone, Melissa; University of Liverpool Institute of Translational Medicine, Women and Children's Health<br>Melo, Adriana; Instituto de Pesquisa Professor Joaquim Amorim Neto<br>Tavares, Jousilene; Instituto de Pesquisa Professor Joaquim Amorim Neto<br>Magalhães, Adriana; Federal University of Rio Grande do Norte – UFRN-FACISA<br>Longo, Egmar; Universidade Federal do Rio Grande do Norte, |
| <b>Primary Subject Heading</b>: | Global health                                                                                                                                                                                                                                                                                                                                                                                                                                                                                                        |
| Secondary Subject Heading:      | Public health                                                                                                                                                                                                                                                                                                                                                                                                                                                                                                        |
| Keywords:                       | INFECTIOUS DISEASES, Public health < INFECTIOUS DISEASES, Developmental neurology & neurodisability < PAEDIATRICS                                                                                                                                                                                                                                                                                                                                                                                                    |
|                                 |                                                                                                                                                                                                                                                                                                                                                                                                                                                                                                                      |

SCHOLARONE™  
Manuscripts



I, the Submitting Author has the right to grant and does grant on behalf of all authors of the Work (as defined in the below author licence), an exclusive licence and/or a non-exclusive licence for contributions from authors who are: i) UK Crown employees; ii) where BMJ has agreed a CC-BY licence shall apply, and/or iii) in accordance with the terms applicable for US Federal Government officers or employees acting as part of their official duties; on a worldwide, perpetual, irrevocable, royalty-free basis to BMJ Publishing Group Ltd ("BMJ") its licensees and where the relevant Journal is co-owned by BMJ to the co-owners of the Journal, to publish the Work in this journal and any other BMJ products and to exploit all rights, as set out in our [licence](#).

The Submitting Author accepts and understands that any supply made under these terms is made by BMJ to the Submitting Author unless you are acting as an employee on behalf of your employer or a postgraduate student of an affiliated institution which is paying any applicable article publishing charge ("APC") for Open Access articles. Where the Submitting Author wishes to make the Work available on an Open Access basis (and intends to pay the relevant APC), the terms of reuse of such Open Access shall be governed by a Creative Commons licence – details of these licences and which [Creative Commons](#) licence will apply to this Work are set out in our licence referred to above.

Other than as permitted in any relevant BMJ Author's Self Archiving Policies, I confirm this Work has not been accepted for publication elsewhere, is not being considered for publication elsewhere and does not duplicate material already published. I confirm all authors consent to publication of this Work and authorise the granting of this licence.

1  
2  
3  
4 ***How Congenital Zika Virus impacted my child's functioning and disability: a Brazilian***  
5 ***qualitative study guided by the ICF***  
6

7  
8 Taynah Neri Correia Campos, Verónica Schiariti, Melissa Gladstone, Adriana Melo,  
9 Jousilene Sales Tavares, Adriana Gomes Magalhães & Egmar Longo

10  
11 **Correspondence to:**

12  
13 **Egmar Longo, PhD**  
14 **Graduate Program in Collective Health – Federal University of Rio Grande do Norte –**  
15 **UFRN-FACISA**  
16 **Rua Vila Trairi S/N, Centro, Santa Cruz, RN**  
17 **59200-000, Brazil, +5584 32912411**  
18 **egmarlongo@yahoo.es**  
19

20  
21 Taynah Neri Correia Campos, MsC  
22 Graduate Program in Collective Health  
23 Federal University of Rio Grande do Norte – UFRN-FACISA  
24 Rua Vila Trairi S/N, Centro, Santa Cruz, RN  
25 59200-000, Brazil  
26

27  
28 Verónica Schiariti, PhD  
29 Adjunct Associate Professor – Division of Medical Sciences  
30 University of Victoria  
31 Victoria, BC, Canada  
32

33  
34 Melissa Gladstone, PhD  
35 Professor of International Child Health and Neurodevelopmental Paediatrics  
36 Department of Women and Children's Health  
37 Institute of Translational Medicine  
38 University of Liverpool  
39 Eaton Road, Liverpool, L12 2AP, UK  
40

41  
42 Adriana Melo, PhD  
43 Instituto de Pesquisa Professor Joaquim Amorim Neto  
44 Campina Grande – Paraiba Brazil  
45

46  
47 Jousilene Sales Tavares, PhD  
48 Instituto de Pesquisa Professor Joaquim Amorim Neto  
49 Campina Grande – Paraiba Brazil  
50

51  
52 Adriana Gomes Magalhães, PhD  
53 Graduate Program in Rehabilitation Sciences – Federal University of Rio Grande do Norte –  
54 UFRN-FACISA  
55 Rua Vila Trairi S/N, Centro, Santa Cruz, RN  
56 59200-000, Brazil  
57

58 **4.383 words**

59 **Keywords:** Zika Virus Infection. Zika Virus. International Classification of Functioning,  
60 Disability and Health. Measures of Association, Exposure, Outcome, child

## Abstract

**Introduction:** The Zika Virus outbreak in Brazil has had devastating social, medical and financial consequences for families. Both researchers and clinicians are measuring longer term outcomes to understand the impact of the Zika on child development, functioning and disability. Outcomes and tools used to measure them are very varied and we are unclear how meaningful they are to families and children. This study aimed to identify the parents' perspectives on relevant areas of functioning and disability that should be included as outcome measures for children with congenital Zika Syndrome (CZS), as guided by the International Classification of Functioning, Disability and Health (ICF).

**Methods:** This qualitative study included parents or caregivers of children aged 0 to 5 years with confirmed CZS from two states in northeastern Brazil. Interviews were conducted using focus groups. Content mapping followed the WHO's ICF linking rules. Three raters analyzed the content using NVIVO 11.

**Results:** Thirty-two caregivers participated in six focus groups, 88% were mothers with an average age of 30 years. Most children were male (59%) and all were level V (severe) to on the Gross Motor Function Classification System (GMFCS). Overall, 825 themes were mapped to 36 ICF categories. Although parents mentioned areas across all ICF domains, they reported that areas of mobility, eating and recreation were most relevant for them. In addition, environmental factors were highly identified as barriers, specifically services, policies and access to assistive devices. The most predominant facilitators within the environment were; immediate family support, kind relationships with therapists and support from the extended family.

**Conclusions:** Although parents emphasized issues related to mobility, their greatest concerns involved environmental factors, such as access and quality of health and social services, systems and policies. These results reinforce the importance of including parents' perspectives when selecting or developing outcome measures for CZS.

#### Strengths and limitations of this study

- This is the first ICF-based qualitative study describing caregivers' perceptions on relevant areas of function in children with CZS in Brazil.
- Few studies have previously undertaken research to understand parent's views on the issue of what outcome measures should be considered in neurodevelopmental disorders.
- We had limited representation of men within our sample as the main caregiver was predominantly women.
- Our study was limited in terms of numbers of participants and region in Brazil, limiting the generalizability of our study.

## INTRODUCTION

The Zika virus (ZIKV) was identified in Brazil at the beginning of 2015. During this time, rates of microcephaly and other congenital brain abnormalities increased, suggesting a causal relationship between the two.<sup>1</sup> Since then, clinical reports have documented the teratogenic effect of ZIKV in pregnant women, particularly when infected in the first trimester.<sup>2,3,4</sup> The most prominent anomalies for children with congenital ZIKV is microcephaly, but other manifestations such as; spasticity, seizures, eating difficulties, irritability, ocular abnormalities, hearing loss, calcifications, cortical disorders and ventriculomegaly have been described.<sup>5, 6, 7</sup> There is still no clear definition of exactly what is included in Congenital Zika syndrome. As a result, surveillance studies are underway to identify the wider spectrum of congenital malformations which may be associated with ZIKV infection.<sup>8,9</sup>

A precise estimate of ZIKV infection incidence is difficult to determine due to variations in case ascertainment between countries and only a small number of children identified with manifestations of the more severe congenital ZIKV syndrome.<sup>10</sup> There are currently 3,406 confirmed cases of children with microcephaly and/or other neurological signs due to CZS in Brazil, with a further 2,596 cases under investigation.<sup>11</sup>

Given the severity of the syndrome, the scientific community has mobilized efforts to understand the mechanisms of this health condition and to measure long term health and neurodevelopmental outcomes of children with this condition. Presently, a large variety of heterogenous tools and outcomes are being utilized, often which causes confusion and lack of ability to conduct meta-analyses and syntheses of data. Furthermore, most tools chosen are those chosen by epidemiologists and researchers who may have little understanding of the what is most relevant to parents and families with children with this condition. Primarily, tools to

1  
2  
3  
4 measure child development are used; not always that relevant when functioning for these  
5  
6 children may be very limited. As such, creating a standardized core outcome set (COS) for CZS  
7  
8 will reduce the heterogeneity of the studies and further enable clearer synthesis and data sharing  
9  
10 between studies.<sup>12</sup>  
11  
12  
13

14 The Core Outcomes Measures in Effectiveness Trials (COMET) is an initiative aimed  
15  
16 at identifying and creating a core set of outcomes for any clinical health situation. This is often  
17  
18 conducted through a process of systematic reviews of outcomes measured, consensus work as  
19  
20 well as the involvement of families who support the development of these outcomes in order to  
21  
22 ensure that researchers consider outcomes that are most relevant and appropriate to the patient's  
23  
24 needs.<sup>13, 14</sup> As part of COS development, a framework is usually utilized to enable outcomes to  
25  
26 be classified and considered for finalization in a core outcome set. In the case of neurodisability  
27  
28 and neurodevelopmental disorders, a helpful framework can be the International Classification  
29  
30 of Functioning, Disability and Health (ICF) which provides a standard language and framework  
31  
32 for health states.<sup>14</sup> The ICF includes both functions and structure of the body and activities and  
33  
34 participation of the child and can be used as a guiding framework providing a common language  
35  
36 for describing the dynamic interaction between the person functional abilities and the role of  
37  
38 the environment.<sup>15</sup>  
39  
40  
41  
42  
43  
44

45 Currently, there is no COS for children with CZS. To fill this gap, we aim to develop a  
46  
47 COS for children with Zika and other congenital infections. This project is coordinated by the  
48  
49 University of Liverpool in partnership with the University of Victoria (Canada) and Federal  
50  
51 University of Rio Grande do Norte - UFRN-FACISA (Brazil). This paper describes a qualitative  
52  
53 study that is part of the 1<sup>st</sup> phase of the COS for CZS project.<sup>16</sup> The specific objective of this  
54  
55 qualitative study is to identify the parents' perspectives on relevant areas of functioning and  
56  
57  
58  
59  
60

1  
2  
3  
4 disability which should be included as outcome measures for children with CZS, guided by the  
5  
6 ICF.  
7  
8  
9

## 10 11 **METHODS** 12 13

14 This study used a qualitative methodology with an exploratory approach through focus  
15 groups. We chose to use a qualitative approach as it enables investigation and an in-depth  
16 understanding of the perspectives and experiences of parents/caregivers of children with CZS.  
17 Focus groups, in particular, provide the potential to explore and clarify points of view and reveal  
18 dimensions of understanding which would be less easily accessible in other data collection  
19 formats.<sup>17, 18</sup>  
20  
21  
22  
23  
24  
25  
26  
27  
28

29 This research was approved by the Ethics and Research Committee of the Faculty of  
30 Health Sciences of Trairi/Federal University of Rio Grande do Norte (2.357.552), it was also  
31 re-approved at Liverpool University Ethics Committee (#2083) and developed in three  
32 Brazilian rehabilitation centers for CZS in the states of Rio Grande do Norte (Physical Therapy  
33 School Clinic at UFRN-FACISA, in Santa Cruz) and Paraíba (Center for the Care of Children  
34 with Microcephaly at the Professor Joaquim Amorim Neto Research Institute - IPESQ, in  
35 Campina Grande, and Physical Therapy School Clinic at UNIPE, in Joao Pessoa).  
36 Parents/guardians signed a Consent Form after being provided with an information sheet which  
37 was read out to them. Parents also signed consent for voice recording and use of images.  
38  
39  
40  
41  
42  
43  
44  
45  
46  
47  
48  
49

50 Participants with important common characteristics were purposively selected by  
51 members of the research team, through active search by phone call or direct personal approach.  
52 The inclusion criteria included: 1) being parents/caregivers of children with confirmed  
53 diagnosis of CZS by polymerase chain reaction (PCR) or presumed diagnosis based on obstetric  
54 ultrasound, transfontanellar ultrasound, computed tomography (CT) and magnetic resonance  
55  
56  
57  
58  
59  
60



1  
2  
3  
4 imaging (MRI), 2) child with congenital CZS aged zero to five years , and 3) living in the area  
5 covered by the study (states of Rio Grande do Norte and Paraíba) and attending the respective  
6  
7 rehabilitation services.  
8  
9

10  
11  
12 The rehabilitation centers are public services linked to research institutions and higher  
13 education in the region. This study did not include parents whose children had congenital  
14 syndromes due to other etiologies.  
15  
16  
17

18  
19  
20 All parents responded to a sociodemographic questionnaire, applied by the researchers  
21 prior to the focus groups with information about; their relationship with the child, marital status,  
22 age, income, government benefit, education, housing and self-reported health, in addition to  
23 information from children about gender, age, mobility, rehabilitation, frequency day care  
24 centers or schools, and difficulties with vision, hearing, sleep and epilepsy. This questionnaire  
25 was to ensure good understanding prior to rolling it out to all respondents. Two research  
26 assistants were involved in the data collection. In each center, the physiotherapist who  
27 accompanied the children classified their motor abilities using the GMFCS. This is an age-  
28 specific scheme designed for children with cerebral palsy (CP) based on five levels of gross  
29 motor function, ranging from level I (most able) to level V (least able)<sup>19</sup> and provided some  
30 clear information on the severity of the children whose parents took part in the study. The study  
31 flowchart can be viewed in Figure 1. We used the consolidated criteria for notification of  
32 qualitative studies (COREQ) guidelines to guide us with our study methodology and write up.  
33  
34  
35  
36  
37  
38  
39  
40  
41  
42  
43  
44  
45  
46  
47  
48  
49

50  
51 Insert Figure 1 here  
52  
53

54 The focus groups were carried out between September/2018 and January/2019, by  
55 research assistants (TC, EL), trained both in qualitative studies and in conducting focus groups.  
56 We continued to do focus groups until saturation was reached – where testimonies became  
57  
58  
59  
60

1  
2  
3  
4 repetitive, predictable, and were not providing any additional information. Saturation was  
5  
6 achieved by the sixth group. We did not exceed six parents/caregivers per group in order to  
7  
8 enable effective participation of the participants and appropriate discussion of themes. Of the  
9  
10 36 parents identified and invited to the study, 32 agreed to participate.  
11  
12  
13

14 A questionnaire adapted from a previous ICF-based qualitative study was used to  
15  
16 conduct the focus group, covering the different ICF domains (Supplementary material 1).<sup>20</sup>  
17  
18 Visual tags were produced with images from the ICF illustrated gallery (Supplementary  
19  
20 material 2)<sup>21</sup> to assist in understanding the concepts, as studies indicate that visualization has  
21  
22 the potential to support data production during the qualitative interview process.<sup>22</sup> The duration  
23  
24 of the focus groups ranged from 60 to 90 minutes. The participants were given a therapeutic  
25  
26 toy developed by research team at the end of the groups, called “fun fishing”, in order to thank  
27  
28 the parents for participating in the study. They were encouraged by the professional team to use  
29  
30 it as a therapeutic toy for stimulation of their children at home and to promote fun. All groups  
31  
32 were recorded and later transcribed in full. Names of participants and any identifying  
33  
34 characteristics were excluded from the transcripts. The transcribed content was analyzed by  
35  
36 three researchers experienced in qualitative research (TC, EL, VS). They split the content into  
37  
38 significant units with using NVIVO software, version 11.0 (QSR International, 2019), and  
39  
40 associated them with each ICF domain and category using the WHO’s linking rules<sup>23</sup> as  
41  
42 follows: TC and EL, trained in ICF, performed a blind reading of the content and established  
43  
44 the ICF domain and category for each significant unit of the interview to which it was judged  
45  
46 to be relevant. VS, a specialist in ICF and with extensive experience in childhood disability,  
47  
48 analyzed the disagreements of the two researchers, establishing consensus in relation to the  
49  
50 domain/category of the ICF regarding the significant units.  
51  
52  
53  
54  
55  
56  
57  
58  
59  
60

1  
2  
3  
4 Next, the content was analyzed by the researchers who interpreted the data through an  
5 inductive and deductive analysis process based on a permanent dialogue throughout the process  
6 to ensure consistency and reliability of the interpretations. Any verbatim which did not exceed  
7 “five mentions” was discarded as it was felt not to be representative enough of the data. The  
8 frequency of each ICF category in the statements of parents/caregivers was used as a parameter  
9 to determine the order of importance of ICF domains/categories. After this process, the content  
10 was translated from Brazilian Portuguese into English by a bilingual member of the research  
11 team and the content checked by two others, to ensure that there was no loss of meaning.  
12  
13  
14  
15  
16  
17  
18  
19  
20  
21  
22

23 Aspects of credibility, transferability, reliability and confirmability were considered  
24 during all stages in order to guarantee the quality of the qualitative research.<sup>24</sup> Credibility was  
25 ensured by thoroughly conducting six focus groups until saturation was reached, with  
26 subsequent blind analysis, review and triangulation, and then consensus being reached after  
27 meetings and debates regarding the interpretation of results. The researchers have robust  
28 training in the area of childhood disabilities and in the use of the ICF for neurodisabilities.  
29 Transferability occurred through observation of the rigor to which the research group stopped  
30 to describe how the data was obtained through the focus groups, the selection and description  
31 of the sample, which in this case involved the participants. Reliability was guaranteed by  
32 detailing the data collection processes, presenting the multiple steps followed by the  
33 researchers, and showing how the pair analysis and data interpretation took place. A measure  
34 of reliability through using the kappa statistic was also used to verify the agreement between  
35 the judges, with results indicating almost perfect agreement (0.916) considering 95%  
36 confidence intervals. Finally, verification was achieved through a peer discussion of the data at  
37 each stage of the analysis by the research team.  
38  
39  
40  
41  
42  
43  
44  
45  
46  
47  
48  
49  
50  
51  
52  
53  
54  
55  
56  
57

58 **Patient and public involvement:** Families were not involved in the design, recruitment or  
59 conduct of the study. However, the results will be presented to families, professionals and  
60

1  
2  
3  
4 managers at each participating center, with a view to discussing strategies to meet the needs of  
5  
6 children with CZS and their families.  
7  
8

## 9 10 **RESULTS**

11  
12  
13 Six focus groups were conducted with 32 caregivers of children with severe  
14 neurodevelopmental disorders associated with CZS. Information related to children can be  
15 found in Figure 2 and the characteristics of families are in Figure 3. The average age of the  
16 children was 32.5 (SD = 6.2) months, with a predominance of males, all with severe motor  
17 impairment on the GMFCS. Although none of the children walked, only 37.5% of them had a  
18 wheelchair.  
19  
20  
21  
22  
23  
24  
25  
26  
27  
28  
29  
30

31 Insert Figure 2 here  
32

33  
34 Insert Figure 3 here  
35  
36  
37  
38  
39

40 Thirty-six categories of the ICF were identified, as demonstrated in Figure 4 (personal  
41 factors were expressed only minimally). This figure represents the parents' perspectives on  
42 relevant areas of functioning and disability of their children.  
43  
44  
45  
46  
47  
48  
49

50 Insert Figure 4 here  
51  
52  
53  
54

55 The parents mentioned relevant areas that covered all ICF domains, but a greater  
56 diversity of categories was observed in the domains of activities and participation and body  
57  
58  
59  
60

functions. However, the environmental factors domain led the ranking of 12 categories, as can be seen in Table 1.

Insert Table 1 here

| CATEGORY                                                                                    | QTY | DOMAIN                       |
|---------------------------------------------------------------------------------------------|-----|------------------------------|
| 1° e580 Health services, systems and policies                                               | 59  | Environmental Factors        |
| 2° b760 Control of voluntary movement functions                                             | 37  | Body Functions               |
| 3° e115 Products and technology for personal use in daily living                            | 33  | Environmental Factors        |
| 4° d415 Maintaining a body position                                                         | 33  | Activities and Participation |
| 5° e110 Products or substances for personal consumption                                     | 31  | Environmental Factors        |
| 6° b230 Hearing functions                                                                   | 31  | Body Functions               |
| 7° b134 Sleep functions                                                                     | 31  | Body Functions               |
| 8° d450 Walking                                                                             | 28  | Activities and Participation |
| 9° e120 Products and technology for personal indoor and outdoor mobility and transportation | 25  | Environmental Factors        |
| 10° b210 Seeing functions                                                                   | 24  | Body Functions               |
| 11° d445 Hand and arm use                                                                   | 23  | Activities and Participation |
| 12° s750 Structure of lower extremity                                                       | 22  | Body Structures              |

Table 1: Table demonstrating the ranking of the 12 most frequent categories of the ICF mentioned by parents

Table 2 shows the distribution of categories related to the environmental factors domain in detail.

Insert Table 2 here

| Environmental Factors                                                                    |    |       |
|------------------------------------------------------------------------------------------|----|-------|
| e580 Health services, systems and policies                                               | 59 | 33,0% |
| e115 Products and technology for personal use in daily living                            | 33 | 18,4% |
| e110 Products or substances for personal consumption                                     | 31 | 17,3% |
| e120 Products and technology for personal indoor and outdoor mobility and transportation | 25 | 14,0% |

|                                                       |       |            |
|-------------------------------------------------------|-------|------------|
| e310 Immediate Family                                 | 16    | 8,9%       |
| e540 Transportation services, systems and policies    | 9     | 5,0%       |
| e410 Individual attitudes of immediate family members | 6     | 3,4%       |
|                                                       | TOTAL | 179 100,0% |

Table 2: Table of areas of the ICF considered important for parents within the area of Environmental factors

Among the categories, **Health services, systems and policies** (e580) was the barrier most expressed by parents, receiving 59 mentions. This category includes the prevention and treatment of health problems, the provision of rehabilitation services and the promotion of a healthy lifestyle. The following verbatim demonstrates a mother's desire to have access to rehabilitation services in her own city.

*“Also that in Alagoas state has been the same possibilities that here in Campina, to don't need to move from one place to other, it's so complicated spend 3 months here, searching treatment that there it should have. I don't know they can't leave this treatment there, to every states have, for us don't need to move a lot to do a treatment. For them could at least sit, maintain their trunk, catch and walk.”* Mother 20.

Other barriers reported in this area included; lack of information or professionals specialized in the management of CZS and the difficulty in transport to travel to rehabilitation services in other larger cities. Examples of this are evidenced in the statements below.

*“I guess that it would help a lot if the access is facilitated, in our city, if I had physiotherapy in my city, sure I would go more often.”* Mother 03.

*“I would like that science produces medicines for this disease, because it is a new disease. Another thing, a great difficulty for me, is the absence of answers.... you go to see a doctor with your child, and the doctor is stalling, he never tells you the reality....”* Mother 24.

*“If our city would have treatment.... moving is tiring. And if when we come, we were taken care of.... We suffer from these experiences, some days I have spent many hours travelling....”* Mother 04.

1  
2  
3  
4 Some parents pointed to assistive products and technologies as facilitators. They  
5  
6 described how adapted or specially designed equipment improved the functioning of their  
7  
8 children and contributed to greater participation;  
9

10  
11  
12 *“For E\*, to facilitate activities, first I put her glasses on... once I take*  
13 *her glasses off, her vision becomes worse.... if I put the glasses on, she*  
14 *becomes much more animated.”* Mother 06.  
15  
16

17  
18 The support of the nuclear family was expressed by participants of all focus groups as  
19  
20 a major facilitator to their environment, as described below.  
21  
22

23 *“What helps? I have a lot of support from my husband and my sister. I*  
24 *live close to my sister... my parents don't live in the same city as me,*  
25 *but they always are present.... Always... from the beginning they have*  
26 *been present. My family helps me a lot, and this helps me, when I want*  
27 *to go out and can't take her with me... I leave her with my sister. The*  
28 *family support, it's the main factor that helps me, because alone, it's*  
29 *hard.”* Mother 14.  
30  
31

32  
33  
34  
35 Table 3 presents the categories referring to the activities and participation domain.  
36  
37

38 Insert Table 3 here  
39  
40  
41  
42  
43

---

44 **Activities and Participation**

|                                      |    |       |
|--------------------------------------|----|-------|
| 45 d415 Maintaining a body position  | 33 | 14,5% |
| 46 d450 Walking                      | 28 | 12,3% |
| 47 d445 Hand and arm use             | 23 | 10,1% |
| 48 d550 Eating                       | 21 | 9,3%  |
| 49 d920 Recreation and leisure       | 19 | 8,4%  |
| 50 d430 Lifting and carrying objects | 15 | 6,6%  |
| 51 d110 Watching                     | 15 | 6,6%  |
| 52 d330 Speaking                     | 12 | 5,3%  |
| 53 d760 Family relationships         | 11 | 4,8%  |
| 54 d160 Focusing attention           | 11 | 4,8%  |

|                                       |       |            |
|---------------------------------------|-------|------------|
| d410 Changing basic body position     | 9     | 4,0%       |
| d455 Moving around                    | 9     | 4,0%       |
| d710 Basic interpersonal interactions | 8     | 3,5%       |
| d730 Relating with strangers          | 7     | 3,1%       |
| d440 Fine hand use                    | 6     | 2,6%       |
|                                       | TOTAL | 227 100,0% |

Table 3: Table demonstrating areas of the ICF within activity and participation found as important to parents

As shown in Table 3, the most often expressed categories were those related to movement of children, such as **Maintaining a body position - d415**, **Walking - d450**, and **Hand and arm use - d445**. Such aspects were pointed out by the parents as being responsible for limiting activity and restricting participation in daily activities, as evidenced in the statements below.

*“M\* has difficulty maintaining body position, when I put him in standing position supported by the wall, he can stay a long time. Sitting.. he also doesn’t sit alone, but if you put him in sitting.. he stays there...He doesn’t go from lying down position to sitting, but from sitting to lying, he can.”* Mother 15.

*“Eating... she holds it but doesn’t know how put it in her mouth.”* Mother 01.

*“His major difficulties are to grasp things. He doesn’t grasp and we need to put in his hands and then he holds it. If he needs to pick up something, he can not do it, but he holds and object if I open his hand for him”* Mother 08.

*“I guess it’s so difficult for these children; they don’t walk and don’t sit yet. If, when I arrive in a place and it has a wheelchair I try and sit him in it, he still can not sit in it.”* Mother 17.

Finally, the areas of Body Function and Structure identified most by parents is shown in Table 4.

Insert Table 4 here



| <b>Body Functions</b>  |                                         |     |        |
|------------------------|-----------------------------------------|-----|--------|
| b760                   | Control of voluntary movement functions | 37  | 16,70% |
| b230                   | Hearing functions                       | 31  | 14,00% |
| b210                   | Seeing functions                        | 24  | 10,80% |
| b510                   | Ingestion functions                     | 19  | 8,60%  |
| b134                   | Sleep functions                         | 31  | 14,00% |
| b710                   | Mobility of joint functions             | 18  | 8,10%  |
| b280                   | Sensation of pain                       | 16  | 7,20%  |
| b735                   | Muscle tone functions                   | 15  | 6,80%  |
| b320                   | Articulation functions                  | 10  | 4,50%  |
| b152                   | Emotional functions                     | 8   | 3,60%  |
| b440                   | Respiration functions                   | 7   | 3,20%  |
| b770                   | Gait pattern functions                  | 6   | 2,70%  |
| TOTAL                  |                                         | 222 | 100%   |
| <b>Body Structures</b> |                                         |     |        |
| s750                   | Structure of lower extremity            | 22  | 78,60% |
| s730                   | Structure of upper extremity            | 6   | 21,40% |
| TOTAL                  |                                         | 28  | 100%   |

Table 4: Table demonstrating the categories of d Body Functions and Structures (within the ICF) identified as important by parents

**Control of voluntary movement - b760** was the most common category mentioned in the domain of functioning. Many parents expressed concerns about their child's voluntary movements (both simple and more complex) as well as their child's difficulties with coordination as well as use of their upper and lower limbs.

*“Control of movements... L\* has a lot of difficulties, she can't lift her arm or her hand. With regards to her ability to move, she also has difficulties, she can't lift her arm and hand. She doesn't have a lot problems with her legs, but she can't move her body.”* Mother 24.

Parents also pointed out problems related to; **Hearing functions - b230**, **Seeing functions - b210** and **Sleep functions - b134**.

1  
2  
3  
4  
5  
6  
7  
8  
9  
10  
11  
12  
13  
14  
15  
16  
17  
18  
19  
20  
21  
22  
23  
24  
25  
26  
27  
28  
29  
30  
31  
32  
33  
34  
35  
36  
37  
38  
39  
40  
41  
42  
43  
44  
45  
46  
47  
48  
49  
50  
51  
52  
53  
54  
55  
56  
57  
58  
59  
60

*“Her hearing is only good on one side, on the other side, it doesn’t work. We are doing a raffle to earn money to buy a device, because when she was examined it showed that she can hear with her left ear, but on the right, she doesn’t hear anything.”* Mother 22.

*“About his vision, he doesn’t see everything, his vision is low, he has difficulties.”* Father 01.

*“He has sleep difficulties, but when he falls on sleep, he sleeps the whole night.”* Mother 28.

With regards to “body structure”, the category relating to **Structure of lower extremities- s750** most commonly emerged within our parent focus groups. Many parents described issues with foot positioning and how this prevented walking and standing.

*“The knees, it is something that I guess she won’t do. And her feet, to walk, that will be a great difficulty, because she has a dislocation. We don’t know if she will walk or if she will need a wheelchair for the rest of her life.”* Mother 27.

*“About S\*’s little foot... when I put him in standing position, his foot turns to the side.”* Mother 10.

## DISCUSSION

This pioneering research is the first to describe the perceptions of parents and caregivers regarding their understanding of the issues for their children with congenital CZS as placed within the ICF framework. Parents/caregivers highlighted the importance of environmental factors and motor function for their children with CZS. These factors must therefore, be taken into account when constructing a recommended core set of outcomes to be measured in CZS. The use of the ICF as our guide for this study has enabled us to provide a holistic framework for considering perspectives that extend beyond the issues with body functions and structures for children with CZS.

1  
2  
3  
4  
5  
6  
7  
8  
9  
10  
11  
12  
13  
14  
15  
16  
17  
18  
19  
20  
21  
22  
23  
24  
25  
26  
27  
28  
29  
30  
31  
32  
33  
34  
35  
36  
37  
38  
39  
40  
41  
42  
43  
44  
45  
46  
47  
48  
49  
50  
51  
52  
53  
54  
55  
56  
57  
58  
59  
60

Despite the number of new cases of CZS stabilizing, the complex clinical presentation of CZS and its effect on children's health means that both standardized and individualized care is needed.<sup>25</sup> Researchers need to consider a holistic approach to their measurement of outcomes when following these children. The diversity of needs of these children (and families) with CZS and neurodevelopmental disabilities is wide.<sup>26</sup>

Several ICF categories were identified by parents as very relevant and which must be considered and advocated for within the global context for the creation of a COS for CZS. This is particularly the case for researchers who will be measuring the effect of rehabilitation and support interventions for families.<sup>27</sup> In particular, the importance that parents place on environmental factors for the wellbeing of their children demonstrates the real need to include this environmental context as an aspect to be assessed in the follow-up of children with CZS.<sup>28,29</sup>

Our study has demonstrated that the lack of trained professionals to support families is a major issue for parents that needs to be addressed.<sup>30</sup> Furthermore, parents expressed a great need for information about the condition of their children.<sup>31</sup> The Centers for Disease Control and Prevention (CDC) has produced a pocket guide summarizing pediatric guidelines on initial assessment and outpatient treatment for CZS.<sup>32</sup> Resources such as this could be more often provided for parents, particularly if given in a caring and sensitive manner with space for parents to reflect and ask questions. It is clear that a carefully planned public health approach which targets the needs of parents and families and provides adequate care and support for children and families, is still lacking.<sup>33, 34</sup> Addressing the environmental issues which hinder many parents and families' every day functioning is the most crucial aspect of this, and the one that will make the most difference for families and children quality of life.

Many parents/caregivers in our study expressed a desire to receive treatment and support in a single place or city. Moving from place to place for services and different types of

1  
2  
3  
4 rehabilitation all the time, is a real barrier for families. Parents in our study signalled a definite  
5 need for reorganizing health services in a way which would provide more of a “one stop”  
6  
7 approach for supporting them. This has been highlighted in other studies.<sup>35</sup> Furthermore, lack  
8  
9 of access to services (mainly due to distance, cost and lack of availability) was a massive issue  
10  
11 for families of children with CZS.<sup>36</sup> From our study, it is clear that services for support and  
12  
13 rehabilitation in a single location would minimize problems of low attendance and/or avoidance  
14  
15 of services. Lack of attendance interferes hugely with enabling good outcomes when using  
16  
17 focused, context-based and evidence-based rehabilitation.<sup>37</sup>

18  
19  
20  
21  
22  
23  
24 Parents who took part in our study voiced particular concerns around aspects of their  
25  
26 children’s movement. This permeated the domains of activities and participation, functions and  
27  
28 body structure and was, of course, expressed as a limiting factor in their participation in daily  
29  
30 and leisure activities. It was clear that parents were disappointed and desperate for a change in  
31  
32 mobility of their children and had had little counselling about adaptations to support children  
33  
34 in their daily lives through other means. The focus still seems to be on the perspective of  
35  
36 “fixing” the disability through therapies.<sup>38</sup>

37  
38  
39  
40  
41 Alongside this, parents voiced their desires relating to gait acquisition (walking) in the  
42  
43 context of their comparison of their children with typical children. This is well documented in  
44  
45 previous research with children with CP.<sup>39</sup> We know that many parents who have children who  
46  
47 will never walk often still resist early introduction of mobility aids (such as adapted toy cars or  
48  
49 wheelchairs). This is despite the fact that studies involving children with CP with severe motor  
50  
51 impairment demonstrate very positive results when using these adaptations in terms of  
52  
53 autonomy, self-esteem, social skills and participation.<sup>40</sup> Recent studies have shown that  
54  
55 promoting participation in children with physical disabilities can, in itself, result in improved  
56  
57 body function and structure.<sup>41</sup>

1  
2  
3  
4 Our findings also showed that parents concentrate on the child's impairments and that  
5  
6 parents have high expectations for healing or a cure. Unfortunately, in Brazil, there is little  
7  
8 acceptance of disabled children for what they are within their context. This negative view of  
9  
10 disability is common for parents with children with similar conditions.<sup>42</sup> Parents in Brazil tend  
11  
12 to focus on their children's ability to perform daily activities as well as the environmental  
13  
14 barriers at home, school and in the community. This demonstrates a need for action, including  
15  
16 education, at a local and national level to change attitudes towards disability. One example  
17  
18 which could be advocated is the use of accessible and open access educational tools such as  
19  
20 MY ABILITIES FIRST.<sup>43</sup>  
21  
22  
23  
24  
25

26 Our research has demonstrated what areas of the ICF parents of children with congenital  
27  
28 infections such as CZS consider important. This information is vital to have when attempting  
29  
30 to establish a COS for CZS. We also know that it is essential to also consider the child's own  
31  
32 perspective as to what he/she considers to be relevant in outcome measures, however, children  
33  
34 with CZS have limited communication and in our case, were not yet old enough to express their  
35  
36 opinions.  
37  
38  
39  
40

41 We acknowledge that parents' perceptions of the needs of their children with CZS will  
42  
43 change throughout their lives with further studies being necessary to understand this over time.  
44  
45 Professionals will need to remain vigilant as scientific knowledge about the impact of CZS will  
46  
47 evolve in the coming years.<sup>44</sup> However, due to the similarity with CP, many professionals  
48  
49 working with these children in the early years are focusing on ways to provide devices to aid  
50  
51 with functioning, stimulate child development, prevent worsening of health conditions and to  
52  
53 support caregivers. Over time the focus will shift to supporting inclusion, independent living,  
54  
55 and to continuing to maintain health and function.<sup>36</sup>  
56  
57  
58  
59  
60

1  
2  
3  
4 There were a number of limitations in our study which must be taken into account. The  
5  
6 sample was extracted from three Brazilian cities, from public or not-for profit rehabilitation  
7  
8 centers. In this way, our findings may not represent the perspectives of all parents of children  
9  
10 with CZS and should not be generalized. Our study generated the views of mothers  
11  
12 predominantly with very few fathers taking part. Fathers may have a very different perspective  
13  
14 and may have provided very different results to our study. Finally, within this study we were  
15  
16 unable to take the views of the children themselves into account. This would be important and  
17  
18 relevant to consider in the future.  
19  
20  
21  
22  
23  
24  
25

## 26 **CONCLUSION**

27  
28  
29 This is a unique study which aims to understand the views and perception of parents  
30  
31 with regard to the needs of their children with CZS guided by the ICF. Although the parents  
32  
33 did concentrate on issues related to movement abilities of their children, overall their emphasis  
34  
35 was centred around environmental factors. These factors included services, systems and  
36  
37 policies for prevention and treatment of their children as well as factors which would enable a  
38  
39 healthy lifestyle to promote the physical and psychological well-being and social status of their  
40  
41 children.  
42  
43  
44

45 Our results reinforce the importance of including the parents' perspective in the  
46  
47 development of a COS. Parents are the ones who live and experience the main limitations and  
48  
49 potential of their children and in our study, they highlight the urgent need for environmental  
50  
51 changes to improve the lives of children with CZS and their families in Brazil. In the future,  
52  
53 when children with CZS are able to express their own opinions, we should also hear their views  
54  
55 as to what they consider relevant for outcome measures.  
56  
57  
58  
59  
60

1  
2  
3  
4 Figure 1 – Study flowchart  
5

6 Figure 2 – Sociodemographic data of children  
7

8 Figure 3 – Sociodemographic data for parent/caregivers  
9

10 Figure 4: ICF categories representing the parents' perspective  
11  
12  
13  
14  
15  
16

17 **Contributors:** VS, MG and EL designed the study. TNCC recruited the participants and  
18 conducted the interviews. VS, MG, EL, TNCC reviewed and refined the data. TNCC wrote the  
19 article. VS, MG, EL, AM, JST and AGM revised the article. TNCC received qualitative  
20 research training through participation in a qualitative health research methods course at the  
21 Federal University of Rio Grande do Norte/Brazil.  
22  
23  
24  
25  
26  
27

28 **Funding:** This study was not funded  
29

30 **Competing interests:** None declared.  
31  
32

33 **Acknowledgments:** The authors would like to thank all the participants who took part in this  
34 study: without them this study would not have been possible.  
35  
36

37 **Patient consent for publication:** Not required  
38  
39

40 **Data availability statement:** Data are available upon reasonable request. Data are available  
41 upon reasonable request from the corresponding author subject to restrictions to preserve  
42 anonymity and personal privacy. These data are not publicly available as they contain  
43 information that could compromise research participant privacy/consent.  
44  
45  
46  
47  
48

49 **Ethics approval:** This research was approved by the Ethics and Research Committee of the  
50 Faculty of Health Sciences of Trairi/Federal University of Rio Grande do Norte  
51 (75053417.1.0000.5568), it was also re-approved at Liverpool University Ethics Committee  
52 (#2083)  
53  
54  
55  
56  
57

58 **Patient and public involvement:** Families were not involved in the design, recruitment or  
59 conduct of the study. However, the results will be presented to families, professionals and  
60

managers at each participating center, with a view to discussing strategies to meet the needs of children with CZS and their families.

## REFERENCES

1. Rasmussen SA, Jamieson DJ, Honein MA, Petersen LR. Zika virus and birth defects—reviewing the evidence for causality. *New England Journal of Medicine*. 2016;374(20):1981-7.
2. Krauer F, Riesen M, Reveiz L, Oladapo OT, Martinez-Vega R, Porgo TV, et al. Zika virus infection as a cause of congenital brain abnormalities and Guillain–Barré syndrome: systematic review. *PLoS medicine*. 2017;14(1):e1002203.
3. Reyes MM, et al. Zika Virus Detection in Amniotic Fluid and Zika-Associated Birth Defects. *American Journal of Obstetrics and Gynecology*, 2020.
4. Pereira AM, et al. Zika Virus and Pregnancy: Association between Acute Infection and Microcephaly in Newborns in the State of Rio de Janeiro, Brazil. *Geburtshilfe und Frauenheilkunde*, v. 80, n. 01, p. 60-65, 2020
5. Teixeira GA, et al. Analysis of the concept of the Zika Virus congenital syndrome. *Ciencia & saude coletiva*, v. 25, n. 2, p. 567, 2020
6. Oliveira Melo AS, Malinger G, Ximenes R, Szejnfeld PO, Alves Sampaio S, Bispo de Filippis AM. Zika virus intrauterine infection causes fetal brain abnormality and microcephaly: tip of the iceberg? *Ultrasound in obstetrics & gynecology* 2016; 47: 6-7.
7. Melo AS, Aguiar RS, Amorim MM, Arruda MB, Melo FO, Ribeiro ST et al. Congenital Zika Virus Infection: Beyond Neonatal Microcephaly. *JAMA Neurol* 2016; 73: 1407-16
8. Costello A, Dua T, Duran P, Gülmezoglu M, Oladapo OT, Perea W, et al. Defining the syndrome associated with congenital Zika virus infection. *Bulletin of the World Health Organization*. 2016;94(6):406.
9. Niemeyer B, et al. What We Can Find Beyond the Classic Neuroimaging Findings of Congenital Zika Virus Syndrome?. *European Neurology*, p. 1-8, 2020.
10. MacDonald, Pia DM, and E. Wayne Holden. "Zika and public health: Understanding the epidemiology and information environment." *Pediatrics* 141.Supplement 2 (2018): S137-S145.
11. Ministério da Saúde (BR). Secretaria de Vigilância em Saúde. Vigilância em saúde no Brasil 2003|2019: da criação da Secretaria de Vigilância em Saúde aos dias atuais. *Bol Epidemiol* [Internet]. 2019 set [acesso em janeiro 2020]; 50(n.esp.):1-154. Disponível em: <http://www.saude.gov.br/boletins-epidemiologicos>.
12. Williamson P, Altman D, Blazeby J, Clarke M, Gargon E. *Driving up the quality and relevance of research through the use of agreed core outcomes*. SAGE Publications Sage UK: London, England; 2012
13. Prinsen, Cecilia AC, et al. "Core Outcome Measures in Effectiveness Trials (COMET) initiative: protocol for an international Delphi study to achieve consensus on how to select outcome measurement instruments for outcomes included in a 'core outcome set'." *Trials* 15.1 (2014): 247.



14. Schiariti V, Mâsse LC. Identifying relevant areas of functioning in children and youth with Cerebral Palsy using the ICF-CY coding system: From whose perspective? *European Journal of Paediatric Neurology*. 2014;18(5):609-17
15. Organization WH. International classification of functioning, disability and health: ICF: Geneva: World Health Organization; 2001
16. Schiariti V, et al. "Implementation of the International Classification of Functioning, Disability, and Health (ICF) core sets for children and youth with cerebral palsy: global initiatives promoting optimal functioning." *International journal of environmental research and public health* 15.9 (2018): 1899.
17. Pope C, Mays N. Reaching the parts other methods cannot reach: an introduction to qualitative methods in health and health services research. *BMJ* 1995;311:42–5
18. Kitinger J. Qualitative research. Introducing focus groups. *BMJ* 1995;311:299–302
19. Silva DBR, Pfeifer LI, Funayama CAR. GMFCS-E&R: Sistema de classificação da função motora grossa-ampliado e revisito. 2010
20. Schiariti V, et al. 'He does not see himself as being different': the perspectives of children and caregivers on relevant areas of functioning in cerebral palsy. *Developmental Medicine & Child Neurology*, v. 56, n. 9, p. 853-861, 2014
21. Takahashi T, Okochi J; Kostanjsek N. Development of ICF Illustration library. In: Tokyo Japan: WHO-Family of International Classifications Network Meeting. 2005.
22. Glegg SM. Facilitating interviews in qualitative research with visual tools: a typology. *Qualitative health research*. 2019;29(2):301-10
23. Cieza A, et al. Refinements of the ICF Linking Rules to strengthen their potential for establishing comparability of health information. *Disability and rehabilitation*, v. 41, n. 5, p. 574-583, 2019.
24. Letts L, Wilkins S, Law M, Stewart D, Bosch J, Westmorland M. Guidelines for critical review form: Qualitative studies (Version 2.0). McMaster University
25. Longo E, de Campos AC, Schiariti V. Zika Virus After Emergency Response: Can the ICF Guide Rehabilitation of Children With Microcephaly? *Pediatric Physical Therapy*. 2019;31(4):370-2
26. Kuper, H.; Smythe, T.; Duttine, A. Reflections on Health Promotion and Disability in Low and Middle-Income Countries: Case Study of Parent-Support Programmes for Children with Congenital Zika Syndrome. *Int. J. Environ. Res. Public Health* 2018, 15, 514.
27. Smythe T, et al. Engagement of Fathers in Parent Group Interventions for Children with Congenital Zika Syndrome: A Qualitative Study. *International journal of environmental research and public health*, v. 16, n. 20, p. 3862, 2019
28. Sá MRC, et al. The need to act together in every way possible: inter-sector action in health and education for children living with the congenital Zika syndrome. *Cadernos de saude publica*, v. 35, n. 12, p. e00233718, 2019
29. Darrah J, et al. Context therapy: a new intervention approach for children with cerebral palsy. *Developmental Medicine & Child Neurology*, v. 53, n. 7, p. 615-620, 2011
30. Duarte JS, et al. Necessidades de crianças com síndrome congênita pelo Zika vírus no contexto domiciliar. *Cadernos Saúde Coletiva*, v. 27, n. 3, p. 249-256, 2019.
31. Saygi, E.K.; Giray, E.; Cersit, H.P.; Ulutatar, F.; Aydin, R. Assessment of Family Environment and Needs of Families Who Have Children with Cerebral Palsy. *Turk. J. Phys. Med. Rehabil.* 2015, 61, 320–325.
32. Adebajo T, Godfred-Cato S, Viens L, Fischer M, Staples JE, Kuhnert-Tallman W, et al. Update: interim guidance for the diagnosis, evaluation, and management of infants with possible congenital Zika virus infection—United States, October 2017

- 1
  - 2
  - 3
  - 4
  - 5
  - 6
  - 7
  - 8
  - 9
  - 10
  - 11
  - 12
  - 13
  - 14
  - 15
  - 16
  - 17
  - 18
  - 19
  - 20
  - 21
  - 22
  - 23
  - 24
  - 25
  - 26
  - 27
  - 28
  - 29
  - 30
  - 31
  - 32
  - 33
  - 34
  - 35
  - 36
  - 37
  - 38
  - 39
  - 40
  - 41
  - 42
  - 43
  - 44
  - 45
  - 46
  - 47
  - 48
  - 49
  - 50
  - 51
  - 52
  - 53
  - 54
  - 55
  - 56
  - 57
  - 58
  - 59
  - 60
33. Broussard CS, Shapiro-Mendoza CK, Peacock G, Rasmussen SA, Mai CT, Petersen EE, et al. Public Health Approach to Addressing the Needs of Children Affected by Congenital Zika Syndrome. *Pediatrics*. 2018;141(Supplement 2):S146-S53
34. Freitas PSS, et al. How do mothers feel? Life with children with congenital Zika syndrome. *International Journal of Gynecology & Obstetrics*, v. 148, p. 20-28, 2020
35. Albuquerque MSV, et al. Access to healthcare for children with Congenital Zika Syndrome in Brazil: perspectives of mothers and health professionals. *Health policy and planning*, v. 34, n. 7, p. 499-507, 2019.
36. Duttine, A, Smythe, T, Ribiero Calheiro de Sá, M, Ferrite, S, Zuurmond, M, Moreira, M. E., ... & Kuper, H. (2020). Congenital Zika Syndrome—Assessing the Need for a Family Support Programme in Brazil. *International Journal of Environmental Research and Public Health*, 17(10), 3559.
37. Longo E, De Campos AC, Palisano RJ. Let's make pediatric physical therapy a true evidence-based field! Can we count on you?. *Brazilian journal of physical therapy*, v. 23, n. 3, p. 187, 2019
38. Rosenbaum P. The importance of context: what are our assumptions about childhood disability? *Developmental Medicine & Child Neurology*. 2015;57(12):1084
39. Vargus-Adams JN, Martin LK. Domains of importance for parents, medical professionals and youth with cerebral palsy considering treatment outcomes. *Child: care, health and development*, v. 37, n. 2, p. 276-281, 2011
40. Martin MR, Dischino M. GO BABY GO! THE FREEDOM OF MOVEMENT. *Palaestra*, v. 31, n. 3, 2017
41. Imms C, Granlund M, Wilson PH, Steenbergen B, Rosenbaum PL, Gordon AM. Participation, both a means and an end: a conceptual analysis of processes and outcomes in childhood disability. *Developmental Medicine & Child Neurology*. 2017;59(1):16-25
42. Dunn N, Shields N, Taylor NF, & Dodd, KJ. Comparing the self concept of children with cerebral palsy to the perceptions of their parents. *Disability and rehabilitation*, 31(5), 387-393.
43. Schiariti V. MY ABILITIES FIRST: Positive language in health care. *Clin Teach*. 2020 Jun;17(3):272-274.
44. Porter S, & Mimm N. (2017). Infants With Congenital Zika Virus Infection. *Infants & Young Children*, 30(1), 17-27.

Figure 1: Study flowchart



Figure 2 – Sociodemographic data of children

### Sociodemographic Data - Children

#### Structured Interview

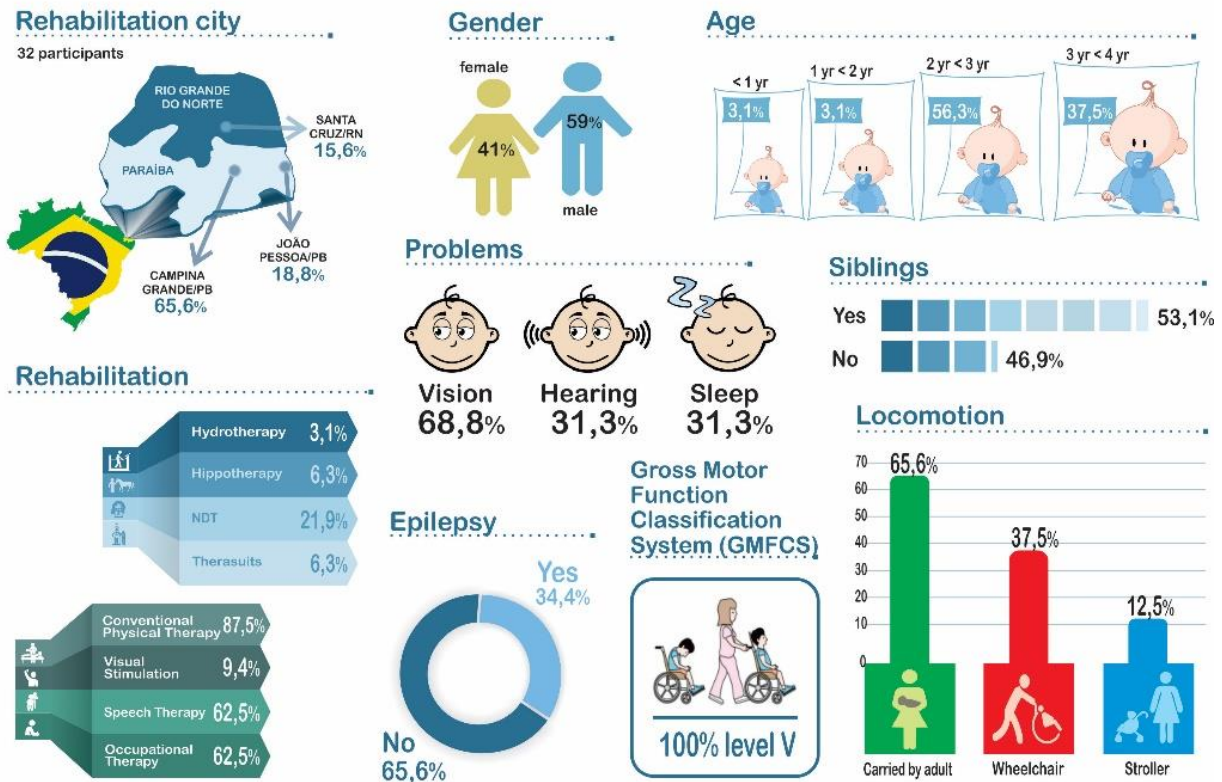

Figure 2 – Sociodemographic data of children

Figure 3 – Sociodemographic data for parent/caregivers

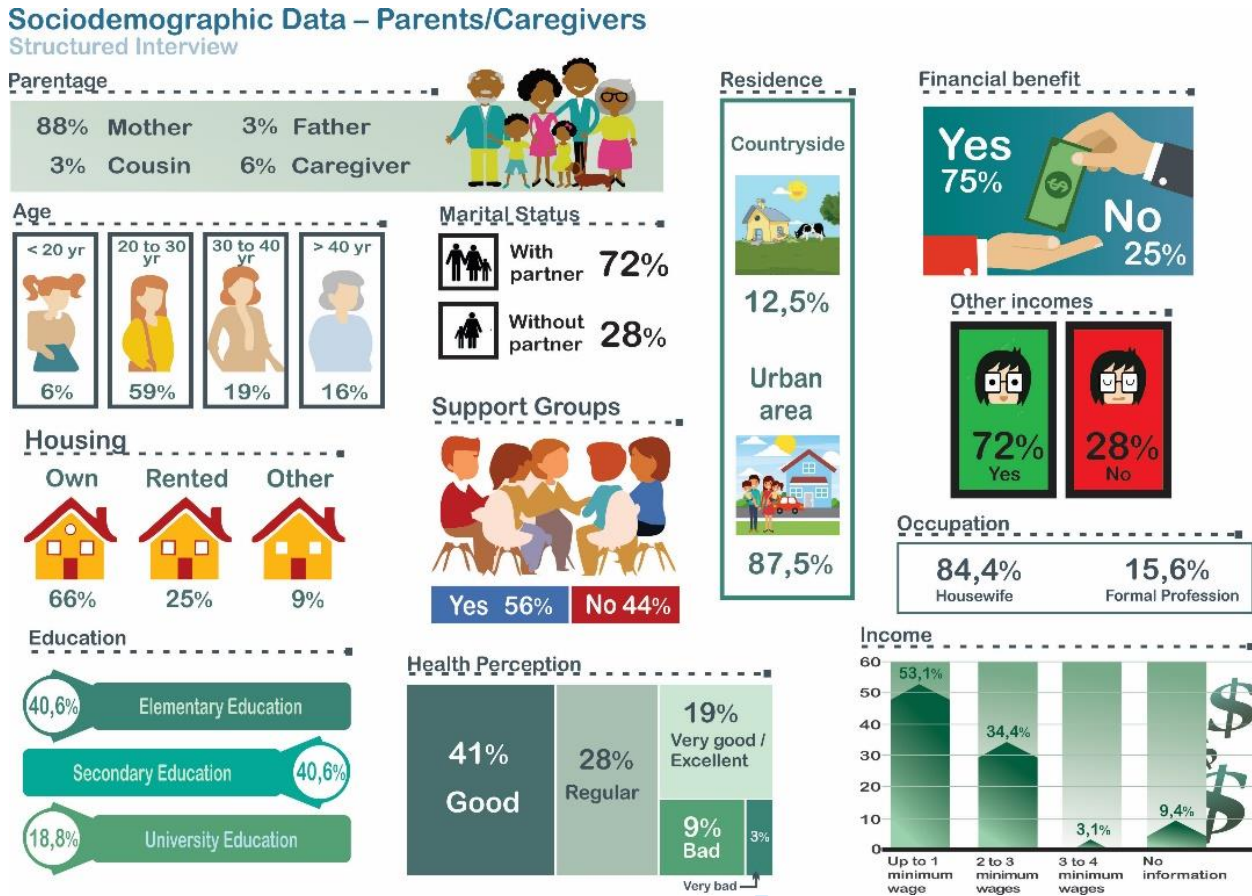

Figure 3 – Sociodemographic data for parent/caregivers

Figure 4: ICF categories representing the parents' perspective

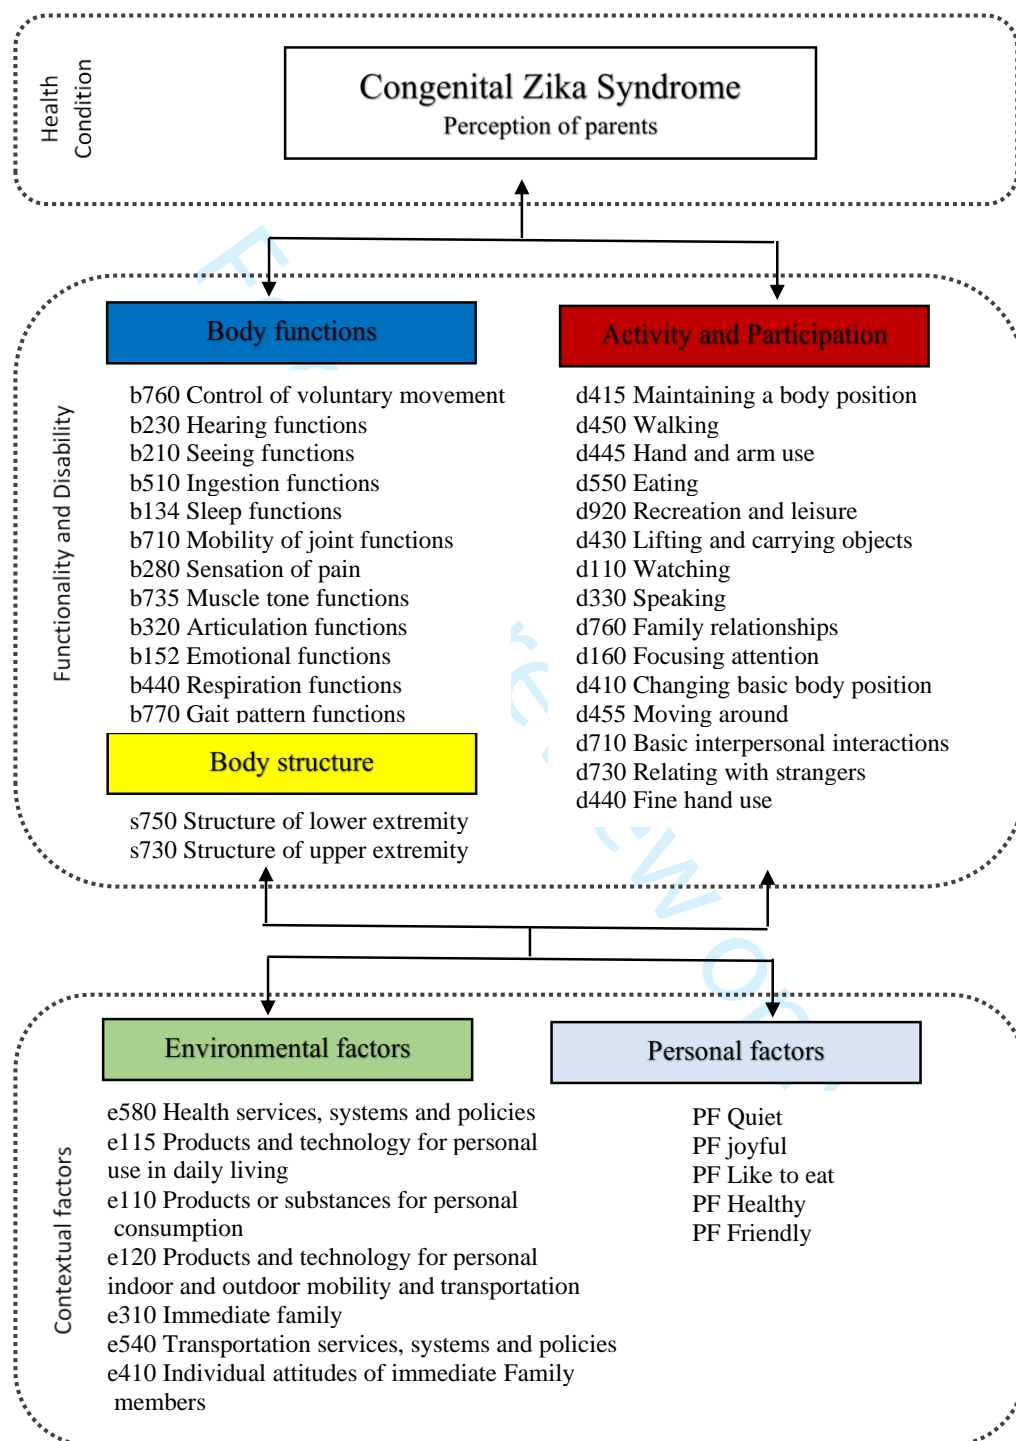

Figure 4: ICF categories representing the parents' perspective

## Supplementary material 1

**ZIKA FOCUS GROUPS****Aims of focus groups:**

To elicit **what outcomes** are considered important to parents and caregivers of children with Zika virus and therefore what should be included in an outcome measure.

**Population:**

Parents and/or Caregivers of children who have had infants born with congenital infections or similar conditions who have children from 0-10 years and who are willing to take part in a focus group. We will attempt to sample parents of children with a range of severity of disorders and will attempt to sample from both urban and rural settings.

**Framework:**

The ICF and ICF Core Sets for children and youth with CP will be used as an overarching framework to ensure a comprehensive representation of outcomes.

**Questionnaire:**

1. If you think about your child as an individual, what **personal characteristics** are important about him/her? (Moderator provide an example) **PERSONAL FACTORS**
2. If you think about the **daily activities**, (Moderator provide an example, show pictures of activities)
  - a. What activities your child is able to do?
  - b. What activities does your child find hard/difficult to do?
3. If you think about the **physical and social environment (family, school, and neighborhood)** of your child, (Moderator provide an example, show pictures, ask HOME, SCHOOL, COMMUNITY)
  - a. What do you find **helpful or supportive** in facilitating participation in different activities?
  - b. What **challenges or barriers** does your child experience?
4. If you think about the **body** of your child, which body parts cause your child some difficulties, if any? (Moderator provide an example, may be a picture of the body and they can mark areas with an X)
5. If you think about the **body** of your child, what parts of his/her body do not work the way it supposes to, if any? (Moderator provide an example, may be a list from the ICF Core Sets then they can mark functions from the list) **BODY FUNCTIONS**
6. Tell me about the **biggest problems** for you at the moment.
7. If people were looking into treatments for your child, what are the things you might **hope to improve:**
  - a. In terms of their **daily activities**?
  - b. In terms of making it **easier for your child to participate** in daily activities (in the neighbourhood, at home with the family and at school or nursery, if they attend)?

Supplementary material 2

Visual cards with images from the ICF illustrated gallery

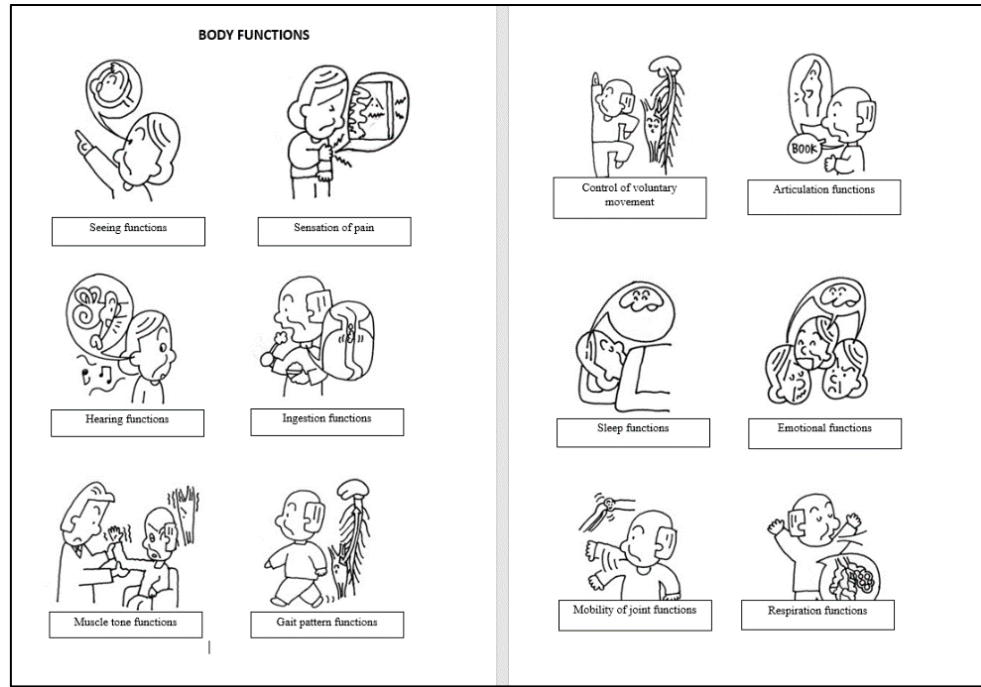



**Consolidated criteria for reporting qualitative studies (COREQ): 32-item checklist**

| <b>Domain 1: Research team and reflexivity</b> |                                          |                                                                                                                                                          |                                                                                                                                                                                                                                                                                         |
|------------------------------------------------|------------------------------------------|----------------------------------------------------------------------------------------------------------------------------------------------------------|-----------------------------------------------------------------------------------------------------------------------------------------------------------------------------------------------------------------------------------------------------------------------------------------|
| <b>Personal Characteristics</b>                |                                          |                                                                                                                                                          |                                                                                                                                                                                                                                                                                         |
| 1                                              | Interviewer/facilitator                  | Which author/s conducted the interview or focus group?                                                                                                   | The first and the last authors conducted the focus groups. <b>Pag 6</b>                                                                                                                                                                                                                 |
| 2                                              | Credentials                              | What were the researcher's credentials? E.g. PhD, MD                                                                                                     | Msc Candidate - nurse; PhD- Physical Therapist. <b>Pag 1</b>                                                                                                                                                                                                                            |
| 3                                              | Occupation                               | What was their occupation at the time of the study?                                                                                                      | Msc candidate - nurse; Professor.                                                                                                                                                                                                                                                       |
| 4                                              | Gender                                   | Was the researcher male or female?                                                                                                                       | Female.                                                                                                                                                                                                                                                                                 |
| 5                                              | Experience and training                  | What experience or training did the researcher have?                                                                                                     | She was training by the last author, who has a lot of experience conducting focus group in Brazil and Spain. She was following previous qualitative studies as a trainee before start her research.                                                                                     |
| <b>Relationship with participant</b>           |                                          |                                                                                                                                                          |                                                                                                                                                                                                                                                                                         |
| 6                                              | Relationship established                 | Was a relationship established prior to study commencement?                                                                                              | No. <b>Pag 22</b>                                                                                                                                                                                                                                                                       |
| 7                                              | Participant knowledge of the interviewer | What did the participants know about the researcher? e.g. personal goals, reasons for doing the research                                                 | Participants were informed that they would be interviewed by a nurse who was conducting research in partnership with the university of Liverpool, with the aim of developing a set of outcome measures for children with CZS. <b>Pag 5</b>                                              |
| 8                                              | Interviewer characteristics              | What characteristics were reported about the interviewer/facilitator? e.g. Bias, assumptions, reasons and interests in the research topic                | Participants were informed that they would be interviewed by a nurse who was conducting research in partnership with the university of Liverpool, with the aim of developing a set of outcome measures for children with CZS. <b>Pag 5</b>                                              |
| <b>Domain 2: study design</b>                  |                                          |                                                                                                                                                          |                                                                                                                                                                                                                                                                                         |
| <b>Theoretical framework</b>                   |                                          |                                                                                                                                                          |                                                                                                                                                                                                                                                                                         |
| 9                                              | Methodological orientation and Theory    | What methodological orientation was stated to underpin the study? e.g. grounded theory, discourse analysis, ethnography, phenomenology, content analysis | The methodological orientation used for the study was the current model of the World Health Organization (WHO), the International Classification of Functioning (ICF). The data were analyzed considering the linking rules methodology proposed by Cieza et al. (2019). <b>Pag. 07</b> |
| <b>Participant selection</b>                   |                                          |                                                                                                                                                          |                                                                                                                                                                                                                                                                                         |
| 10                                             | Sampling                                 | How were participants selected? e.g. purposive,                                                                                                          | Participants were purposively selected. <b>Pag. 05</b>                                                                                                                                                                                                                                  |

|                        |                              |                                                                                   |                                                                                                                                                                                                                                  |
|------------------------|------------------------------|-----------------------------------------------------------------------------------|----------------------------------------------------------------------------------------------------------------------------------------------------------------------------------------------------------------------------------|
|                        |                              | convenience, consecutive, snowball                                                |                                                                                                                                                                                                                                  |
| 11                     | Method of approach           | How were participants approached? e.g. face-to-face, telephone, mail, email       | Participants were invited via phone call or in person at the rehabilitation clinics. Participants were interviewed face to face, through focus groups. <b>Pag. 05</b>                                                            |
| 12                     | Sample size                  | How many participants were in the study?                                          | Six focus groups were conducted with 32 caregivers of children with severe neurodevelopmental disorders associated with CZS. <b>Pag. 06</b>                                                                                      |
| 13                     | Non-participation            | How many people refused to participate or dropped out? Reasons?                   | Of the 36 parents identified and invited to the study, 32 agreed to participate. <b>Pag. 06</b>                                                                                                                                  |
| <b>Setting</b>         |                              |                                                                                   |                                                                                                                                                                                                                                  |
| 14                     | Setting of data collection   | Where was the data collected? e.g. home, clinic, workplace                        | Data were collected at the rehabilitation clinic linked to each participant. <b>Pag. 06</b>                                                                                                                                      |
| 15                     | Presence of non-participants | Was anyone else present besides the participants and researchers?                 | In the focus groups held in Campina Grande the psychologist accompanied the interviews.                                                                                                                                          |
| 16                     | Description of sample        | What are the important characteristics of the sample? e.g. demographic data, date | Information on children are in the Figure 2 and the characteristics of the families are in the Figure 3. <b>Pag. 09</b>                                                                                                          |
| <b>Data collection</b> |                              |                                                                                   |                                                                                                                                                                                                                                  |
| 17                     | Interview guide              | Were questions, prompts, guides provided by the authors? Was it pilot tested?     | A questionnaire adapted from a previous ICF-based qualitative study was used to conduct the focus group, covering the different ICF domains. <b>Pag. 06</b>                                                                      |
| 18                     | Repeat interviews            | Were repeat interviews carried out? If yes, how many?                             | In the sixth focus group, the content started to repeat itself, when the saturation criterion was established. <b>Pag. 06</b>                                                                                                    |
| 19                     | Audio/visual recording       | Did the research use audio or visual recording to collect the data?               | All groups were recorded and later transcribed in full. <b>Pag. 07</b>                                                                                                                                                           |
| 20                     | Field notes                  | Were field notes made during and/or after the interview or focus group?           | Yes, the researcher used a field diary.                                                                                                                                                                                          |
| 21                     | Duration                     | What was the duration of the interviews or focus group?                           | The duration of the focus groups ranged from 60 to 90 minutes <b>Pag. 07</b>                                                                                                                                                     |
| 22                     | Data saturation              | Was data saturation discussed?                                                    | We continued to do focus groups until saturation was reached where the testimonies became repetitive, predictable, and were not providing any additional information. Saturation was achieved by the sixth group. <b>Pag. 06</b> |
| 23                     | Transcripts returned         | Were transcripts returned to participants for comment and/or correction?          | No                                                                                                                                                                                                                               |

| <b>Domain 3: analysis and findingsz</b> |                                |                                                                                                                                   |                                                                                                                                                                                                                                                                                                                                                                                                                                                                                                                                                                                                                                                                                               |
|-----------------------------------------|--------------------------------|-----------------------------------------------------------------------------------------------------------------------------------|-----------------------------------------------------------------------------------------------------------------------------------------------------------------------------------------------------------------------------------------------------------------------------------------------------------------------------------------------------------------------------------------------------------------------------------------------------------------------------------------------------------------------------------------------------------------------------------------------------------------------------------------------------------------------------------------------|
| <b>Data analysis</b>                    |                                |                                                                                                                                   |                                                                                                                                                                                                                                                                                                                                                                                                                                                                                                                                                                                                                                                                                               |
| 24                                      | Number of data coders          | How many data coders coded the data?                                                                                              | The transcribed content was analyzed by three researchers experienced in qualitative research (TC, EL, VS). <b>Pag. 07</b>                                                                                                                                                                                                                                                                                                                                                                                                                                                                                                                                                                    |
| 25                                      | Description of the coding tree | Did authors provide a description of the coding tree?                                                                             | They split the content into significant units with using NVIVO software, version 11.0 (QSR International, 2019), and associated them with each ICF domain and category using the WHO's linking rules (Cieza et al, 2019) as follows: TC and EL, trained in ICF, performed a blind reading of the content and established the ICF domain and category for each significant unit of the interview to which it was judged to be relevant. VS, a specialist in ICF and with extensive experience in childhood disability, analyzed the disagreements of the two researchers, establishing consensus in relation to the domain/category of the ICF regarding the significant units. <b>Pag. 07</b> |
| 26                                      | Derivation of themes           | Were themes identified in advance or derived from the data?                                                                       | The themes were identified from the study data using the ICF model. <b>Pag. 07</b>                                                                                                                                                                                                                                                                                                                                                                                                                                                                                                                                                                                                            |
| 27                                      | Software                       | What software, if applicable, was used to manage the data?                                                                        | NVIVO software, version 11.0 (QSR International, 2019). <b>Pag. 07</b>                                                                                                                                                                                                                                                                                                                                                                                                                                                                                                                                                                                                                        |
| 28                                      | Participant checking           | Did participants provide feedback on the findings?                                                                                | No.                                                                                                                                                                                                                                                                                                                                                                                                                                                                                                                                                                                                                                                                                           |
| <b>Reporting</b>                        |                                |                                                                                                                                   |                                                                                                                                                                                                                                                                                                                                                                                                                                                                                                                                                                                                                                                                                               |
| 29                                      | Quotations presented           | Were participant quotations presented to illustrate the themes / findings? Was each quotation identified? e.g. participant number | The participants' quotes were presented to illustrate the themes without identification. <b>Pag 10-14</b>                                                                                                                                                                                                                                                                                                                                                                                                                                                                                                                                                                                     |
| 30                                      | Data and findings consistent   | Was there consistency between the data presented and the findings?                                                                | Yes. <b>Pag 9-14</b>                                                                                                                                                                                                                                                                                                                                                                                                                                                                                                                                                                                                                                                                          |
| 31                                      | Clarity of major themes        | Were major themes clearly presented in the findings?                                                                              | Yes. <b>Pag 9-14</b>                                                                                                                                                                                                                                                                                                                                                                                                                                                                                                                                                                                                                                                                          |
| 32                                      | Clarity of minor themes        | Is there a description of diverse cases or discussion of minor themes?                                                            | Yes. <b>Pag 9-14</b>                                                                                                                                                                                                                                                                                                                                                                                                                                                                                                                                                                                                                                                                          |
