# Supplementary material for: How congenital Zika virus impacted my child’s functioning and disability: a Brazilian qualitative study guided by the ICF
Source: PubMed Central journal article supplement — BMJ Open. 2020 Dec 2;10(12):e038228. doi: 10.1136/bmjopen-2020-038228 (PMC7713226; doi:10.1136/bmjopen-2020-038228), 2020-12-02
Supplement: bmjopen-2020-038228supp001.pdf [file bmjopen-2020-038228supp001.pdf]

## Supplementary material 1

**ZIKA FOCUS GROUPS****Aims of focus groups:**

To elicit **what outcomes** are considered important to parents and caregivers of children with Zika virus and therefore what should be included in an outcome measure.

**Population:**

Parents and/or Caregivers of children who have had infants born with congenital infections or similar conditions who have children from 0-10 years and who are willing to take part in a focus group. We will attempt to sample parents of children with a range of severity of disorders and will attempt to sample from both urban and rural settings.

**Framework:**

The ICF and ICF Core Sets for children and youth with CP will be used as an overarching framework to ensure a comprehensive representation of outcomes.

**Questionnaire:**

1. If you think about your child as an individual, what **personal characteristics** are important about him/her? (Moderator provide an example) **PERSONAL FACTORS**
2. If you think about the **daily activities**, (Moderator provide an example, show pictures of activities)
  - a. What activities your child is able to do?
  - b. What activities does your child find hard/difficult to do?
3. If you think about the **physical and social environment (family, school, and neighborhood)** of your child, (Moderator provide an example, show pictures, ask HOME, SCHOOL, COMMUNITY)
  - a. What do you find **helpful or supportive** in facilitating participation in different activities?
  - b. What **challenges or barriers** does your child experience?
4. If you think about the **body** of your child, which body parts cause your child some difficulties, if any? (Moderator provide an example, may be a picture of the body and they can mark areas with an X)
5. If you think about the **body** of your child, what parts of his/her body do not work the way it supposes to, if any? (Moderator provide an example, may be a list from the ICF Core Sets then they can mark functions from the list) **BODY FUNCTIONS**
6. Tell me about the **biggest problems** for you at the moment.
7. If people were looking into treatments for your child, what are the things you might **hope to improve:**
  - a. In terms of their **daily activities**?
  - b. In terms of making it **easier for your child to participate** in daily activities (in the neighbourhood, at home with the family and at school or nursery, if they attend)?
