# Supplementary figures and images for: How congenital Zika virus impacted my child’s functioning and disability: a Brazilian qualitative study guided by the ICF
Source: PubMed Central journal article supplement — BMJ Open. 2020 Dec 2;10(12):e038228. doi: 10.1136/bmjopen-2020-038228 (PMC7713226; doi:10.1136/bmjopen-2020-038228), 2020-12-02

## Supplementary material 2

## Visual cards with images from the ICF illustrated gallery

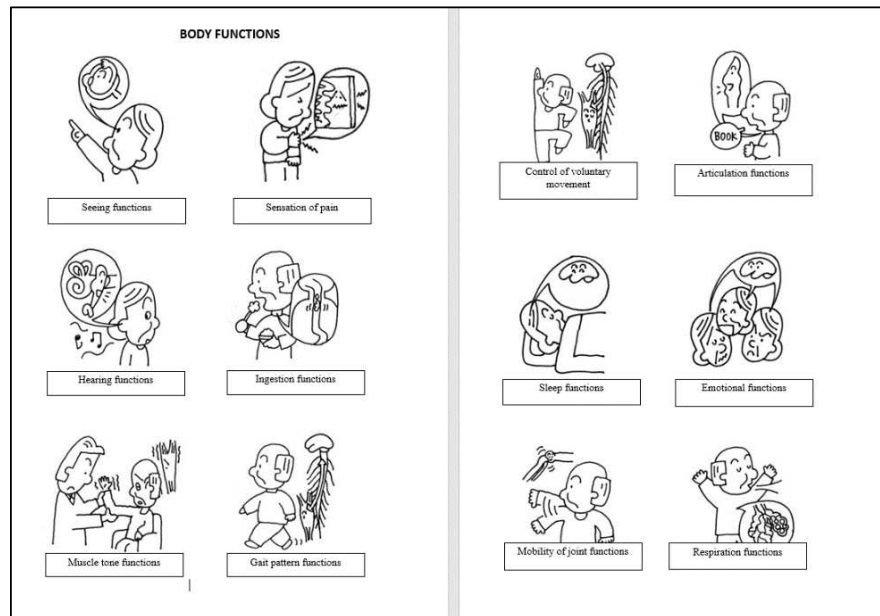

Supplement: bmjopen-2020-038228supp002.pdf [file bmjopen-2020-038228supp002.pdf]
